# Supplementary material for: Improving the SIENA performance using BEaST brain extraction
Source: PLoS One. 2018 Sep 20;13(9):e0196945. doi: 10.1371/journal.pone.0196945 (PMC6147402; doi:10.1371/journal.pone.0196945)
Supplement: S1 File — (XLSX) [file pone.0196945.s001.xlsx]

## Sheet: Sheet1
SiteID	SubjID	Vanilla-SIENA	Popescu-SIENA	Cover-SIENA	CBET-SIENA	BEaST-SIENA	Vanilla-SIENA-abs	Popescu-SIENA-abs	Cover-SIENA-abs	CBET-SIENA-abs	BEaST-SIENA-abs	Vanilla-BET-m00	Vanilla-BET-m00-rescan	Popescu-BET-m00	Popescu-BET-m00-rescan	Cover-BET-m00	Cover-BET-m00-rescan	CBET-BET-m00	CBET-BET-m00-rescan	BEaST-BET-m00	BEaST-BET-m00-rescan	Vanilla-BET-%	Popescu-BET-%	Cover-BET-%	CBET-BET-%	BEaST-%	Vanilla-BET-abs	Popescu-BET-abs	Cover-BET-abs	CBET-BET-abs	BEaST-abs	Vanilla-BET-sens	Popescu-BET-sens	Cover-BET-sens	CBET-BET-sens	BEaST-sens	Vanilla-BET-spec	Popescu-BET-spec	Cover-BET-spec	CBET-BET-spec	BEaST-spec	Vanilla-BET-kappa	Popescu-BET-kappa	Cover-BET-kappa	CBET-BET-kappa	BEaST-kappa	Vanilla-BET-dist	Popescu-BET-dist	Cover-BET-dist
002	0295	-0.216485	-0.115145	-0.181966	-0.157797	-0.0868666	0.216485	0.115145	0.181966	0.157797	0.0868666	1475.31	1468.96	1612.94	1606.92	1470.92	1500.43	1470.92	1472.15	1432.73	1434.51	0.431293	0.373743	-1.98659	-0.0840719	-0.124036	0.431293	0.373743	1.98659	0.0840719	0.124036	0.980109	0.980651	0.982186	0.98301	0.990282	0.997706	0.996069	0.99611	0.997384	0.998442	0.982244	0.982499	0.982657	0.982615	0.989689	0.29196	0.342099	0.325963
002	1280	-0.165719	0.345961	-0.0698918	-0.0461505	-0.04279	0.165719	0.345961	0.0698918	0.0461505	0.04279	1232.33	1230.9	1415.64	1410.46	1229.82	1276.42	1229.82	1229.54	1224.3	1223.47	0.116035	0.366253	-3.71906	0.0228147	0.0680786	0.116035	0.366253	3.71906	0.0228147	0.0680786	0.986185	0.97568	0.98564	0.985423	0.991447	0.998477	0.995115	0.997095	0.998277	0.99906	0.986757	0.977467	0.985848	0.985535	0.991784	0.167477	0.475748	0.189679
024	1307	-0.405888	-0.00523709	-0.0294537	-0.30358	-0.276784	0.405888	0.00523709	0.0294537	0.30358	0.276784	1447.45	1431.52	1606.54	1625.89	1441.15	1473.96	1441.15	1434.53	1373.35	1372.88	1.10672	-1.19726	-2.25131	0.46058	0.0343341	1.10672	1.19726	2.25131	0.46058	0.0343341	0.973183	0.980591	0.977054	0.977804	0.990387	0.99765	0.992806	0.995773	0.997398	0.998702	0.97856	0.974712	0.978263	0.980047	0.990548	0.365362	0.522701	0.42177
027	0074	0.0332565	-0.217083	-0.361486	0.0545011	0.044958	0.0332565	0.217083	0.361486	0.0545011	0.044958	1451.97	1450.35	1653.59	1644.5	1449.2	1513.43	1449.2	1449.82	1467.64	1465.36	0.111998	0.551058	-4.33595	-0.0430749	0.155416	0.111998	0.551058	4.33595	0.0430749	0.155416	0.974763	0.975343	0.980915	0.975295	0.988754	0.996506	0.996246	0.996124	0.996367	0.998579	0.97531	0.978036	0.979467	0.975086	0.989524	0.482463	0.414672	0.380743
027	0118	0.199593	-0.206241	0.0827023	0.05404	0.0419054	0.199593	0.206241	0.0827023	0.05404	0.0419054	1329.13	1324.86	1605.24	1655.93	1327.77	1428.86	1327.77	1323.15	1383.67	1381.42	0.321763	-3.10838	-7.33464	0.348644	0.162985	0.321763	3.10838	7.33464	0.348644	0.162985	0.973828	0.980697	0.981636	0.974685	0.988361	0.997255	0.98993	0.995056	0.997393	0.998748	0.975392	0.965451	0.976425	0.976382	0.989165	0.391064	1.06574	0.458183
027	0120	-0.107619	-0.475614	-0.0448526	-0.0726293	0.00123	0.107619	0.475614	0.0448526	0.0726293	0.00123	1467.12	1458.57	1586.85	1582.22	1468.22	1493.91	1468.22	1454.46	1424.76	1423.39	0.584214	0.292537	-1.73422	0.94149	0.0959835	0.584214	0.292537	1.73422	0.94149	0.0959835	0.977936	0.980481	0.983578	0.976663	0.989112	0.99762	0.995592	0.995384	0.997951	0.998593	0.980794	0.981918	0.982409	0.981263	0.989591	0.316921	0.319775	0.323983
027	0403	-0.177965	0.0729869	0.046061	-0.0851343	-0.063688	0.177965	0.0729869	0.046061	0.0851343	0.063688	1400.78	1408.03	1554.47	1551.72	1404.47	1430.94	1404.47	1410.35	1360.64	1360.86	-0.516153	0.177242	-1.86718	-0.417405	-0.0161216	0.516153	0.177242	1.86718	0.417405	0.0161216	0.987702	0.982294	0.985882	0.988028	0.993066	0.99757	0.995781	0.996445	0.997747	0.999045	0.985153	0.983165	0.985493	0.985966	0.992986	0.224132	0.310872	0.219377
027	0404	-0.293733	-0.100427	-0.162747	-0.319698	-0.252916	0.293733	0.100427	0.162747	0.319698	0.252916	1093.47	1085.53	1264.38	1258.36	1091.01	1149.94	1091.01	1085.5	1098.2	1098.16	0.728649	0.476937	-5.25915	0.506965	0.00374555	0.728649	0.476937	5.25915	0.506965	0.00374555	0.97958	0.974254	0.979823	0.976152	0.99081	0.998614	0.993593	0.994859	0.998026	0.999031	0.983149	0.976577	0.9804	0.978627	0.990829	0.142402	0.44444	0.307421
027	0850	-0.920323	-0.78081	-0.904127	-0.836095	-0.877908	0.920323	0.78081	0.904127	0.836095	0.877908	1359.5	1308.18	1493.28	1472.3	1348.06	1342.33	1348.06	1309.64	1299.7	1294.64	3.84691	1.41489	0.426126	2.89131	0.389703	3.84691	1.41489	0.426126	2.89131	0.389703	0.950053	0.962264	0.972403	0.959174	0.985978	0.998356	0.994317	0.995815	0.998356	0.998702	0.968314	0.969074	0.976268	0.973027	0.987887	0.563206	0.681355	0.374588
027	1081	-0.367505	-0.396252	-0.401703	-0.327141	-0.273388	0.367505	0.396252	0.401703	0.327141	0.273388	1428.29	1381.57	1568.69	1567.57	1431.32	1339.89	1431.32	1404.62	1389.2	1388.13	3.32539	0.0714949	6.59881	1.88308	0.0768611	3.32539	0.0714949	6.59881	1.88308	0.0768611	0.954721	0.976075	0.972937	0.968489	0.988862	0.998209	0.994788	0.995531	0.998164	0.998568	0.970583	0.97641	0.974429	0.977594	0.989228	0.438458	0.459343	0.42888
027	1082	0.245412	0.0291344	0.648116	0.32969	0.298946	0.245412	0.0291344	0.648116	0.32969	0.298946	1210.1	1213.3	1419.9	1426.73	1207.11	1288.57	1207.11	1209.48	1245.85	1249.05	-0.26365	-0.479581	-6.5282	-0.196135	-0.257109	0.26365	0.479581	6.5282	0.196135	0.257109	0.981875	0.976778	0.979751	0.982407	0.991255	0.997551	0.994215	0.99615	0.997701	0.998621	0.980579	0.974434	0.9794	0.981444	0.989979	0.262426	0.507315	0.290526
027	1254	0.319117	0.337299	0.40246	0.388734	0.35639	0.319117	0.337299	0.40246	0.388734	0.35639	1422.27	1427.25	1664.58	1666.98	1425.9	1490.47	1425.9	1427.07	1484.43	1484.93	-0.349326	-0.144231	-4.42824	-0.0819212	-0.0340983	0.349326	0.144231	4.42824	0.0819212	0.0340983	0.973646	0.975472	0.976888	0.97565	0.988642	0.995773	0.994152	0.993844	0.996426	0.998259	0.971937	0.97476	0.972765	0.975241	0.988464	0.535262	0.603965	0.540135
003	0907	-0.0087565	-0.0458672	0.242599	0.159008	0.153897	0.0087565	0.0458672	0.242599	0.159008	0.153897	2737.47	1712.47	1414.34	1423.65	1288.58	1289.98	1288.58	1292.44	1225.54	1227.04	46.0682	-0.65632	-0.10808	-0.298574	-0.122167	46.0682	0.65632	0.10808	0.298574	0.122167	0.616631	0.978155	0.978181	0.968692	0.990872	0.997061	0.992912	0.993167	0.995477	0.99871	0.758666	0.974945	0.973683	0.967246	0.990267	8.6297	0.618369	0.620983
027	1385	0.0550549	-0.247734	0.108312	0.00441755	0.0195494	0.0550549	0.247734	0.108312	0.00441755	0.0195494	1140.96	1144.04	1213.79	1213.26	1141.88	1138.86	1141.88	1143.89	1081.91	1082.22	-0.269649	0.0442377	0.264719	-0.175707	-0.028656	0.269649	0.0442377	0.264719	0.175707	0.028656	0.985563	0.98105	0.983982	0.985468	0.989519	0.998106	0.996115	0.996737	0.998198	0.998878	0.984227	0.981259	0.983593	0.984595	0.989371	0.208947	0.303243	0.213404
029	0824	-0.0229225	-0.0475825	-0.0627628	-0.072639	-0.102172	0.0229225	0.0475825	0.0627628	0.072639	0.102172	1327.74	1327.45	1504.75	1502.62	1330.07	1375.79	1330.07	1327.36	1325.69	1326.03	0.0212114	0.141823	-3.37942	0.203919	-0.026012	0.0212114	0.141823	3.37942	0.203919	0.026012	0.981226	0.978465	0.979423	0.981075	0.990474	0.997567	0.993841	0.995982	0.997782	0.998718	0.981316	0.979149	0.982343	0.982061	0.990332	0.274054	0.381803	0.248202
029	0836	-0.29879	-0.212772	-0.094871	-0.0695926	-0.0973863	0.29879	0.212772	0.094871	0.0695926	0.0973863	1554.66	1539.35	1706.42	1695.51	1553.31	1576.91	1553.31	1534.7	1519.02	1515.74	0.989848	0.640948	-1.5074	1.20558	0.216584	0.989848	0.640948	1.5074	1.20558	0.216584	0.977512	0.978047	0.977781	0.976318	0.989055	0.998022	0.995376	0.994594	0.998172	0.998664	0.98236	0.981191	0.97884	0.982214	0.990139	0.23468	0.354634	0.429261
029	0843	0.296337	0.17316	0.14908	0.112249	0.11824	0.296337	0.17316	0.14908	0.112249	0.11824	1466.1	1463.68	1627.16	1644.31	1464.08	1531.06	1464.08	1460.69	1480.24	1479.24	0.164875	-1.04841	-4.47297	0.231364	0.0676401	0.164875	1.04841	4.47297	0.231364	0.0676401	0.979798	0.982268	0.98321	0.979293	0.989897	0.997277	0.992411	0.995252	0.997305	0.998599	0.98059	0.9771	0.982039	0.980412	0.990215	0.334623	0.542599	0.333481
029	0845	-0.5181	-0.543288	-1.14597	-0.582428	-0.487356	0.5181	0.543288	1.14597	0.582428	0.487356	1571.57	1519.16	2053.92	2047.96	1622.37	1688.05	1622.37	1489.79	1690.37	1687.88	3.39148	0.290601	-3.96817	8.51988	0.147108	3.39148	0.290601	3.96817	8.51988	0.147108	0.928543	0.966044	0.958139	0.893056	0.987845	0.993947	0.990703	0.993667	0.99584	0.998149	0.944273	0.967438	0.965499	0.931084	0.988559	1.08944	0.854288	0.685409
029	0866	0.139716	0.120977	0.149024	0.102952	0.046073	0.139716	0.120977	0.149024	0.102952	0.046073	1317.9	1317.96	1450.68	1431.01	1322.01	1343.91	1322.01	1318.54	1228.53	1228.09	-0.00448147	1.36465	-1.6427	0.263298	0.0356339	0.00448147	1.36465	1.6427	0.263298	0.0356339	0.983732	0.973238	0.983714	0.981753	0.989683	0.997883	0.996911	0.996486	0.997966	0.998805	0.983708	0.979876	0.983605	0.983044	0.989859	0.251953	0.317284	0.294433
029	0999	0.016328	0.0810405	0.346384	-0.037618	0.028753	0.016328	0.0810405	0.346384	0.037618	0.028753	1312.53	1447.9	1488.69	1573.83	1313.7	1386.39	1313.7	1436.39	1295.81	1306.69	-9.80777	-5.56065	-5.38395	-8.92265	-0.836294	9.80777	5.56065	5.38395	8.92265	0.836294	0.987135	0.986773	0.984669	0.986126	0.989303	0.985017	0.982971	0.989008	0.986132	0.997571	0.938731	0.959341	0.967021	0.942136	0.985175	2.00352	1.31472	0.865593
029	1056	0.126606	0.0229455	0.0797402	0.192627	0.130764	0.126606	0.0229455	0.0797402	0.192627	0.130764	1342.97	1343.49	1512.68	1511.2	1336.94	1384.54	1336.94	1337.47	1341.62	1342.43	-0.0385526	0.0979392	-3.49841	-0.0398307	-0.0603565	0.0385526	0.0979392	3.49841	0.0398307	0.0603565	0.976463	0.978647	0.974418	0.976221	0.988997	0.996825	0.99467	0.995605	0.996808	0.998459	0.976261	0.979118	0.977825	0.976015	0.988684	0.40499	0.434997	0.377796
031	0321	0.123788	0.131485	0.269265	0.0904183	0.0810683	0.123788	0.131485	0.269265	0.0904183	0.0810683	1258.98	1260.07	1333.91	1332.26	1263.88	1251.29	1263.88	1257.99	1227.54	1225.4	-0.0864162	0.12445	1.00136	0.467148	0.174653	0.0864162	0.12445	1.00136	0.467148	0.174653	0.981993	0.98124	0.981879	0.97979	0.989158	0.997873	0.996594	0.997	0.99824	0.999002	0.981559	0.98184	0.982608	0.982069	0.990011	0.258029	0.28381	0.238688
031	0554	1.06403	0.900386	0.777922	0.83093	0.834385	1.06403	0.900386	0.777922	0.83093	0.834385	1294.29	1294.62	1398.9	1422.38	1292.57	1320.38	1292.57	1288.62	1272.29	1274.66	-0.0257468	-1.66483	-2.12854	0.305637	-0.186344	0.0257468	1.66483	2.12854	0.305637	0.186344	0.975982	0.984074	0.984678	0.974118	0.989924	0.997187	0.992804	0.993757	0.997359	0.998639	0.97588	0.975894	0.977021	0.975631	0.988999	0.407419	0.555313	0.481951
003	0981	0.377308	0.410373	0.863558	0.501208	0.493564	0.377308	0.410373	0.863558	0.501208	0.493564	1254.83	2075.95	1391.84	1413.19	1256.53	1292.45	1256.53	1270.73	1202.26	1204.52	-49.3049	-1.52217	-2.81848	-1.12429	-0.187595	49.3049	1.52217	2.81848	1.12429	0.187595	0.937493	0.982331	0.982437	0.977915	0.992469	0.90825	0.993427	0.994502	0.99572	0.998852	0.706379	0.974855	0.976064	0.972418	0.991538	17.2639	0.738314	0.622218
031	0618	-1.90781	-1.25805	-0.357818	-0.233764	-0.133499	1.90781	1.25805	0.357818	0.233764	0.133499	3333.86	2255.45	2145.91	2057.88	1885.51	1577.36	1885.51	1493.49	1315.46	1312.43	38.5881	4.18804	17.7976	23.2038	0.231079	38.5881	4.18804	17.7976	23.2038	0.231079	0.670611	0.943129	0.879508	0.774885	0.986925	0.99849	0.995141	0.996228	0.997856	0.999088	0.799884	0.963211	0.9284	0.864828	0.988034	5.84243	0.788534	1.42682
031	1209	0.0128269	-0.0758387	-0.0828336	0.032968	0.0298516	0.0128269	0.0758387	0.0828336	0.032968	0.0298516	1484.55	1497.51	1606.85	1637.27	1494.86	1539.69	1494.86	1497.11	1492.46	1492.27	-0.869129	-1.87535	-2.95434	-0.150379	0.012721	0.869129	1.87535	2.95434	0.150379	0.012721	0.982821	0.981694	0.984371	0.975676	0.991808	0.99649	0.991716	0.997008	0.996473	0.998901	0.97855	0.972489	0.985104	0.974943	0.991871	0.397348	0.471124	0.267365
032	0147	0.313549	-0.0682225	0.585438	0.963448	1.09126	0.313549	0.0682225	0.585438	0.963448	1.09126	1526.35	1509.18	1678.43	1618.11	1524.97	1495.65	1524.97	1511.99	1416.48	1405.36	1.13143	3.65957	1.9412	0.854664	0.788033	1.13143	3.65957	1.9412	0.854664	0.788033	0.973539	0.946443	0.973786	0.97519	0.982869	0.997928	0.995936	0.996435	0.997781	0.998839	0.979054	0.963778	0.978017	0.979362	0.986749	0.34136	0.907918	0.393702
032	0400	-0.195531	-0.50946	-0.322441	-0.161567	-0.182436	0.195531	0.50946	0.322441	0.161567	0.182436	1501.66	1509.31	1697.53	1702.74	1502.06	1552.7	1502.06	1507.62	1540.7	1541.29	-0.50819	-0.306393	-3.31501	-0.369285	-0.0386698	0.50819	0.306393	3.31501	0.369285	0.0386698	0.978361	0.978803	0.979154	0.976586	0.98974	0.996416	0.99406	0.994269	0.996364	0.99853	0.975857	0.977291	0.976474	0.974766	0.989538	0.388949	0.45408	0.416063
032	0479	-0.125871	-0.204171	0.128963	0.0449039	0.100585	0.125871	0.204171	0.128963	0.0449039	0.100585	1483.68	1480.7	1551.52	1551.2	1487.79	1431.77	1487.79	1486.01	1380.85	1378.98	0.201304	0.0209393	3.83703	0.119308	0.13536	0.201304	0.0209393	3.83703	0.119308	0.13536	0.978377	0.979675	0.980428	0.979059	0.988077	0.997408	0.994665	0.995343	0.997382	0.99871	0.979355	0.979772	0.980501	0.979637	0.988736	0.33585	0.377195	0.334212
032	0677	0.167025	0.00901575	-0.229619	0.104443	0.089276	0.167025	0.00901575	0.229619	0.104443	0.089276	1421.89	1428.42	1518.64	1518.61	1423.15	1430.53	1423.15	1421.68	1369.5	1369.78	-0.457869	0.00201406	-0.517293	0.10351	-0.0202522	0.457869	0.00201406	0.517293	0.10351	0.0202522	0.985794	0.983883	0.988006	0.984991	0.993138	0.997634	0.996463	0.997171	0.998239	0.999148	0.983537	0.983893	0.987079	0.985501	0.993038	0.28029	0.286247	0.212836
032	1169	0.699138	0.457435	0.553524	0.58182	0.517658	0.699138	0.457435	0.553524	0.58182	0.517658	1354.12	1370.97	1583.7	1595.25	1349.75	1407.01	1349.75	1383.81	1344.58	1347.38	-1.23625	-0.726645	-4.15376	-2.49214	-0.207571	1.23625	0.726645	4.15376	2.49214	0.207571	0.981102	0.980512	0.978398	0.980401	0.989645	0.996262	0.993224	0.994092	0.994672	0.998526	0.97502	0.976938	0.97565	0.968166	0.988602	0.446595	0.516345	0.456206
033	0516	-0.418388	-0.0290066	-0.22037	-0.117691	-0.110236	0.418388	0.0290066	0.22037	0.117691	0.110236	1405.24	1400.07	1616.16	1618.95	1403.09	1461.83	1403.09	1397.16	1406.24	1406.29	0.368368	-0.172721	-4.10076	0.42357	-0.00337497	0.368368	0.172721	4.10076	0.42357	0.00337497	0.983655	0.98077	0.981134	0.983595	0.991012	0.99823	0.995635	0.996575	0.998302	0.998739	0.985459	0.979922	0.981294	0.985675	0.990991	0.126468	0.377164	0.287234
033	0724	0.0357795	0.160717	0.227147	0.222619	0.18514	0.0357795	0.160717	0.227147	0.222619	0.18514	1504.95	1510.69	1782	1786.21	1498.62	1620.69	1498.62	1509.84	1554.01	1554.37	-0.380585	-0.236108	-7.82712	-0.746302	-0.0232763	0.380585	0.236108	7.82712	0.746302	0.0232763	0.969408	0.977024	0.974053	0.974553	0.989502	0.994801	0.994774	0.995469	0.995047	0.998315	0.967547	0.975869	0.974725	0.970901	0.989374	0.644203	0.56102	0.522454
033	0733	0.508158	0.437549	0.388611	0.355792	0.375634	0.508158	0.437549	0.388611	0.355792	0.375634	1221.3	1214.34	1332.17	1337.36	1218.62	1247.61	1218.62	1211.63	1178.52	1178.01	0.571849	-0.388762	-2.3506	0.575027	0.0427867	0.571849	0.388762	2.3506	0.575027	0.0427867	0.976139	0.978697	0.981733	0.976464	0.988659	0.997838	0.992288	0.993227	0.997885	0.998753	0.978934	0.976798	0.978797	0.979273	0.988882	0.291823	0.495633	0.39808
003	1257	0.52483	0.158327	0.451265	0.0419728	0.0397119	0.52483	0.158327	0.451265	0.0419728	0.0397119	3106.6	3136.88	2067.58	2072.64	1631.19	1755.74	1631.19	1635.31	1601.06	1603.73	-0.970012	-0.244371	-7.35491	-0.252105	-0.16686	0.970012	0.244371	7.35491	0.252105	0.16686	0.969836	0.983481	0.911666	0.983559	0.993594	0.984526	0.994562	0.99735	0.996719	0.998633	0.965276	0.982279	0.948701	0.982319	0.992765	1.34311	0.580184	1.78964
033	0734	0.028978	-0.120171	0.104054	-0.0478035	-0.045765	0.028978	0.120171	0.104054	0.0478035	0.045765	1531.76	1521.6	1679.18	1675.89	1530.67	1552.95	1530.67	1512.26	1501.62	1499.9	0.665623	0.196599	-1.44486	1.21006	0.114552	0.665623	0.196599	1.44486	1.21006	0.114552	0.981183	0.982856	0.980688	0.977065	0.99093	0.998123	0.996248	0.996538	0.998321	0.998807	0.984448	0.983822	0.982634	0.982977	0.991498	0.172481	0.288845	0.285313
033	0739	0.119668	0.0672456	0.0801817	0.264419	0.211151	0.119668	0.0672456	0.0801817	0.264419	0.211151	1429.73	1440.95	1621.01	1619.05	1432	1473.42	1432	1439.82	1418.89	1418.33	-0.781679	0.121222	-2.85107	-0.544123	0.0396266	0.781679	0.121222	2.85107	0.544123	0.0396266	0.983154	0.97815	0.978217	0.982872	0.987791	0.996483	0.995859	0.996323	0.996778	0.998332	0.979305	0.978738	0.978839	0.980191	0.987982	0.37895	0.42364	0.360561
033	0741	0.13633	-0.14423	0.157879	0.219497	0.220392	0.13633	0.14423	0.157879	0.219497	0.220392	1346.56	1353.64	1543.54	1553.49	1352.32	1432.27	1352.32	1354.83	1354.87	1355.26	-0.524024	-0.642476	-5.74183	-0.185213	-0.0294209	0.524024	0.642476	5.74183	0.185213	0.0294209	0.987019	0.982922	0.988113	0.986942	0.991351	0.997575	0.994718	0.994492	0.998008	0.998803	0.984432	0.979764	0.980524	0.986028	0.991206	0.264406	0.454981	0.453954
033	0889	0.703962	0.6381	0.917447	0.656491	0.814035	0.703962	0.6381	0.917447	0.656491	0.814035	1271.92	1277.34	1475.45	1477.57	1263.8	1322.33	1263.8	1282.31	1233.39	1233.55	-0.425309	-0.144005	-4.52635	-1.45388	-0.0134244	0.425309	0.144005	4.52635	1.45388	0.0134244	0.96877	0.969446	0.973448	0.975584	0.985656	0.995574	0.992725	0.993796	0.995164	0.998256	0.966706	0.968737	0.971114	0.968488	0.985588	0.616443	0.730431	0.593143
033	0920	0.687238	0.485776	0.644127	0.42426	0.471697	0.687238	0.485776	0.644127	0.42426	0.471697	1283.99	1287.66	1412.87	1429.79	1278.69	1329.37	1278.69	1285.55	1241.48	1243.88	-0.285198	-1.19001	-3.88604	-0.535191	-0.193763	0.285198	1.19001	3.88604	0.535191	0.193763	0.980778	0.984352	0.987419	0.982094	0.989003	0.997223	0.993302	0.993048	0.997086	0.998434	0.979398	0.978515	0.978128	0.979484	0.98806	0.340819	0.450426	0.48382
033	0923	-0.280093	-0.152119	-0.271128	-0.21865	-0.196266	0.280093	0.152119	0.271128	0.21865	0.196266	1389.86	1386.64	1574.95	1584.62	1392.82	1454.4	1392.82	1388.95	1394.72	1394.36	0.231792	-0.612002	-4.32515	0.278745	0.0260923	0.231792	0.612002	4.32515	0.278745	0.0260923	0.983897	0.983901	0.980621	0.982287	0.991531	0.998097	0.99582	0.997486	0.997935	0.998862	0.985029	0.980882	0.982958	0.983648	0.991653	0.180405	0.381897	0.227709
033	1016	0.0652299	0.0553937	0.114358	0.133888	0.13649	0.0652299	0.0553937	0.114358	0.133888	0.13649	1420.49	1412.09	1466.1	1470.5	1415.25	1377.47	1415.25	1410.07	1298.68	1297.51	0.592991	-0.299677	2.70527	0.366804	0.0896174	0.592991	0.299677	2.70527	0.366804	0.0896174	0.97552	0.98776	0.984791	0.976529	0.992029	0.997376	0.996739	0.997284	0.997213	0.999097	0.978412	0.98628	0.985555	0.97832	0.992474	0.335738	0.198803	0.148212
033	1086	0.030317	-0.181475	-0.0255705	0.072298	0.076105	0.030317	0.181475	0.0255705	0.072298	0.076105	1346.29	1347.65	1554.15	1557.9	1339.55	1401.27	1339.55	1350.24	1343.39	1344.35	-0.101086	-0.240893	-4.50392	-0.794646	-0.0710256	0.101086	0.240893	4.50392	0.794646	0.0710256	0.979267	0.980808	0.983026	0.982609	0.991402	0.99711	0.994829	0.996375	0.996647	0.998766	0.978772	0.979627	0.982916	0.978705	0.99105	0.356341	0.41784	0.28168
033	1098	0.0284955	0.201425	0.295011	0.0549805	0.071388	0.0284955	0.201425	0.295011	0.0549805	0.071388	1214.91	1213.63	1545.26	1539.42	1215.95	1319.58	1215.95	1218.51	1215.55	1208.7	0.105011	0.378701	-8.17422	-0.210811	0.564531	0.105011	0.378701	8.17422	0.210811	0.564531	0.974183	0.979529	0.977525	0.9839	0.985926	0.997067	0.995906	0.996807	0.997841	0.998999	0.974694	0.981384	0.980866	0.982863	0.988709	0.440485	0.330187	0.29358
033	1281	0.137811	0.110433	0.120494	0.23466	0.210424	0.137811	0.110433	0.120494	0.23466	0.210424	1188.25	1191.38	1362.14	1367.34	1187.54	1257.93	1187.54	1191.39	1192.54	1193.93	-0.262914	-0.380997	-5.75743	-0.32382	-0.116408	0.262914	0.380997	5.75743	0.32382	0.116408	0.989004	0.984881	0.983723	0.989289	0.993309	0.998426	0.996395	0.996695	0.998389	0.999089	0.987704	0.983005	0.98232	0.987687	0.992731	0.142619	0.304306	0.261755
005	0223	-0.153033	-0.0890047	-0.0823646	-0.196692	-0.159942	0.153033	0.0890047	0.0823646	0.196692	0.159942	1380.22	1360.57	1411.61	1411.13	1382.54	1287.55	1382.54	1360.21	1248.18	1245.87	1.43442	0.0344496	7.115	1.62851	0.185983	1.43442	0.0344496	7.115	1.62851	0.185983	0.971297	0.976284	0.975983	0.969729	0.987746	0.998027	0.991506	0.993193	0.99807	0.998731	0.978278	0.976464	0.977415	0.977638	0.988663	0.318919	0.472978	0.415489
033	1283	-0.179394	-0.0574218	-0.248995	-0.0909071	-0.0480016	0.179394	0.0574218	0.248995	0.0909071	0.0480016	1526.97	1523.17	1651.85	1647.62	1526.13	1525.61	1526.13	1519.63	1478.57	1480.09	0.249172	0.25649	0.0342272	0.426894	-0.103235	0.249172	0.25649	0.0342272	0.426894	0.103235	0.980826	0.978825	0.961392	0.981405	0.991765	0.997439	0.995799	0.997028	0.997801	0.998629	0.982048	0.98008	0.973332	0.9835	0.991253	0.25067	0.346501	0.589746
033	1285	0.101435	0.155229	0.190805	0.100175	0.12172	0.101435	0.155229	0.190805	0.100175	0.12172	1429.51	1433.37	1569.8	1565.8	1429.14	1471.24	1429.14	1430.89	1418.31	1417.74	-0.269449	0.255565	-2.90296	-0.122209	0.0400894	0.269449	0.255565	2.90296	0.122209	0.0400894	0.986991	0.982257	0.987553	0.986447	0.990959	0.997764	0.996787	0.996473	0.997898	0.99878	0.985661	0.983507	0.984739	0.985844	0.991153	0.205482	0.27535	0.24663
033	1308	0.288973	0.0238847	0.443875	0.599208	0.446841	0.288973	0.0238847	0.443875	0.599208	0.446841	1393.69	1442.2	1643.66	1665.86	1399.44	1513.53	1399.44	1443.1	1442.71	1442.37	-3.42131	-1.3421	-7.83302	-3.07174	0.0233962	3.42131	1.3421	7.83302	3.07174	0.0233962	0.983132	0.981048	0.981811	0.982883	0.988645	0.992859	0.991724	0.991472	0.993292	0.998404	0.966326	0.974475	0.972211	0.9678	0.988771	0.760254	0.640809	0.646507
035	0048	0.225209	-0.264279	0.119118	0.0454575	0.0706859	0.225209	0.264279	0.119118	0.0454575	0.0706859	1366.07	1361.95	1675.07	1679.67	1362.18	1513.12	1362.18	1362.52	1392.62	1393.8	0.301867	-0.274201	-10.4995	-0.0250487	-0.0850554	0.301867	0.274201	10.4995	0.0250487	0.0850554	0.981805	0.977841	0.978595	0.981675	0.991648	0.997861	0.993586	0.994328	0.997391	0.998674	0.983287	0.976501	0.976789	0.981552	0.991227	0.360368	0.642369	0.599216
035	0156	0.39218	0.496607	0.208262	0.469833	0.517357	0.39218	0.496607	0.208262	0.469833	0.517357	1447.34	1456.23	1731.54	1717.92	1448.28	1583.43	1448.28	1454.63	1449.34	1449.6	-0.612435	0.78947	-8.91592	-0.437148	-0.0182394	0.612435	0.78947	8.91592	0.437148	0.0182394	0.975329	0.970891	0.976438	0.973227	0.988287	0.99536	0.994056	0.993788	0.995304	0.998198	0.972344	0.974712	0.975772	0.971096	0.988171	0.717328	0.77535	0.641755
035	0341	-0.223497	0.239095	-0.00177595	-0.0472914	-0.104825	0.223497	0.239095	0.00177595	0.0472914	0.104825	1534.23	1525.09	1793.93	1803.21	1532.9	1630.31	1532.9	1525.64	1495.23	1495.12	0.597559	-0.516244	-6.15838	0.474735	0.00764961	0.597559	0.516244	6.15838	0.474735	0.00764961	0.980681	0.978059	0.978289	0.978325	0.992838	0.997848	0.992171	0.99476	0.997274	0.998892	0.983611	0.975535	0.978899	0.980648	0.992876	0.334717	0.661707	0.503832
035	0555	-0.0685309	-0.287843	-0.121943	-0.1517	-0.203299	0.0685309	0.287843	0.121943	0.1517	0.203299	1663	1634.38	1887.17	1881.93	1661.26	1732.17	1661.26	1627.78	1625.04	1615.5	1.73638	0.278084	-4.179	2.0362	0.588675	1.73638	0.278084	4.179	2.0362	0.588675	0.962735	0.974588	0.968172	0.959606	0.984321	0.996448	0.992813	0.994139	0.996419	0.998312	0.971084	0.975958	0.973784	0.969364	0.987222	0.696992	0.697164	0.609939
036	0576	2.70214	2.48527	2.07732	2.22016	2.27057	2.70214	2.48527	2.07732	2.22016	2.27057	1541.52	1584.29	1715.43	1727.86	1540.59	1607.59	1540.59	1592.03	1486.26	1492.83	-2.73685	-0.722275	-4.25679	-3.28455	-0.440571	2.73685	0.722275	4.25679	3.28455	0.440571	0.977809	0.979929	0.980546	0.97719	0.990413	0.991905	0.992758	0.993167	0.990896	0.997819	0.964408	0.976372	0.976225	0.961119	0.988208	1.0323	0.698422	0.673854
036	0577	0.937843	0.832434	0.148845	0.523466	0.613	0.937843	0.832434	0.148845	0.523466	0.613	1230.3	1247.25	1425.06	1447.71	1229.51	1324.87	1229.51	1244.07	1235.4	1235.46	-1.36844	-1.57714	-7.46635	-1.17719	-0.00485662	1.36844	1.57714	7.46635	1.17719	0.00485662	0.980077	0.978667	0.979876	0.979998	0.988318	0.99578	0.992018	0.993337	0.996015	0.998522	0.973363	0.970945	0.97287	0.974222	0.988284	0.655582	0.836783	0.716176
036	0672	0.273421	0.103473	0.123907	0.105885	0.106	0.273421	0.103473	0.123907	0.105885	0.106	1345.41	1342.14	1509.75	1503.39	1341.93	1386.75	1341.93	1335.57	1265.01	1265.64	0.242926	0.422026	-3.28505	0.47521	-0.0493449	0.242926	0.422026	3.28505	0.47521	0.0493449	0.977184	0.972818	0.975637	0.977337	0.988024	0.997187	0.992949	0.994935	0.997536	0.998399	0.978409	0.974908	0.978648	0.979699	0.987815	0.537679	0.652566	0.501014
005	0553	0.06956	-0.0417641	-0.159168	-0.0387115	-0.007721	0.06956	0.0417641	0.159168	0.0387115	0.007721	1457.76	1449.21	1627.04	1631.93	1449.81	1481.25	1449.81	1443.35	1402.15	1402.33	0.588121	-0.29989	-2.14502	0.446348	-0.0133847	0.588121	0.29989	2.14502	0.446348	0.0133847	0.979046	0.980016	0.981892	0.978443	0.988364	0.997805	0.994453	0.995185	0.997527	0.998363	0.981928	0.978552	0.979739	0.98063	0.988301	0.266323	0.429577	0.374331
036	0759	-0.239888	0.0204945	-0.431858	-0.16445	-0.163997	0.239888	0.0204945	0.431858	0.16445	0.163997	1259.64	1252.3	1505.44	1499.73	1263.13	1329.31	1263.13	1255.02	1228.05	1225.48	0.584756	0.37997	-5.10499	0.644519	0.20924	0.584756	0.37997	5.10499	0.644519	0.20924	0.972668	0.968466	0.962586	0.972512	0.987111	0.997233	0.993826	0.995342	0.99728	0.998648	0.975499	0.970289	0.969106	0.975632	0.988131	0.563122	0.747571	0.714032
036	0760	-0.678546	-0.521501	-0.283609	-0.504696	-0.521347	0.678546	0.521501	0.283609	0.504696	0.521347	1310.16	1291.58	1484.87	1468.72	1308.66	1340.29	1308.66	1297	1232.71	1231.63	1.42866	1.09367	-2.38801	0.894735	0.08765	1.42866	1.09367	2.38801	0.894735	0.08765	0.971326	0.968544	0.969903	0.97601	0.988049	0.998055	0.995678	0.996489	0.997978	0.998613	0.978272	0.973852	0.975499	0.980386	0.988491	0.438765	0.564797	0.523957
036	0813	-0.052777	0.820661	0.045547	0.0962899	0.142664	0.052777	0.820661	0.045547	0.0962899	0.142664	1420.65	1419.89	1607.25	1610.19	1419.63	1475.03	1419.63	1417.29	1376.97	1377.22	0.0534315	-0.182745	-3.82772	0.164515	-0.0183196	0.0534315	0.182745	3.82772	0.164515	0.0183196	0.983252	0.976494	0.979774	0.983247	0.99072	0.997823	0.994565	0.996294	0.997973	0.998773	0.983514	0.975601	0.980312	0.984056	0.990629	0.329492	0.565538	0.430122
036	1023	-0.222488	0.173041	0.111184	0.0477004	0.0698627	0.222488	0.173041	0.111184	0.0477004	0.0698627	1237.44	1241.66	1430.93	1423.42	1235.14	1294.7	1235.14	1240.99	1172.09	1173.67	-0.340649	0.526696	-4.70822	-0.472661	-0.134445	0.340649	0.526696	4.70822	0.472661	0.134445	0.985013	0.969798	0.976347	0.985091	0.989867	0.997681	0.99404	0.994291	0.99753	0.998639	0.983334	0.972348	0.974651	0.982762	0.9892	0.417805	0.712584	0.657243
037	0303	-0.225758	-0.905625	-0.460904	-0.235417	-0.14915	0.225758	0.905625	0.460904	0.235417	0.14915	1323.46	1318.36	1445.55	1435.76	1321.02	1321.82	1321.02	1304.81	1322.34	1321.06	0.385574	0.679306	-0.0611614	1.23406	0.0963159	0.385574	0.679306	0.0611614	1.23406	0.0963159	0.976571	0.970538	0.963681	0.972162	0.990215	0.99767	0.995386	0.996581	0.99815	0.998951	0.978455	0.973836	0.972438	0.978162	0.990691	0.332826	0.416868	0.430472
037	0327	0.157602	-0.0801814	-0.121916	-0.0878382	-0.0732739	0.157602	0.0801814	0.121916	0.0878382	0.0732739	1466.98	1485.76	1636.37	1623.13	1475.57	1542.41	1475.57	1465.06	1495.99	1494.84	-1.2716	0.812427	-4.42978	0.714236	0.0770167	1.2716	0.812427	4.42978	0.714236	0.0770167	0.977154	0.970893	0.981382	0.969881	0.989022	0.995237	0.996262	0.991952	0.996904	0.998603	0.970948	0.974839	0.966092	0.973341	0.989397	0.564005	0.426881	0.830906
037	0454	-1.04904	-1.18892	-1.12975	-0.804214	-0.662227	1.04904	1.18892	1.12975	0.804214	0.662227	1329.16	1314.83	1389.83	1392.72	1331.24	1301.62	1331.24	1313.95	1253.46	1257	1.08429	-0.207863	2.25053	1.30716	-0.281647	1.08429	0.207863	2.25053	1.30716	0.281647	0.970934	0.978048	0.981432	0.969611	0.990237	0.997812	0.995864	0.996465	0.997914	0.99859	0.976193	0.977024	0.979612	0.975946	0.98884	0.41713	0.490955	0.36358
037	0467	-0.163559	-0.0054962	-0.0267414	-0.0752938	0.0636455	0.163559	0.0054962	0.0267414	0.0752938	0.0636455	1359.44	1334.1	1499.57	1498.05	1357.27	1383.01	1357.27	1328.98	1316.32	1314.76	1.8813	0.10119	-1.8784	2.10651	0.118333	1.8813	0.10119	1.8784	2.10651	0.118333	0.967017	0.979913	0.974926	0.96572	0.989799	0.998239	0.996324	0.996826	0.998353	0.998931	0.976107	0.9804	0.97839	0.975885	0.990377	0.368048	0.338614	0.366214
037	0627	0.75941	0.419011	0.639087	0.605795	0.53745	0.75941	0.419011	0.639087	0.605795	0.53745	1243.74	1240.18	1327	1328.38	1244.93	1256.82	1244.93	1242.23	1213.02	1210.76	0.286864	-0.103746	-0.950652	0.216945	0.185805	0.286864	0.103746	0.950652	0.216945	0.185805	0.97973	0.979176	0.979952	0.979576	0.989298	0.99807	0.995716	0.996596	0.997974	0.999046	0.981148	0.978677	0.980721	0.980654	0.990223	0.253079	0.405082	0.280195
041	0125	0.0054505	-0.09547	0.0320891	0.0392856	0.0593494	0.0054505	0.09547	0.0320891	0.0392856	0.0593494	1625.27	1630.07	1901.85	1896.05	1627.43	1749.96	1627.43	1628.23	1626.15	1627.46	-0.29513	0.305696	-7.25565	-0.0492986	-0.0802187	0.29513	0.305696	7.25565	0.0492986	0.0802187	0.981322	0.971914	0.978293	0.979538	0.990258	0.996273	0.993204	0.994	0.996384	0.998182	0.979874	0.9734	0.976865	0.979297	0.989861	0.497135	0.729891	0.648645
005	0602	-0.178685	-0.267023	-0.134465	-0.115573	-0.113386	0.178685	0.267023	0.134465	0.115573	0.113386	1391.81	1394.57	1533.07	1545.62	1391.55	1430.08	1391.55	1402.58	1348.73	1351.6	-0.198342	-0.815322	-2.73108	-0.78913	-0.212296	0.198342	0.815322	2.73108	0.78913	0.212296	0.981622	0.98318	0.985491	0.98183	0.990177	0.997185	0.994509	0.995575	0.996394	0.998405	0.980634	0.979157	0.981742	0.977941	0.989111	0.321454	0.423876	0.344005
041	0262	2.05002	0.69876	1.10827		0.899998	2.05002	0.69876	1.10827		0.899998	1369.53	2956.48	1576.36	1553.81	1374.17	1374.26	1374.17	2971.23	1305.9	1319.86	-73.3679	1.44073	-0.00697123	-73.5058	-1.06312	73.3679	1.44073	0.00697123	73.5058	1.06312	0.941337	0.960944	0.94885	0.942466	0.991087	0.828885	0.994147	0.996266	0.827936	0.997377	0.597294	0.96787	0.964885	0.597413	0.985823	18.571	0.757704	0.732564
041	0898	0.071054	-0.351841	0.0936972	-0.176077	-0.155451	0.071054	0.351841	0.0936972	0.176077	0.155451	1387.63	1379.6	1710.43	1707.86	1386.7	1547.05	1386.7	1378.06	1391.41	1390.15	0.58068	0.150075	-10.931	0.625552	0.0907313	0.58068	0.150075	10.931	0.625552	0.0907313	0.976141	0.975388	0.973605	0.976069	0.988829	0.997399	0.99473	0.994973	0.997455	0.998515	0.978947	0.976097	0.974327	0.979095	0.989251	0.486361	0.690271	0.671862
041	1002	-0.529459	-0.735089	-0.464585	-0.745026	-0.667159	0.529459	0.735089	0.464585	0.745026	0.667159	1455.81	1446.86	1785.63	1773.68	1451.62	1616.96	1451.62	1445.69	1449.34	1451.39	0.616114	0.671865	-10.7766	0.409129	-0.141559	0.616114	0.671865	10.7766	0.409129	0.141559	0.969977	0.971609	0.966953	0.971056	0.988481	0.996383	0.994017	0.994831	0.996248	0.998055	0.972974	0.974885	0.972863	0.973058	0.987801	0.640235	0.688159	0.671984
041	1368	-0.0600938	-0.0200342	0.0834606	0.140808	0.167086	0.0600938	0.0200342	0.0834606	0.140808	0.167086	1188.26	1195.9	1509.25	1520.18	1184.36	1346.86	1184.36	1194.73	1208.26	1206.71	-0.641422	-0.721919	-12.8397	-0.871501	0.128418	0.641422	0.721919	12.8397	0.871501	0.128418	0.981432	0.978126	0.976605	0.983431	0.987211	0.996988	0.991699	0.993264	0.99696	0.998586	0.978275	0.974587	0.974634	0.979136	0.987835	0.498512	0.735044	0.626548
051	1123	0.119514	0.0451752	-0.047038	0.115436	0.141985	0.119514	0.0451752	0.047038	0.115436	0.141985	1183.71	1182.46	1473.31	1472.78	1184.48	1305.19	1184.48	1184.09	1174.52	1175.74	0.104916	0.0358951	-9.69667	0.0324562	-0.103712	0.104916	0.0358951	9.69667	0.0324562	0.103712	0.975901	0.976536	0.976368	0.977156	0.988297	0.997232	0.993134	0.992436	0.997298	0.998484	0.976392	0.976721	0.97331	0.97731	0.987775	0.460509	0.630536	0.650065
051	1296	0.257404	0.147912	0.894046	0.130666	0.183657	0.257404	0.147912	0.894046	0.130666	0.183657	1569.35	1570.74	1746.42	1769.7	1563.95	1605.93	1563.95	1577.12	1469.06	1474.46	-0.0886123	-1.32376	-2.64875	-0.83845	-0.366525	0.0886123	1.32376	2.64875	0.83845	0.366525	0.975495	0.981901	0.97727	0.979672	0.989547	0.995803	0.991348	0.993172	0.995267	0.99784	0.97507	0.975401	0.974828	0.975569	0.987744	0.644181	0.821096	0.732076
052	0951	-0.778981	-0.416095	-0.678542	-0.741058	-0.674686	0.778981	0.416095	0.678542	0.741058	0.674686	1529.12	1498.58	1686.13	1666.38	1539.94	1531.22	1539.94	1494.56	1483.78	1478.32	2.01748	1.17829	0.568034	2.9908	0.368878	2.01748	1.17829	0.568034	2.9908	0.368878	0.966771	0.974141	0.973323	0.958368	0.989514	0.997962	0.995974	0.996165	0.998114	0.998989	0.976524	0.97988	0.979036	0.9727	0.991339	0.329312	0.356679	0.336175
052	1250	0.0812481	0.152013	0.196824	-0.0521156	-0.004796	0.0812481	0.152013	0.196824	0.0521156	0.004796	1038.56	1038.33	1122.81	1122.68	1038.49	1070.94	1038.49	1037.15	1025.6	1024.64	0.0215316	0.0109908	-3.07643	0.129674	0.094139	0.0215316	0.0109908	3.07643	0.129674	0.094139	0.985927	0.986094	0.986625	0.984612	0.989947	0.998621	0.995715	0.995884	0.998597	0.999105	0.986031	0.986151	0.986268	0.985249	0.990412	0.11956	0.159243	0.137089
052	1251	-0.182662	0.0837574	-0.061224	0.0141405	0.112024	0.182662	0.0837574	0.061224	0.0141405	0.112024	1332.5	1331.71	1453.9	1456.74	1333.97	1348.16	1333.97	1335.93	1235.53	1235.47	0.0596183	-0.19473	-1.05793	-0.146872	0.00469507	0.0596183	0.19473	1.05793	0.146872	0.00469507	0.984343	0.987149	0.98517	0.986288	0.992707	0.998021	0.995839	0.996231	0.998003	0.999126	0.984637	0.986188	0.985209	0.985564	0.992731	0.228821	0.230441	0.205485
053	1044	0.779238	0.815159	0.78454	0.811933	0.770637	0.779238	0.815159	0.78454	0.811933	0.770637	1433.66	1445.34	1614.38	1622.31	1432.92	1492.01	1432.92	1444.76	1423.07	1423.88	-0.811	-0.490526	-4.04048	-0.822951	-0.056898	0.811	0.490526	4.04048	0.822951	0.056898	0.984141	0.97781	0.981892	0.984185	0.989901	0.996573	0.994037	0.995112	0.996564	0.998489	0.980151	0.975409	0.978696	0.980136	0.989617	0.339044	0.540913	0.418608
005	0610	-0.063526	0.0556244	-0.118456	0.0589202	0.0582597	0.063526	0.0556244	0.118456	0.0589202	0.0582597	1335.22	1343.11	1609.2	1637.32	1339.74	1408.18	1339.74	1333.57	1385.9	1381.38	-0.588631	-1.73245	-4.98149	0.461358	0.326847	0.588631	1.73245	4.98149	0.461358	0.326847	0.973243	0.975727	0.972797	0.965918	0.986991	0.995695	0.989559	0.994786	0.996099	0.998659	0.970366	0.967269	0.974116	0.968133	0.988596	0.530306	0.866364	0.438092
057	0474	0.629216	-0.010354	-0.0130337	0.0729446	0.0704506	0.629216	0.010354	0.0130337	0.0729446	0.0704506	1361.65	1383.98	1659.05	1666.69	1363.73	1520.18	1363.73	1385.85	1352.08	1355.42	-1.62667	-0.459483	-10.8493	-1.60892	-0.246814	1.62667	0.459483	10.8493	1.60892	0.246814	0.98348	0.979875	0.982415	0.982179	0.990273	0.995376	0.994846	0.994149	0.99521	0.9983	0.975476	0.977618	0.975526	0.974272	0.989049	0.64978	0.633685	0.715197
057	0643	0.0274066	0.0932969	0.124131	-0.0400208	-0.00193479	0.0274066	0.0932969	0.124131	0.0400208	0.00193479	1403.17	1406.58	1626.15	1635.82	1407.6	1510.82	1407.6	1403.09	1371.18	1370.82	-0.242371	-0.592968	-7.07367	0.321006	0.0262582	0.242371	0.592968	7.07367	0.321006	0.0262582	0.985282	0.98001	0.979695	0.982024	0.989352	0.997504	0.993252	0.994246	0.997839	0.998524	0.984071	0.977102	0.977707	0.983578	0.989461	0.40596	0.653203	0.597774
057	0779	-0.104166	-0.1539	-0.0282344	-0.153565	-0.0967023	0.104166	0.1539	0.0282344	0.153565	0.0967023	1565.9	1558.84	1818.76	1810.21	1568.13	1662.37	1568.13	1562.09	1520.17	1518.31	0.451957	0.470898	-5.83406	0.385755	0.122429	0.451957	0.470898	5.83406	0.385755	0.122429	0.974049	0.973895	0.975479	0.975835	0.988045	0.996457	0.99308	0.99266	0.996636	0.998283	0.976232	0.976185	0.974966	0.977696	0.988627	0.557733	0.640283	0.6882
057	0818	0.407832	0.372665	0.368768	0.414351	0.427719	0.407832	0.372665	0.368768	0.414351	0.427719	1284.63	1289.8	1493.41	1516.11	1286.06	1383.39	1286.06	1292.8	1250.49	1250.99	-0.401593	-1.50896	-7.29222	-0.52276	-0.0400262	0.401593	1.50896	7.29222	0.52276	0.0400262	0.981558	0.979853	0.981388	0.981869	0.988883	0.997045	0.992163	0.994006	0.996922	0.998531	0.979579	0.972435	0.975776	0.979292	0.988682	0.486872	0.815015	0.645082
057	0934	0.0267968	-0.0290791	0.219802	0.204062	0.154926	0.0267968	0.0290791	0.219802	0.204062	0.154926	1288.56	1288.31	1460.21	1468	1287.53	1357.51	1287.53	1291.93	1231.14	1232.48	0.0195004	-0.532493	-5.29107	-0.340769	-0.108986	0.0195004	0.532493	5.29107	0.340769	0.108986	0.981107	0.979481	0.979601	0.982475	0.989126	0.997535	0.993717	0.994536	0.997242	0.998503	0.981208	0.976872	0.977482	0.980806	0.988594	0.443074	0.639843	0.599371
057	1371	0.649487	0.355281	0.54069	0.657673	0.684753	0.649487	0.355281	0.54069	0.657673	0.684753	1407.52	1407.77	1651.25	1662.14	1408.22	1511.56	1408.22	1407.84	1387.91	1389.56	-0.017183	-0.656994	-7.07881	0.0270325	-0.118678	0.017183	0.656994	7.07881	0.0270325	0.118678	0.973738	0.979495	0.975334	0.971168	0.988648	0.996152	0.993374	0.993623	0.995837	0.998205	0.973676	0.976295	0.973128	0.971313	0.988078	0.601867	0.6887	0.695782
057	1373	-0.0844285	0.420106	0.052238	-0.0112755	-0.097769	0.0844285	0.420106	0.052238	0.0112755	0.097769	1234.76	1253.47	1495.55	1540.46	1240.17	1380.49	1240.17	1253.68	1211.31	1218.06	-1.50408	-2.95849	-10.7084	-1.08371	-0.5557	1.50408	2.95849	10.7084	1.08371	0.5557	0.970334	0.978387	0.979954	0.967534	0.98924	0.994367	0.989676	0.990899	0.994523	0.997996	0.963038	0.963916	0.964561	0.962291	0.986513	0.934602	1.23041	1.18697
057	1379	-0.371259	-0.252761	-0.426612	-0.203656	-0.217558	0.371259	0.252761	0.426612	0.203656	0.217558	1560.4	1533.46	1884.85	1870.79	1565.77	1733.71	1565.77	1524.96	1598.65	1601.2	1.74103	0.748573	-10.1798	2.64076	-0.159734	1.74103	0.748573	10.1798	2.64076	0.159734	0.956968	0.969902	0.971149	0.953789	0.988439	0.995761	0.993497	0.995531	0.996672	0.997771	0.965282	0.973516	0.976902	0.966367	0.987633	0.782359	0.736548	0.61242
062	0535	-0.260012	-0.00017305	0.37676	-0.32458	-0.294743	0.260012	0.00017305	0.37676	0.32458	0.294743	1501.22	1493.78	1893.53	1866.98	1513.32	1660.19	1513.32	1491	1503.93	1501.92	0.49684	1.41205	-9.2556	1.48617	0.134016	0.49684	1.41205	9.2556	1.48617	0.134016	0.969238	0.967453	0.972118	0.960498	0.988048	0.99631	0.995225	0.994173	0.996429	0.998479	0.971646	0.974285	0.972764	0.967637	0.98871	0.573682	0.718923	0.657943
062	0578	0.0601533	-0.05816	0.042461	0.045058	0.0166455	0.0601533	0.05816	0.042461	0.045058	0.0166455	1310.21	1296.78	1480.36	1471.5	1305.02	1356.15	1305.02	1297.29	1217.17	1213.9	1.0305	0.600257	-3.84264	0.59428	0.268709	1.0305	0.600257	3.84264	0.59428	0.268709	0.977974	0.979535	0.979768	0.980064	0.99001	0.998418	0.996278	0.996171	0.998125	0.999096	0.983013	0.982474	0.98158	0.982976	0.99134	0.356786	0.408027	0.428263
005	0814	-0.514167	-0.357785	-0.603993	-0.717971	-0.70566	0.514167	0.357785	0.603993	0.717971	0.70566	1388.49	1313.89	1457.97	1427.06	1383.68	1343.02	1383.68	1306.95	1260.29	1263.19	5.52092	2.14304	2.98265	5.70314	-0.229816	5.52092	2.14304	2.98265	5.70314	0.229816	0.925592	0.960997	0.977049	0.926789	0.988763	0.997148	0.995781	0.993357	0.99756	0.998324	0.951125	0.971278	0.972954	0.953202	0.987603	0.928938	0.491041	0.489632
062	0690	-0.0981186	0.209812	-0.0947158	0.0389125	0.030782	0.0981186	0.209812	0.0947158	0.0389125	0.030782	1456.15	1447.84	1731.04	1731.72	1457.5	1571.95	1457.5	1453.45	1436.18	1436.01	0.572522	-0.0393651	-7.5561	0.278169	0.0119003	0.572522	0.0393651	7.5561	0.278169	0.0119003	0.976826	0.978078	0.979838	0.977843	0.991561	0.997588	0.994369	0.994337	0.997321	0.998869	0.979623	0.977886	0.977256	0.979203	0.99162	0.365231	0.558504	0.554046
062	0730	0.108418	0.138297	0.166581	0.244987	0.241898	0.108418	0.138297	0.166581	0.244987	0.241898	1320.77	1330.35	1546	1546.59	1322.05	1430.53	1322.05	1323.85	1302.56	1303.05	-0.722806	-0.0379535	-7.8823	-0.135776	-0.0374193	0.722806	0.0379535	7.8823	0.135776	0.0374193	0.985064	0.982259	0.982825	0.982409	0.990672	0.99699	0.995666	0.99473	0.997427	0.998705	0.981504	0.982073	0.979262	0.981742	0.990487	0.493787	0.521904	0.588653
062	0768	-0.0838543	-0.0377002	0.0141561	0.132125	0.0924081	0.0838543	0.0377002	0.0141561	0.132125	0.0924081	1626.77	1628.21	1860.68	1880.52	1622.77	1734.6	1622.77	1633.93	1570.55	1569.98	-0.0887563	-1.06076	-6.66158	-0.685435	0.036278	0.0887563	1.06076	6.66158	0.685435	0.036278	0.979584	0.983192	0.982606	0.982887	0.991005	0.996659	0.992795	0.993497	0.996248	0.9987	0.97915	0.977977	0.977711	0.979518	0.991184	0.467303	0.594952	0.578851
062	0793	0.0876887	0.0819745	0.0140088	0.266179	0.268397	0.0876887	0.0819745	0.0140088	0.266179	0.268397	1425.65	1424.06	1790.87	1802.42	1419.8	1588.68	1419.8	1420.7	1436.25	1436.51	0.111517	-0.643085	-11.2269	-0.06303	-0.0182717	0.111517	0.643085	11.2269	0.06303	0.0182717	0.979032	0.976893	0.973262	0.978404	0.988346	0.997322	0.992893	0.994067	0.997016	0.99839	0.979574	0.973745	0.972334	0.97809	0.988254	0.398078	0.663664	0.652366
062	1099	-0.281034	0.0991671	-0.158293	-0.307395	-0.300304	0.281034	0.0991671	0.158293	0.307395	0.300304	1214.65	1222.05	1360.95	1367.89	1213.39	1270.53	1213.39	1220.64	1155.48	1153.64	-0.607737	-0.508595	-4.60075	-0.595462	0.159639	0.607737	0.508595	4.60075	0.595462	0.159639	0.98973	0.981918	0.985337	0.988973	0.990788	0.997981	0.993581	0.994856	0.997905	0.999111	0.986723	0.979421	0.982512	0.986029	0.991579	0.364626	0.555189	0.460575
067	0019	-0.534042	-0.347567	-0.178642	-0.195569	-0.130781	0.534042	0.347567	0.178642	0.195569	0.130781	1323.88	1322.01	1470.21	1462.28	1327.24	1340.53	1327.24	1318.04	1245.58	1244.95	0.141871	0.540921	-0.99628	0.696052	0.0507423	0.141871	0.540921	0.99628	0.696052	0.0507423	0.976001	0.970771	0.970457	0.973485	0.98694	0.996931	0.994724	0.995704	0.997332	0.998409	0.9767	0.973401	0.974382	0.97688	0.987198	0.528172	0.63925	0.527775
067	0056	-0.174189	-0.125004	-0.143528	-0.196952	-0.196199	0.174189	0.125004	0.143528	0.196952	0.196199	1215.37	1213.61	1331.78	1342.95	1215.68	1263.17	1215.68	1213.33	1167.99	1169.08	0.144505	-0.835737	-3.83199	0.193752	-0.0933864	0.144505	0.835737	3.83199	0.193752	0.0933864	0.98687	0.985669	0.988404	0.98654	0.992609	0.998557	0.99306	0.994316	0.998577	0.999017	0.987583	0.98155	0.984196	0.987496	0.992146	0.305676	0.536367	0.442336
067	0059	-0.287345	-0.244145	-0.249571	-0.227077	-0.224482	0.287345	0.244145	0.249571	0.227077	0.224482	1162.58	1153.75	1297.56	1295.73	1160.89	1207.92	1160.89	1152.63	1113.63	1113.98	0.76252	0.141134	-3.97081	0.714495	-0.0314799	0.76252	0.141134	3.97081	0.714495	0.0314799	0.977113	0.97562	0.979905	0.977135	0.988482	0.998207	0.992154	0.993166	0.998156	0.998678	0.98085	0.976316	0.978953	0.980638	0.988338	0.401835	0.593677	0.519279
067	0076	0.0708691	0.183671	0.219066	0.204924	0.169216	0.0708691	0.183671	0.219066	0.204924	0.169216	1351.04	1366.92	1492.6	1527.05	1343.11	1385.27	1343.11	1360.04	1312.91	1313.35	-1.16875	-2.28144	-3.09044	-1.25243	-0.0336981	1.16875	2.28144	3.09044	1.25243	0.0336981	0.979076	0.980535	0.97903	0.977711	0.987885	0.995455	0.990216	0.993467	0.995179	0.998326	0.973366	0.969358	0.973904	0.971597	0.987732	0.644096	0.932182	0.676862
067	0110	-0.143449	-0.151329	-0.148574	-0.227966	-0.120177	0.143449	0.151329	0.148574	0.227966	0.120177	1514.82	1589.68	1657.03	1661.34	1494.37	1517.91	1494.37	1479.79	1470.21	1471.16	-4.82274	-0.259803	-1.56275	0.98095	-0.0645108	4.82274	0.259803	1.56275	0.98095	0.0645108	0.983602	0.977385	0.972963	0.965787	0.988903	0.989553	0.993567	0.994456	0.996175	0.998198	0.959881	0.976107	0.974363	0.970508	0.988579	1.13326	0.625446	0.575275
005	1341	-1.1091	-1.19933	-0.668121	-0.821937	-0.701232	1.1091	1.19933	0.668121	0.821937	0.701232	1283.38	1210.7	1336	1295.29	1284.33	1189.3	1284.33	1213.06	1150.41	1140.49	5.82851	3.09421	7.68368	5.70735	0.865809	5.82851	3.09421	7.68368	5.70735	0.865809	0.932876	0.953707	0.967633	0.933247	0.982076	0.998678	0.994437	0.994557	0.99858	0.998963	0.96006	0.968461	0.974773	0.959877	0.986327	0.755084	0.638666	0.424627
067	0177	-0.013617	-0.534586	-0.264408	-0.496026	-0.466375	0.013617	0.534586	0.264408	0.496026	0.466375	1298.34	1284.19	1373.59	1357.72	1296.61	1290.65	1296.61	1282.79	1199.61	1198.22	1.09529	1.16236	0.460867	1.07191	0.116042	1.09529	1.16236	0.460867	1.07191	0.116042	0.972513	0.969599	0.982389	0.971107	0.987469	0.997789	0.993811	0.988485	0.997575	0.998613	0.977827	0.975221	0.971908	0.976299	0.988029	0.437461	0.528335	0.693628
067	0257	-0.38252	0.161726	-0.538344	-0.0326644	-0.0129655	0.38252	0.161726	0.538344	0.0326644	0.0129655	1179.94	1179.12	1268.99	1287.05	1179.54	1181.61	1179.54	1190.85	1116.06	1117.16	0.0688304	-1.41297	-0.175656	-0.954432	-0.0984004	0.0688304	1.41297	0.175656	0.954432	0.0984004	0.977326	0.98068	0.97843	0.981395	0.990143	0.997382	0.992875	0.995602	0.996642	0.998792	0.977696	0.973785	0.977951	0.976744	0.989696	0.458328	0.688157	0.498247
068	0109	0.088971	-0.0127207	-0.140645	-0.113878	-0.108495	0.088971	0.0127207	0.140645	0.113878	0.108495	1193.33	1188.64	1288.76	1284.98	1193.44	1212.89	1193.44	1191.88	1164.15	1164.36	0.39425	0.293572	-1.61654	0.130967	-0.0178461	0.39425	0.293572	1.61654	0.130967	0.0178461	0.979358	0.97847	0.979742	0.980165	0.989287	0.998119	0.995777	0.996472	0.997912	0.998809	0.981319	0.979934	0.981533	0.980837	0.989229	0.246625	0.326377	0.248324
068	0127	1.46944	0.448308	1.78653	-0.0042497	0.0236156	1.46944	0.448308	1.78653	0.0042497	0.0236156	3636.81	3100.32	1573.26	1544.41	1316.28	1399.71	1316.28	1314.7	1317.53	1315.38	15.9264	1.85087	-6.14396	0.120342	0.163516	15.9264	1.85087	6.14396	0.120342	0.163516	0.836318	0.955129	0.977364	0.972605	0.987704	0.992745	0.992279	0.995206	0.996691	0.998648	0.902906	0.963942	0.979114	0.97317	0.98849	3.06062	0.809327	0.384913
068	0210	0.874374	0.472998	0.238021	0.101919	0.195846	0.874374	0.472998	0.238021	0.101919	0.195846	1227.98	2429.71	1390.09	1377.53	1228.42	1286.23	1228.42	1239.63	1221.91	1221.28	-65.7097	0.908115	-4.59737	-0.908173	0.0514569	65.7097	0.908115	4.59737	0.908173	0.0514569	0.96046	0.973679	0.984236	0.986059	0.988572	0.881173	0.994903	0.99481	0.997302	0.998728	0.644892	0.978078	0.982363	0.98156	0.988804	20.3928	0.369581	0.309918
068	0473	-0.056825	-0.013348	0.142677	0.052122	0.037344	0.056825	0.013348	0.142677	0.052122	0.037344	1464.71	1462.71	1652.72	1641.06	1467.15	1524.98	1467.15	1460.02	1458.81	1457.49	0.13633	0.708167	-3.8652	0.487282	0.0899792	0.13633	0.708167	3.8652	0.487282	0.0899792	0.978359	0.976586	0.978403	0.977684	0.989771	0.997112	0.996093	0.996524	0.997509	0.998678	0.979025	0.980043	0.981172	0.980065	0.990218	0.34752	0.376317	0.311857
073	0089	0.133105	0.872637	0.0658858	0.151492	0.102717	0.133105	0.872637	0.0658858	0.151492	0.102717	1400.92	1405.4	1610.53	1619.34	1399.31	1497.6	1399.31	1409.36	1353.74	1355.65	-0.319102	-0.545572	-6.78582	-0.715508	-0.140899	0.319102	0.545572	6.78582	0.715508	0.140899	0.982424	0.980284	0.982173	0.985245	0.989526	0.996986	0.992932	0.994062	0.996822	0.998342	0.980853	0.977608	0.97946	0.981718	0.988827	0.442275	0.629679	0.532784
073	0311	-0.512424	-0.629185	-0.199426	-0.501644	-0.484837	0.512424	0.629185	0.199426	0.501644	0.484837	1227.83	1215.42	1480.96	1466.53	1224.91	1298.88	1224.91	1213.54	1178.83	1174.84	1.01576	0.97901	-5.86191	0.932869	0.338885	1.01576	0.97901	5.86191	0.932869	0.338885	0.969544	0.961715	0.966589	0.971274	0.985093	0.997461	0.992186	0.994885	0.997582	0.99863	0.974478	0.966449	0.972301	0.975818	0.986784	0.53373	0.854756	0.603339
073	0312	0.00688445	0.0860569	0.0807997	0.101645	0.055254	0.00688445	0.0860569	0.0807997	0.101645	0.055254	1501.32	1506.57	1728.24	1733.65	1499.46	1583.75	1499.46	1512.5	1472.94	1476.03	-0.348957	-0.312025	-5.46749	-0.865923	-0.209367	0.348957	0.312025	5.46749	0.865923	0.209367	0.979122	0.98007	0.978813	0.982027	0.988384	0.996171	0.99332	0.99232	0.995816	0.997892	0.977411	0.978538	0.974537	0.977772	0.987345	0.533934	0.638818	0.705828
073	0386	0.0717754	-0.0591716	0.156755	0.0515796	0.0675586	0.0717754	0.0591716	0.156755	0.0515796	0.0675586	1379.88	1381.5	1563.9	1566.34	1379.13	1436.66	1379.13	1380.31	1298.21	1299.94	-0.116789	-0.155739	-4.08618	-0.0853432	-0.132931	0.116789	0.155739	4.08618	0.0853432	0.132931	0.981831	0.974652	0.980092	0.981845	0.98832	0.997241	0.99292	0.99388	0.99729	0.998266	0.981249	0.973891	0.977087	0.981419	0.98765	0.467611	0.711717	0.624527
002	0413	-0.0140333	-0.0297767	0.112973	-0.0402056	-0.0903857	0.0140333	0.0297767	0.112973	0.0402056	0.0903857	1380.65	1380.66	1471.6	1467.63	1383.06	1396.74	1383.06	1381.81	1338.86	1339.03	-0.00106946	0.270056	-0.983996	0.0904059	-0.0127608	0.00106946	0.270056	0.983996	0.0904059	0.0127608	0.984935	0.982868	0.982134	0.984039	0.989786	0.997937	0.996461	0.996148	0.997935	0.998633	0.984927	0.984193	0.982687	0.98448	0.989721	0.200221	0.235922	0.292963
006	0498	0.236054	0.159531	0.142463	0.226175	0.186088	0.236054	0.159531	0.142463	0.226175	0.186088	1480.81	1478.26	1614.86	1618.44	1479.51	1517.08	1479.51	1476.88	1456.81	1457.24	0.172581	-0.221486	-2.50744	0.178303	-0.0298232	0.172581	0.221486	2.50744	0.178303	0.0298232	0.979307	0.980572	0.982071	0.980323	0.99032	0.99719	0.993136	0.994004	0.997351	0.998549	0.980155	0.97948	0.980764	0.981197	0.990173	0.31611	0.423971	0.328772
073	0565	-0.0898805	0.442629	0.073197	0.0251885	0.063428	0.0898805	0.442629	0.073197	0.0251885	0.063428	1403.4	1400.87	1624.95	1622.91	1404.38	1456.14	1404.38	1405.65	1345.13	1341.48	0.180662	0.12539	-3.6195	-0.0906131	0.271905	0.180662	0.12539	3.6195	0.0906131	0.271905	0.973264	0.971042	0.965819	0.974334	0.98631	0.996379	0.993129	0.99358	0.996137	0.998478	0.974153	0.971653	0.968105	0.973901	0.987643	0.600889	0.786603	1.10679
082	1256	0.100794	0.391497	0.0747375	0.0385705	0.034226	0.100794	0.391497	0.0747375	0.0385705	0.034226	1259.84	1250.3	1527.69	1526.11	1257.68	1322.29	1257.68	1255.85	1194.98	1192.39	0.75952	0.103273	-5.00887	0.145313	0.217237	0.75952	0.103273	5.00887	0.145313	0.217237	0.973812	0.967802	0.974325	0.977599	0.986713	0.997605	0.991777	0.994743	0.997312	0.998654	0.977508	0.968294	0.975243	0.978308	0.987788	0.47195	0.806255	0.575988
082	1377	1.19812	0.622718	1.16493	1.47972	1.54079	1.19812	0.622718	1.16493	1.47972	1.54079	1623.46	1680.74	1851.95	1916.32	1621.99	1817.03	1621.99	1678.7	1628.5	1635.52	-3.46741	-3.41646	-11.3423	-3.43609	-0.429685	3.46741	3.41646	11.3423	3.43609	0.429685	0.986237	0.97578	0.989976	0.985637	0.989524	0.991564	0.986078	0.988094	0.991526	0.997451	0.969147	0.959124	0.968471	0.968714	0.987409	0.910502	1.53059	1.1339
094	0526	0.138744	-0.187936	-0.127329	-0.152501	-0.147873	0.138744	0.187936	0.127329	0.152501	0.147873	1222.37	1191.24	1295.78	1281.82	1207.39	1167.24	1207.39	1203.26	1101.7	1100.85	2.5799	1.08349	3.38205	0.343096	0.0774775	2.5799	1.08349	3.38205	0.343096	0.0774775	0.956202	0.972632	0.979	0.974649	0.988788	0.997813	0.996873	0.99698	0.997419	0.99889	0.968528	0.977893	0.980432	0.976312	0.989165	0.551767	0.365976	0.274383
094	0692	-0.0881916	-0.352806	0.0058275	-0.122924	-0.124678	0.0881916	0.352806	0.0058275	0.122924	0.124678	1360.39	1337.46	1475.19	1475.47	1364.8	1332.22	1364.8	1336.96	1286.31	1278.21	1.70026	-0.0191588	2.41561	2.06085	0.631369	1.70026	0.0191588	2.41561	2.06085	0.631369	0.967824	0.974255	0.973547	0.9671	0.986	0.997935	0.994383	0.996458	0.998308	0.999023	0.976036	0.974147	0.977518	0.977049	0.989097	0.370337	0.566023	0.384337
094	0711	0.189748	-0.214997	0.118951	0.129811	0.136668	0.189748	0.214997	0.118951	0.129811	0.136668	1443.86	1454.54	1664.71	1656.76	1447.19	1451.28	1447.19	1341.2	1394.88	1395.24	-0.736723	0.479226	-0.282407	7.60229	-0.0260825	0.736723	0.479226	0.282407	7.60229	0.0260825	0.983251	0.96917	0.975485	0.914221	0.989301	0.996524	0.991599	0.992997	0.998188	0.998483	0.979628	0.971488	0.974764	0.948965	0.98917	0.363946	0.621234	0.480553
094	1027	0.168461	0.362112	0.374534	0.374397	0.420799	0.168461	0.362112	0.374534	0.374397	0.420799	1186.41	1192.04	1323.5	1331.98	1186.71	1216.61	1186.71	1191.16	1150.06	1157.22	-0.473324	-0.639133	-2.48825	-0.374527	-0.621033	0.473324	0.639133	2.48825	0.374527	0.621033	0.98609	0.977328	0.979249	0.98466	0.990184	0.997849	0.988042	0.99178	0.997798	0.998212	0.983756	0.974204	0.97838	0.982816	0.987109	0.251735	0.573043	0.38554
094	1090	0.076402	0.110507	0.0888234	0.037179	0.0729455	0.076402	0.110507	0.0888234	0.037179	0.0729455	1488.36	1490.94	1687.92	1684.97	1488.38	1578.33	1488.38	1492.05	1521.56	1522.56	-0.17325	0.174484	-5.86606	-0.246223	-0.065898	0.17325	0.174484	5.86606	0.246223	0.065898	0.983697	0.981188	0.983477	0.985018	0.990296	0.997309	0.995521	0.995583	0.997397	0.998413	0.982837	0.982035	0.98257	0.983797	0.989962	0.252425	0.334322	0.285024
094	1164	-2.27816	-2.78168	-4.02587	-2.82348	-2.99518	2.27816	2.78168	4.02587	2.82348	2.99518	1382.25	1195.01	1445.33	1352.62	1356.28	1207.49	1356.28	1196.14	1156.61	1136.84	14.5303	6.62655	11.6074	12.5479	1.7237	14.5303	6.62655	11.6074	12.5479	1.7237	0.859617	0.922995	0.942912	0.876287	0.976755	0.999325	0.997008	0.998433	0.999243	0.999309	0.922067	0.953572	0.966692	0.931261	0.985171	1.52428	1.06183	0.543112
094	1241	0.0588354	0.304839	-0.0296069	0.0154217	0.0251979	0.0588354	0.304839	0.0296069	0.0154217	0.0251979	1418.24	1424.93	1668.31	1679.94	1417.7	1493.69	1417.7	1424.3	1419.44	1419.74	-0.470518	-0.694442	-5.2201	-0.464257	-0.0210255	0.470518	0.694442	5.2201	0.464257	0.0210255	0.982358	0.980677	0.979665	0.983806	0.98942	0.996846	0.993451	0.995987	0.99706	0.998476	0.980043	0.977281	0.980611	0.98152	0.989314	0.339679	0.493804	0.347737
006	0547	0.282396	-0.0411255	-0.486393	0.0972439	0.146589	0.282396	0.0411255	0.486393	0.0972439	0.146589	1415.24	1378.05	1921.42	1937.21	1416.56	1486.51	1416.56	1379.58	1419.07	1417.04	2.66268	-0.818684	-4.81896	2.6451	0.143694	2.66268	0.818684	4.81896	2.6451	0.143694	0.957352	0.973642	0.972009	0.957797	0.988242	0.997692	0.99134	0.995711	0.997728	0.998538	0.970083	0.969647	0.974308	0.970446	0.988935	0.491823	0.826234	0.496991
094	1267	-0.0412685	0.115207	0.0724909	0.060903	0.085736	0.0412685	0.115207	0.0724909	0.060903	0.085736	1572.35	1573.35	1710.94	1710.25	1571.19	1597.32	1571.19	1573.06	1526.81	1525.57	-0.0634347	0.0403232	-1.64918	-0.119146	0.0809923	0.0634347	0.0403232	1.64918	0.119146	0.0809923	0.981808	0.980064	0.982634	0.982995	0.989488	0.997008	0.994772	0.99538	0.997111	0.998508	0.98149	0.980257	0.981899	0.982404	0.989881	0.287523	0.387521	0.341016
094	1397	0.568466	0.228932	0.385634	0.483241	0.482358	0.568466	0.228932	0.385634	0.483241	0.482358	1349.02	1359.15	1422.4	1433.43	1348.19	1344.65	1348.19	1357.07	1284.61	1284.64	-0.747738	-0.772522	0.262348	-0.65669	-0.00213462	0.747738	0.772522	0.262348	0.65669	0.00213462	0.986461	0.982455	0.984368	0.985474	0.988652	0.997194	0.992696	0.993334	0.997187	0.998565	0.982765	0.978653	0.979719	0.982232	0.988634	0.326866	0.460769	0.409376
094	1402	0.582689	0.352951	0.545384	0.683038	0.566002	0.582689	0.352951	0.545384	0.683038	0.566002	1663.43	1678.92	1859.46	1867.74	1664.97	1714.54	1664.97	1675.12	1703.27	1700.71	-0.926842	-0.44415	-2.93333	-0.607849	0.149962	0.926842	0.44415	2.93333	0.607849	0.149962	0.975793	0.978929	0.975913	0.973537	0.989932	0.994312	0.992959	0.993047	0.994469	0.998501	0.971259	0.976753	0.973976	0.970567	0.99066	0.582397	0.513887	0.530413
098	0149	0.141137	0.195228	0.200804	0.113863	0.153312	0.141137	0.195228	0.200804	0.113863	0.153312	1345.18	1335.41	1688.1	1679.36	1340.86	1494.6	1340.86	1326.9	1401.12	1402.31	0.72907	0.519222	-10.844	1.04648	-0.0842718	0.72907	0.519222	10.844	1.04648	0.0842718	0.961359	0.974084	0.971689	0.96048	0.989375	0.99583	0.995835	0.99567	0.996146	0.998404	0.964854	0.976625	0.973408	0.965497	0.988957	0.733111	0.461649	0.519063
098	0171	-0.0265342	0.112471	0.178299	0.0297693	0.0123875	0.0265342	0.112471	0.178299	0.0297693	0.0123875	1331.15	1329.63	1446.06	1452.78	1331.33	1333.73	1331.33	1328.77	1237.47	1238.54	0.114476	-0.463084	-0.180144	0.192692	-0.0864701	0.114476	0.463084	0.180144	0.192692	0.0864701	0.979919	0.983722	0.978772	0.97756	0.989144	0.997511	0.99522	0.995381	0.997303	0.998579	0.980466	0.981432	0.978215	0.978487	0.988702	0.305497	0.363296	0.391936
098	0172	0.0919352	0.16699	0.222895	0.180607	0.138325	0.0919352	0.16699	0.222895	0.180607	0.138325	1338.01	1338.86	1503.04	1498.59	1338.21	1381.89	1338.21	1340.17	1301.94	1303.09	-0.0635128	0.29712	-3.21186	-0.146171	-0.0883418	0.0635128	0.29712	3.21186	0.146171	0.0883418	0.988171	0.98013	0.985276	0.988323	0.991845	0.998353	0.99497	0.995828	0.998264	0.998842	0.987852	0.981581	0.984823	0.987596	0.991402	0.112578	0.310148	0.215916
098	0896	-1.16339	-1.09882	-1.20324	-1.17509	-1.10171	1.16339	1.09882	1.20324	1.17509	1.10171	1628.05	1586.68	1865.13	1863.27	1629.41	1756.45	1629.41	1593.62	1674.89	1665.04	2.57398	0.100083	-7.50455	2.22095	0.589878	2.57398	0.100083	7.50455	2.22095	0.589878	0.955756	0.975015	0.975085	0.95814	0.985332	0.996883	0.991868	0.992065	0.996701	0.9985	0.968047	0.975506	0.974873	0.968761	0.988242	0.604186	0.59489	0.582424
099	0040	-0.037447	0.382827	-0.024472	0.0651386	-0.0576453	0.037447	0.382827	0.024472	0.0651386	0.0576453	1359.51	1375.12	1508.11	1553.63	1352.07	1441.88	1352.07	1374.64	1346.93	1349.26	-1.14133	-2.97342	-6.42898	-1.65543	-0.173009	1.14133	2.97342	6.42898	1.65543	0.173009	0.975114	0.978131	0.977192	0.976781	0.988742	0.9949	0.987957	0.988984	0.994441	0.998199	0.969538	0.963539	0.963036	0.968698	0.98789	0.795339	1.13997	1.10537
099	0090	-0.479685	-0.527498	-0.154063	-0.504867	-0.559626	0.479685	0.527498	0.154063	0.504867	0.559626	1423.2	1377.72	1613.28	1592.52	1411.45	1460.21	1411.45	1381.8	1346.41	1342.83	3.24764	1.29515	-3.39657	2.12267	0.266339	3.24764	1.29515	3.39657	2.12267	0.266339	0.953196	0.965373	0.967469	0.96457	0.98683	0.997805	0.995305	0.996062	0.997887	0.998541	0.968668	0.971623	0.973433	0.974798	0.988138	0.605964	0.729666	0.568027
099	0352	-0.19528	0.0810613	0.0962609	-0.0257018	-0.0027674	0.19528	0.0810613	0.0962609	0.0257018	0.0027674	1098.39	1104.27	1250.97	1254	1103.79	1188.17	1103.79	1095.61	1091.71	1091.13	-0.5339	-0.242368	-7.36258	0.743894	0.052741	0.5339	0.242368	7.36258	0.743894	0.052741	0.981158	0.97864	0.976106	0.974329	0.98952	0.997331	0.994943	0.995492	0.997975	0.998909	0.978534	0.977449	0.97677	0.977949	0.989777	0.507102	0.538881	0.508609
006	0681	-1.04761	-1.09997	-1.02899	-0.888205	-1.05897	1.04761	1.09997	1.02899	0.888205	1.05897	1262.93	1365.89	1432.57	1464.02	1267.98	1360.36	1267.98	1360.78	1284.77	1298.94	-7.83275	-2.17136	-7.02933	-7.06004	-1.09693	7.83275	2.17136	7.02933	7.06004	1.09693	0.995405	0.986204	0.988326	0.994451	0.993203	0.985113	0.988482	0.987797	0.986325	0.996852	0.95641	0.975486	0.973483	0.959335	0.987744	1.26905	0.576572	0.604827
099	0372	0.00038265	0.078562	-0.0223781	-0.073499	-0.0711693	0.00038265	0.078562	0.0223781	0.073499	0.0711693	1408.4	1440.61	1622.42	1643.14	1404.47	1547.97	1404.47	1431.28	1444.87	1447.45	-2.26092	-1.2687	-9.72075	-1.89077	-0.178274	2.26092	1.2687	9.72075	1.89077	0.178274	0.978554	0.980247	0.982375	0.982824	0.990269	0.993531	0.992837	0.994694	0.994722	0.998267	0.967485	0.974018	0.97839	0.973525	0.989378	0.841179	0.742307	0.603356
099	0470	-0.698444	-1.17878	-0.738066	-0.695142	-0.71218	0.698444	1.17878	0.738066	0.695142	0.71218	1266.8	1258.64	1480.5	1457.93	1270.77	1340.02	1270.77	1251.8	1302.05	1298.74	0.646224	1.53653	-5.30502	1.50427	0.254491	0.646224	1.53653	5.30502	1.50427	0.254491	0.969313	0.965356	0.96681	0.965223	0.986773	0.996859	0.995946	0.996392	0.997419	0.998569	0.972428	0.972758	0.973643	0.972467	0.988011	0.590426	0.535369	0.51151
099	0533	0.05992	-0.131669	-0.0212465	-0.158557	-0.150139	0.05992	0.131669	0.0212465	0.158557	0.150139	1476.29	1483	1681.21	1678.36	1479.92	1588.16	1479.92	1476.51	1424.63	1425.18	-0.453657	0.169441	-7.05547	0.23098	-0.03895	0.453657	0.169441	7.05547	0.23098	0.03895	0.979117	0.979792	0.979082	0.977408	0.987719	0.996075	0.995043	0.995428	0.996858	0.998119	0.976874	0.980612	0.980363	0.978511	0.987503	0.566171	0.548766	0.508603
099	0534	0.0550276	0.0807691	-0.0754474	0.255329	0.220259	0.0550276	0.0807691	0.0754474	0.255329	0.220259	1555.49	1565.38	1732.97	1735.1	1558.16	1634.49	1558.16	1562.35	1525.33	1525.35	-0.633237	-0.122943	-4.78159	-0.268225	-0.00110631	0.633237	0.122943	4.78159	0.268225	0.00110631	0.983428	0.978394	0.982554	0.982514	0.988836	0.996245	0.994545	0.995342	0.99669	0.99821	0.980306	0.977786	0.980781	0.98119	0.988823	0.513128	0.614986	0.527248
099	1144	0.282805	0.749752	-0.0486579	0.283392	0.329047	0.282805	0.749752	0.0486579	0.283392	0.329047	1391.33	1381.01	1576.59	1590.15	1385.56	1446.58	1385.56	1375.38	1379.62	1378.96	0.7445	-0.856519	-4.30906	0.737248	0.0482586	0.7445	0.856519	4.30906	0.737248	0.0482586	0.972716	0.979384	0.975147	0.974072	0.98827	0.997136	0.99404	0.994796	0.997334	0.998392	0.976322	0.975173	0.973409	0.977647	0.988493	0.560678	0.725125	0.708921
109	0967	-0.186544	-0.021217	0.0727609	0.108452	0.105139	0.186544	0.021217	0.0727609	0.108452	0.105139	1331.35	1338.79	1575.55	1538.25	1340.06	1415.13	1340.06	1348.89	1289.06	1290.91	-0.557269	2.39572	-5.44981	-0.657142	-0.143974	0.557269	2.39572	5.44981	0.657142	0.143974	0.980696	0.952372	0.977899	0.981745	0.989032	0.997153	0.99525	0.995606	0.997138	0.99863	0.977957	0.963779	0.976354	0.978513	0.988312	0.498463	0.816594	0.555571
109	1014	0.21791	0.240443	0.813312	0.101593	0.157524	0.21791	0.240443	0.813312	0.101593	0.157524	1347.42	1357.4	1576.36	1580.76	1351	1450.92	1351	1362.38	1337.85	1339.75	-0.738488	-0.278646	-7.13249	-0.838433	-0.141479	0.738488	0.278646	7.13249	0.838433	0.141479	0.978174	0.974368	0.977012	0.979622	0.989598	0.996291	0.993871	0.993797	0.996336	0.998507	0.974523	0.973017	0.972572	0.975476	0.988857	0.537166	0.582328	0.613689
109	1157	-0.539473	-0.549	-0.309646	-0.455898	-0.399135	0.539473	0.549	0.309646	0.455898	0.399135	1908.2	1132.29	1331.67	1320.69	1154.64	1196.09	1154.64	1134.22	1118.82	1114.89	51.0388	0.828365	-3.52678	1.78435	0.352217	51.0388	0.828365	3.52678	1.78435	0.352217	0.572178	0.969852	0.976069	0.968695	0.986144	0.995576	0.994478	0.995502	0.998409	0.998833	0.718187	0.973862	0.977849	0.977324	0.987866	3.79986	0.589576	0.475638
114	0166	0.541156	0.693981	0.243673	0.58173	0.757574	0.541156	0.693981	0.243673	0.58173	0.757574	1311.4	1296.02	1482.72	1503.09	1308.75	1392.72	1308.75	1297.55	1244	1243.29	1.18005	-1.36433	-6.21631	0.859407	0.0569896	1.18005	1.36433	6.21631	0.859407	0.0569896	0.970655	0.978314	0.982179	0.972395	0.988601	0.997633	0.991599	0.992296	0.997446	0.99863	0.976392	0.97165	0.973413	0.976583	0.988894	0.487919	0.886281	0.803833
114	0173	0.173081	0.178821	-0.0647287	0.299938	0.281091	0.173081	0.178821	0.0647287	0.299938	0.281091	1486.57	1486.27	1765.41	1735.96	1504.55	1571.7	1504.55	1493.21	1475.76	1478.03	0.020435	1.68234	-4.36571	0.75669	-0.153997	0.020435	1.68234	4.36571	0.75669	0.153997	0.969366	0.955577	0.978919	0.964655	0.99056	0.99527	0.992567	0.993466	0.995617	0.998305	0.969453	0.963601	0.97531	0.968292	0.989784	0.738299	1.027	0.663123
006	0731	0.389794	0.302771	0.288942	0.237989	0.26669	0.389794	0.302771	0.288942	0.237989	0.26669	1388.27	1393.31	1517.77	1536.06	1388.64	1417.01	1388.64	1392.79	1336.82	1339.05	-0.362637	-1.1978	-2.0224	-0.298195	-0.166094	0.362637	1.1978	2.0224	0.298195	0.166094	0.983964	0.985081	0.983926	0.983708	0.990094	0.997291	0.991297	0.993598	0.997344	0.998473	0.982175	0.979187	0.98109	0.982237	0.989265	0.311932	0.502922	0.367679
114	0374	-0.0521134	-0.201306	-0.184238	-0.118971	-0.13388	0.0521134	0.201306	0.184238	0.118971	0.13388	1327.27	1300.79	1517.91	1500.59	1328.98	1374.42	1328.98	1301.29	1291.74	1288.76	2.01551	1.1473	-3.36192	2.10577	0.23077	2.01551	1.1473	3.36192	2.10577	0.23077	0.961282	0.967158	0.968379	0.960284	0.986967	0.997437	0.994451	0.994496	0.997418	0.998579	0.970956	0.972695	0.972157	0.970383	0.988095	0.640474	0.638199	0.704335
114	0416	0.896928	-0.112966	0.0692724	0.182569	0.0342598	0.896928	0.112966	0.0692724	0.182569	0.0342598	1256.86	1284.71	1399.61	1409.82	1262.38	1300.53	1262.38	1291.78	1197.83	1200.9	-2.19136	-0.726527	-2.97692	-2.30227	-0.255916	2.19136	0.726527	2.97692	2.30227	0.255916	0.978524	0.974705	0.977893	0.980192	0.989074	0.994403	0.991833	0.992889	0.994443	0.998361	0.967795	0.971168	0.973359	0.968897	0.987807	0.882155	0.731339	0.67947
114	0601	-1.20064	-0.136097	-0.0899245	-0.239268	0.0172395	1.20064	0.136097	0.0899245	0.239268	0.0172395	2288.77	1454.01	1600.46	1603.34	1656.34	1479.56	1656.34	1468.75	1350.43	1349.37	44.6061	-0.180255	11.2748	12.0059	0.0787559	44.6061	0.180255	11.2748	12.0059	0.0787559	0.607686	0.978426	0.976588	0.860507	0.987068	0.992803	0.995271	0.995396	0.995383	0.998315	0.743227	0.977556	0.975804	0.912175	0.987472	6.30091	0.628846	0.649017
114	0979	-0.177035	0.102879	-0.063634	0.185357	0.172758	0.177035	0.102879	0.063634	0.185357	0.172758	1373.55	1599.98	1555.9	1557.33	1364.48	1439.44	1364.48	1618.81	1350.85	1349.29	-15.2299	-0.091665	-5.34617	-17.0497	0.11555	15.2299	0.091665	5.34617	17.0497	0.11555	0.97636	0.970183	0.97025	0.97999	0.990316	0.973269	0.992258	0.99515	0.970951	0.998813	0.90201	0.969738	0.974526	0.896447	0.990888	3.50322	0.805237	0.583961
116	0370	0.450266	0.624552	0.27535	0.477702	0.510996	0.450266	0.624552	0.27535	0.477702	0.510996	1222.67	1225.54	1348.53	1358.5	1221.1	1289.55	1221.1	1226.11	1248.6	1247.16	-0.234096	-0.736833	-5.45272	-0.409341	0.115621	0.234096	0.736833	5.45272	0.409341	0.115621	0.979708	0.9831	0.986661	0.98048	0.988958	0.997533	0.995806	0.996362	0.997429	0.998896	0.978559	0.979478	0.982191	0.978471	0.989526	0.324243	0.404427	0.289165
116	0382	0.44828	0.673901	0.25357	0.4196	0.404934	0.44828	0.673901	0.25357	0.4196	0.404934	1314.26	1316.68	1381.28	1387.26	1314.35	1328.15	1314.35	1317.99	1281.97	1283.15	-0.183924	-0.432232	-1.04435	-0.276219	-0.0920191	0.183924	0.432232	1.04435	0.276219	0.0920191	0.980903	0.982424	0.983691	0.982517	0.989725	0.997524	0.995234	0.995354	0.997605	0.998712	0.979988	0.98029	0.980613	0.981146	0.98926	0.28117	0.344942	0.318168
116	0392	-0.858602	-0.579764	-0.872807	-0.532346	-0.603574	0.858602	0.579764	0.872807	0.532346	0.603574	1246.32	1232.43	1391.8	1332.65	1244.4	1270.16	1244.4	1237.74	1238.89	1236.95	1.12083	4.34194	-2.04817	0.537086	0.15685	1.12083	4.34194	2.04817	0.537086	0.15685	0.96234	0.945419	0.96935	0.967127	0.987602	0.997047	0.996925	0.995712	0.996941	0.998804	0.967725	0.965948	0.975232	0.96972	0.988384	0.581327	0.699729	0.381934
116	0487	0.224736	-0.0712593	-0.12456	0.148843	0.104046	0.224736	0.0712593	0.12456	0.148843	0.104046	1205.61	1208.76	1313.57	1316.9	1198.15	1272.95	1198.15	1210.63	1214.91	1220.89	-0.260617	-0.25308	-6.05427	-1.03622	-0.49067	0.260617	0.25308	6.05427	1.03622	0.49067	0.976866	0.981229	0.986457	0.986285	0.991347	0.997238	0.996628	0.997436	0.997428	0.998531	0.975593	0.979988	0.984823	0.981175	0.988914	0.449623	0.36857	0.273568
116	0648	-0.048016	-0.55425	-0.912122	-0.0172745	-0.0081355	0.048016	0.55425	0.912122	0.0172745	0.0081355	1509.54	1496.97	1581.88	1582.86	1508.98	1517.05	1508.98	1497.03	1479.43	1479	0.835889	-0.0623866	-0.533473	0.795049	0.0293758	0.835889	0.0623866	0.533473	0.795049	0.0293758	0.978303	0.981598	0.981458	0.978881	0.988167	0.998154	0.996098	0.996319	0.998179	0.998443	0.982395	0.981289	0.981289	0.982775	0.988314	0.240224	0.332381	0.310642
116	0657	0.265022	-0.0945744	0.13187	0.197787	0.253806	0.265022	0.0945744	0.13187	0.197787	0.253806	1414.07	1422.41	1539.3	1535.43	1403.99	1472.71	1403.99	1424.72	1437.15	1436.07	-0.588309	0.251569	-4.77794	-1.46553	0.07481	0.588309	0.251569	4.77794	1.46553	0.07481	0.976233	0.976782	0.984377	0.97492	0.988047	0.996201	0.996239	0.991337	0.994937	0.998543	0.973382	0.978032	0.966653	0.967797	0.988439	0.506648	0.37846	0.790894
007	0068	0.792372	0.42044	0.600109	0.471712	0.52166	0.792372	0.42044	0.600109	0.471712	0.52166	1241.71	1249.44	1428.08	1437.15	1241.74	1322	1241.74	1246.61	1238.02	1240.52	-0.620242	-0.633425	-6.2615	-0.391554	-0.202041	0.620242	0.633425	6.2615	0.391554	0.202041	0.982437	0.983198	0.983846	0.981915	0.990353	0.997118	0.995374	0.995222	0.997333	0.998595	0.979408	0.980113	0.978795	0.98001	0.98938	0.345064	0.392052	0.404197
116	1232	0.332868	0.0451857	0.172363	0.191876	0.231461	0.332868	0.0451857	0.172363	0.191876	0.231461	1293.89	1283.93	1389.19	1381.08	1288.8	1318.77	1288.8	1285.02	1270.05	1266.49	0.773109	0.585848	-2.29812	0.294382	0.28083	0.773109	0.585848	2.29812	0.294382	0.28083	0.978768	0.978217	0.980952	0.982144	0.987267	0.99843	0.997141	0.997533	0.998277	0.998872	0.982554	0.981086	0.983168	0.983591	0.988655	0.16667	0.269858	0.201633
116	1249	0.077919	-0.332562	-0.265624	0.39	0.439342	0.077919	0.332562	0.265624	0.39	0.439342	1260.85	1230.51	1338.68	1334.57	1261.98	1258.08	1261.98	1242.83	1224.74	1222.92	2.43521	0.307646	0.309691	1.52905	0.148217	2.43521	0.307646	0.309691	1.52905	0.148217	0.96049	0.976	0.977206	0.967743	0.985533	0.998256	0.995622	0.995705	0.99807	0.99858	0.972179	0.977487	0.977527	0.975133	0.986254	0.37833	0.379685	0.346758
123	0072	-0.752707	-0.629253	-0.3935	-1.08387	-0.762521	0.752707	0.629253	0.3935	1.08387	0.762521	2430.72	1479.95	1838.09	1718.24	2442.22	1483.84	2442.22	1478.53	1408.88	1403.14	48.6246	6.74053	48.8211	49.158	0.408295	48.6246	6.74053	48.8211	49.158	0.408295	0.598028	0.919608	0.964403	0.595609	0.987144	0.99718	0.994941	0.99622	0.997432	0.998806	0.743428	0.950616	0.974668	0.742008	0.989167	4.2671	1.0993	0.380597
123	0088	0.367041	0.202103	0.353739	0.255084	0.284678	0.367041	0.202103	0.353739	0.255084	0.284678	1414.68	1426.88	1541.54	1555.18	1408.04	1438.12	1408.04	1426.47	1374.1	1377.45	-0.858729	-0.881222	-2.1139	-1.30045	-0.24317	0.858729	0.881222	2.1139	1.30045	0.24317	0.979971	0.97698	0.980866	0.979634	0.988736	0.996076	0.99238	0.993903	0.995444	0.998185	0.975757	0.972678	0.976502	0.973258	0.987531	0.434218	0.597085	0.446133
123	0091		-0.253164	0.203506	0.0716679	0.127026		0.253164	0.203506	0.0716679	0.127026	1292.22	1297.38	1407.68	1406.2	1293.32	1308.82	1293.32	1293.57	1240.74	1239.74	-0.398399	0.105099	-1.19162	-0.0192437	0.0808721	0.398399	0.105099	1.19162	0.0192437	0.0808721	0.986057	0.975455	0.985923	0.983621	0.988926	0.997782	0.994246	0.995654	0.997948	0.998786	0.984085	0.97598	0.983246	0.983518	0.989318	0.235856	0.556141	0.32112
123	0094	-0.0483455	-0.781116	-1.19281	-0.176189	-0.118527	0.0483455	0.781116	1.19281	0.176189	0.118527	1512.22	1412.76	1685.01	1618.76	1515.1	1440.35	1515.1	1411.08	1390.87	1380.17	6.8003	4.01084	5.05867	7.10958	0.772562	6.8003	4.01084	5.05867	7.10958	0.772562	0.921942	0.944673	0.947553	0.919124	0.981497	0.998181	0.99549	0.996335	0.998187	0.998545	0.953277	0.963589	0.965551	0.951784	0.985273	0.820208	0.685607	0.577377
123	0106	0.15797	0.165262	0.0391532	0.118464	0.13798	0.15797	0.165262	0.0391532	0.118464	0.13798	1581.23	1599.06	1768.58	1773.85	1585.47	1650.58	1585.47	1590.61	1573.1	1574.95	-1.12138	-0.297075	-4.02408	-0.323571	-0.117596	1.12138	0.297075	4.02408	0.323571	0.117596	0.98287	0.977503	0.984741	0.976772	0.989777	0.995582	0.992631	0.990426	0.99587	0.998238	0.977356	0.97605	0.97408	0.975187	0.989194	0.443947	0.532848	0.624036
123	0113	0.0559056	0.648331	0.545794	-0.11024	-0.147748	0.0559056	0.648331	0.545794	0.11024	0.147748	1531.02	1537.31	1707.67	1712.3	1534.99	1623.46	1534.99	1530.67	1510.63	1512.74	-0.410143	-0.271199	-5.60222	0.281763	-0.139887	0.410143	0.271199	5.60222	0.281763	0.139887	0.975645	0.974485	0.982436	0.972487	0.990518	0.995734	0.993147	0.993905	0.996287	0.998392	0.973639	0.973155	0.977797	0.973852	0.989818	0.506003	0.564302	0.504268
123	0162	1.13937	1.80367	1.03124	1.06634	1.07215	1.13937	1.80367	1.03124	1.06634	1.07215	1569.46	1628.9	1658.4	1706.22	1569.92	1594.27	1569.92	1626.95	1503.79	1515.21	-3.71704	-2.84236	-1.53897	-3.56786	-0.756691	3.71704	2.84236	1.53897	3.56786	0.756691	0.985757	0.98557	0.984236	0.986304	0.99105	0.991968	0.987698	0.990845	0.992287	0.997571	0.967442	0.971563	0.975019	0.968711	0.987297	0.932005	0.826301	0.637567
123	0298	-0.294434	0.484991	0.294785	0.144375	0.137003	0.294434	0.484991	0.294785	0.144375	0.137003	1470.06	1481.21	1525.33	1536	1468.05	1420.38	1468.05	1466.85	1327.03	1326.93	-0.754974	-0.69724	3.30018	0.0813593	0.00755065	0.754974	0.69724	3.30018	0.0813593	0.00755065	0.976888	0.978411	0.97787	0.975767	0.988806	0.995614	0.993698	0.994745	0.996658	0.998586	0.973209	0.975002	0.97593	0.97617	0.988851	0.55629	0.535488	0.427671
007	0070	0.14939	0.339363	0.0036005	-0.0819525	0.139816	0.14939	0.339363	0.0036005	0.0819525	0.139816	1467.3	1469.76	1675.04	1666.48	1467.75	1550.67	1467.75	1469.99	1494.79	1493.38	-0.167483	0.511953	-5.49395	-0.152365	0.0945211	0.167483	0.511953	5.49395	0.152365	0.0945211	0.980548	0.978969	0.981307	0.978115	0.989791	0.996902	0.996398	0.996019	0.996566	0.998612	0.979728	0.981472	0.980983	0.97737	0.990258	0.352944	0.330906	0.336743
126	0605	0.0984875	-0.104356	0.0796769	-0.0792818	0.0776248	0.0984875	0.104356	0.0796769	0.0792818	0.0776248	1549.1	1552.45	1812.32	1813.38	1549.36	1610.51	1549.36	1550.26	1546.58	1543.88	-0.215865	-0.058353	-3.87045	-0.0575726	0.174868	0.215865	0.058353	3.87045	0.0575726	0.174868	0.981378	0.980598	0.976723	0.978565	0.988625	0.996747	0.99347	0.993653	0.996554	0.998491	0.98029	0.980282	0.977002	0.978254	0.989462	0.34659	0.404155	0.415729
126	0606	0.466218	0.326128	0.536442	0.417966	0.339394	0.466218	0.326128	0.536442	0.417966	0.339394	1358.6	1301.27	1445.08	1419.68	1374.93	1289.38	1374.93	1299.21	1253.31	1250.03	4.31063	1.77335	6.42157	5.66332	0.261551	4.31063	1.77335	6.42157	5.66332	0.261551	0.943779	0.967089	0.977611	0.932253	0.988942	0.998114	0.996807	0.997315	0.998272	0.998962	0.96411	0.975653	0.981404	0.958641	0.990226	0.64677	0.399209	0.272927
126	0680	0.0384955	-0.0148055	0.124239	0.160892	0.167319	0.0384955	0.0148055	0.124239	0.160892	0.167319	1330.17	1332.39	1475.85	1479.78	1330.34	1369.73	1330.34	1333.42	1288.69	1286.49	-0.166686	-0.265632	-2.91783	-0.231466	0.170786	0.166686	0.265632	2.91783	0.231466	0.170786	0.983926	0.983268	0.980692	0.983218	0.989036	0.997671	0.994849	0.995386	0.997493	0.998827	0.983097	0.981953	0.980802	0.982071	0.989873	0.261365	0.337357	0.310712
126	0784		0.114464	0.037491	0.0882188	0.0135765		0.114464	0.037491	0.0882188	0.0135765	1272.83	1340.31	1379.57	1364.1	1273.59	1230.7	1273.59	1327.27	1159.86	1160.46	-5.16449	1.12739	3.42526	-4.12781	-0.0514544	5.16449	1.12739	3.42526	4.12781	0.0514544	0.990075	0.971239	0.985198	0.989363	0.992664	0.992147	0.995787	0.996823	0.993409	0.999117	0.964509	0.976714	0.984988	0.968943	0.992408	1.20993	0.530028	0.236845
126	0891	-0.116569	-0.179731	-0.108252	-0.140823	-0.0503695	0.116569	0.179731	0.108252	0.140823	0.0503695	1335.45	1331.86	1431.66	1451.91	1333.01	1316.07	1333.01	1334.3	1249.88	1249.22	0.269434	-1.40509	1.27892	-0.0967181	0.0526691	0.269434	1.40509	1.27892	0.0967181	0.0526691	0.976275	0.983324	0.979264	0.97792	0.988142	0.997226	0.991298	0.993974	0.996967	0.998612	0.977579	0.976404	0.977735	0.977435	0.988391	0.399515	0.556989	0.456243
126	1221	-0.0704242	-0.207462	-0.00369575	-0.148903	-0.163836	0.0704242	0.207462	0.00369575	0.148903	0.163836	1755.58	1576.84	1913.15	1714.38	1759.24	1577.32	1759.24	1580.37	1549.03	1535.66	10.727	10.9589	10.9046	10.7117	0.867154	10.727	10.9589	10.9046	10.7117	0.867154	0.886642	0.884137	0.965984	0.887158	0.982496	0.997915	0.996182	0.996397	0.997979	0.998618	0.934201	0.932587	0.975704	0.934678	0.986762	1.46907	1.80675	0.424573
127	0259	-0.138437	-0.146817	0.023062	0.160141	0.191275	0.138437	0.146817	0.023062	0.160141	0.191275	1355.26	1356.29	1500.48	1511.89	1353.85	1329.08	1353.85	1355.09	1285.2	1283.93	-0.0764698	-0.757238	1.84689	-0.0914938	0.0995108	0.0764698	0.757238	1.84689	0.0914938	0.0995108	0.973441	0.972502	0.974887	0.974277	0.986684	0.99635	0.990912	0.994865	0.996446	0.998453	0.973103	0.968847	0.975938	0.973865	0.987202	0.524853	0.779932	0.422644
127	0260	0.0913002	0.143544	0.20328	0.0589475	0.0834132	0.0913002	0.143544	0.20328	0.0589475	0.0834132	1232.19	1230.52	1374.07	1383.22	1233.85	1272.23	1233.85	1231.59	1179.05	1179.82	0.135416	-0.663501	-3.06319	0.183264	-0.0657258	0.135416	0.663501	3.06319	0.183264	0.0657258	0.978388	0.981326	0.984039	0.979017	0.989146	0.997565	0.993811	0.994781	0.997695	0.998682	0.979059	0.978076	0.980246	0.979924	0.988822	0.34568	0.448116	0.365497
127	0431	-0.007125	-0.244872	0.0323516	0.0281895	0.0865721	0.007125	0.244872	0.0323516	0.0281895	0.0865721	1483.07	1477.37	1629.84	1635.28	1483.83	1510.42	1483.83	1473.9	1480.42	1480.36	0.384833	-0.333159	-1.77632	0.671025	0.00441712	0.384833	0.333159	1.77632	0.671025	0.00441712	0.97706	0.979975	0.977156	0.975568	0.989077	0.997162	0.993624	0.994169	0.997362	0.998386	0.978932	0.978333	0.976809	0.978833	0.989091	0.317213	0.466013	0.413219
127	0622	-0.269987	-0.0200018	-0.212261	-0.307138	-0.24587	0.269987	0.0200018	0.212261	0.307138	0.24587	1282.98	1235.81	1544.59	1539.42	1284.46	1262.75	1284.46	1233.28	1194.56	1193.59	3.74518	0.335489	1.70462	4.06588	0.0810841	3.74518	0.335489	1.70462	4.06588	0.0810841	0.94699	0.973927	0.973361	0.945723	0.98778	0.997947	0.991325	0.993092	0.998174	0.998667	0.964694	0.975528	0.974819	0.964919	0.988148	0.594104	0.499443	0.445045
007	0316	0.0742374	-0.307888	0.132672	0.169841	0.125937	0.0742374	0.307888	0.132672	0.169841	0.125937	1432.45	1462.99	1547.77	1560.87	1431.75	1429.67	1431.75	1457.39	1391.59	1393.71	-2.10963	-0.843034	0.145167	-1.77517	-0.152373	2.10963	0.843034	0.145167	1.77517	0.152373	0.985867	0.982235	0.983144	0.985221	0.990113	0.994943	0.994953	0.995889	0.99534	0.998426	0.975472	0.978096	0.979812	0.976479	0.989363	0.561132	0.470702	0.384167
127	0684	0.0703705	0.101688	-0.0036065	-8.9e-05	0.0226475	0.0703705	0.101688	0.0036065	8.9e-05	0.0226475	1329.88	1326.8	1498.43	1501.07	1327.45	1388.7	1327.45	1330.92	1331.75	1331.37	0.231686	-0.17567	-4.50957	-0.260738	0.0289897	0.231686	0.17567	4.50957	0.260738	0.0289897	0.981611	0.981978	0.982157	0.984507	0.989511	0.997893	0.994831	0.995223	0.997632	0.998661	0.982749	0.981114	0.98102	0.983225	0.989654	0.229517	0.34966	0.303873
127	0754	0.20161	0.177302	0.244739	0.363708	0.357115	0.20161	0.177302	0.244739	0.363708	0.357115	1456.98	1460.47	1579.45	1590.52	1457.6	1470.85	1457.6	1459.58	1409.68	1415.13	-0.239175	-0.698364	-0.904836	-0.136085	-0.385313	0.239175	0.698364	0.904836	0.136085	0.385313	0.98123	0.984881	0.985219	0.981424	0.991469	0.996925	0.994342	0.995146	0.997101	0.998268	0.980068	0.981453	0.982224	0.980765	0.98957	0.32983	0.391012	0.304349
127	0844	0.0480274	0.0698549	0.111084	0.119164	0.115894	0.0480274	0.0698549	0.111084	0.119164	0.115894	1293.12	1301.86	1451.38	1458.78	1289.24	1347.31	1289.24	1297.61	1303.08	1301.57	-0.674192	-0.509194	-4.40514	-0.646874	0.115646	0.674192	0.509194	4.40514	0.646874	0.115646	0.98059	0.981977	0.980997	0.982802	0.98868	0.996674	0.994377	0.994009	0.997	0.998696	0.97728	0.979471	0.976947	0.979618	0.989246	0.37259	0.401131	0.434096
127	1382	0.0836964	0.348519	0.119746	0.0584579	0.0925539	0.0836964	0.348519	0.119746	0.0584579	0.0925539	1574.16	1569.25	2029.17	2028.6	1563.74	1758.96	1563.74	1567.76	1714.28	1714.22	0.312507	0.028331	-11.7506	-0.257113	0.00338387	0.312507	0.028331	11.7506	0.257113	0.00338387	0.966096	0.978656	0.97071	0.972758	0.988782	0.995108	0.992894	0.991224	0.995298	0.998038	0.967615	0.978796	0.969668	0.971516	0.988806	0.554435	0.504209	0.6814
007	1206	1.60221	1.43948	1.43731	1.52886	1.49979	1.60221	1.43948	1.43731	1.52886	1.49979	1557.56	1573.32	1719.04	1763.28	1552.42	1631.02	1552.42	1572.65	1566.07	1574.21	-1.00662	-2.54107	-4.93804	-1.29496	-0.518294	1.00662	2.54107	4.93804	1.29496	0.518294	0.981353	0.98733	0.986511	0.981771	0.991588	0.99548	0.991057	0.992844	0.995107	0.997847	0.976407	0.974784	0.976698	0.97541	0.989011	0.462552	0.72406	0.561006
128	1242	-0.112902	0.13486	0.0201124	-0.112468	-0.0698167	0.112902	0.13486	0.0201124	0.112468	0.0698167	1244.81	1245.88	1445.2	1443	1241.09	1308.09	1241.09	1243.64	1205.1	1206.06	-0.0864217	0.15243	-5.25664	-0.205707	-0.0790076	0.0864217	0.15243	5.25664	0.205707	0.0790076	0.983916	0.978841	0.979153	0.985954	0.991018	0.99785	0.995308	0.996006	0.997964	0.998805	0.983491	0.979587	0.980136	0.98494	0.990626	0.406253	0.509301	0.474536
129	0778	-0.0473061	-0.76064	0.108354	-0.066499	-0.0468044	0.0473061	0.76064	0.108354	0.066499	0.0468044	1383.39	1377.06	1514.55	1521.72	1359.65	1420.68	1359.65	1392.2	1379.12	1382.56	0.458333	-0.472344	-4.38994	-2.36528	-0.249152	0.458333	0.472344	4.38994	2.36528	0.249152	0.972453	0.983181	0.981279	0.982325	0.990532	0.997126	0.995446	0.995083	0.994895	0.998509	0.974682	0.980859	0.978046	0.970707	0.989298	0.394834	0.341863	0.370964
007	1222	0.270729	-0.684018	0.358803	0.221024	0.25245	0.270729	0.684018	0.358803	0.221024	0.25245	1207.59	1208.1	1390.02	1396.57	1203.8	1285.58	1203.8	1198.1	1211.63	1212.55	-0.0419135	-0.470308	-6.57034	0.473795	-0.0759629	0.0419135	0.470308	6.57034	0.473795	0.0759629	0.975159	0.976746	0.980145	0.971464	0.987953	0.997026	0.994701	0.994743	0.997205	0.998485	0.974945	0.974443	0.974796	0.973749	0.987564	0.396064	0.534965	0.502516
130	0232	0.414005	0.561248	0.304553	-0.0412488	0.0308453	0.414005	0.561248	0.304553	0.0412488	0.0308453	1457.31	1468.65	1709.01	1705.11	1453.78	1547.98	1453.78	1467.38	1482.04	1479.96	-0.774986	0.228236	-6.27638	-0.931511	0.140574	0.774986	0.228236	6.27638	0.931511	0.140574	0.98366	0.97625	0.979704	0.981662	0.988833	0.996494	0.99522	0.995171	0.995985	0.998556	0.979859	0.977369	0.97762	0.977102	0.989541	0.358087	0.497154	0.439709
130	0886	0.250796	0.199242	0.221945	0.209077	0.154718	0.250796	0.199242	0.221945	0.209077	0.154718	1248.36	1241.72	1490.46	1504.22	1245.83	1320.9	1245.83	1244.51	1239.11	1237.05	0.533511	-0.919067	-5.84905	0.105962	0.166711	0.533511	0.919067	5.84905	0.105962	0.166711	0.981281	0.98212	0.979561	0.982992	0.988132	0.998359	0.993466	0.995855	0.998052	0.99876	0.983878	0.977586	0.979796	0.983491	0.988936	0.164075	0.472792	0.333343
130	0956	-0.0458795	0.030342	0.0652525	0.020146	0.0473715	0.0458795	0.030342	0.0652525	0.020146	0.0473715	1337.04	1332.47	1509.1	1513.81	1333.33	1394.91	1333.33	1332.24	1295.78	1295.31	0.341908	-0.311496	-4.51433	0.0822995	0.0361454	0.341908	0.311496	4.51433	0.0822995	0.0361454	0.980555	0.985268	0.985963	0.985441	0.992114	0.997885	0.994382	0.995653	0.998194	0.999042	0.982231	0.983733	0.985327	0.985847	0.992293	0.232011	0.278805	0.227158
130	0969	-0.189015	-0.052136	-0.0797501	-0.0005745	-0.0100975	0.189015	0.052136	0.0797501	0.0005745	0.0100975	1453.72	1471.08	1626.58	1615.21	1469.79	1467.22	1469.79	1466.86	1392.75	1394.01	-1.1871	0.701695	0.175083	0.200117	-0.0903773	1.1871	0.701695	0.175083	0.200117	0.0903773	0.979509	0.977751	0.975958	0.977084	0.991235	0.995295	0.996629	0.997003	0.996927	0.998664	0.973696	0.981181	0.980293	0.978062	0.990787	0.489088	0.306838	0.287704
130	1200	0.76264	1.2128	0.742162	0.871367	0.824364	0.76264	1.2128	0.742162	0.871367	0.824364	1526.78	1547.5	1816.57	1868.61	1520.31	1647.78	1520.31	1541.13	1571.74	1572	-1.34778	-2.82459	-8.04754	-1.36059	-0.0162376	1.34778	2.82459	8.04754	1.36059	0.0162376	0.978165	0.983363	0.980612	0.978718	0.988819	0.99457	0.988223	0.993585	0.994663	0.998204	0.971587	0.969493	0.976344	0.972079	0.988752	0.501919	0.896368	0.488059
130	1201	-0.104266	0.206619	0.04383	0.0629399	0.104097	0.104266	0.206619	0.04383	0.0629399	0.104097	1413.73	1401.7	1641.05	1629.41	1409.65	1448.33	1409.65	1400.05	1417.52	1413.82	0.854261	0.712184	-2.7069	0.683407	0.261498	0.854261	0.712184	2.7069	0.683407	0.261498	0.952788	0.966139	0.975622	0.964567	0.986621	0.99456	0.992912	0.991995	0.99599	0.998485	0.956854	0.969591	0.970091	0.967859	0.987921	0.854262	0.714258	0.66872
130	1290	0.120918	-0.0776124	0.153679	0.0494983	0.0966287	0.120918	0.0776124	0.153679	0.0494983	0.0966287	1275.38	1268.12	1415.56	1414.11	1275.93	1302.6	1275.93	1270.53	1228.53	1225.74	0.570489	0.102872	-2.06877	0.424202	0.227588	0.570489	0.102872	2.06877	0.424202	0.227588	0.975746	0.975607	0.976749	0.976295	0.98757	0.99768	0.993208	0.99468	0.997565	0.998785	0.978535	0.976089	0.97819	0.978371	0.988706	0.324274	0.441113	0.376792
130	1337	-0.030071	0.0518435	0.0702373	0.0785307	0.0547541	0.030071	0.0518435	0.0702373	0.0785307	0.0547541	1448.77	1454.03	1629.67	1634.05	1454.21	1533.27	1454.21	1457.62	1441.29	1441.06	-0.362607	-0.268284	-5.29259	-0.233914	0.0161002	0.362607	0.268284	5.29259	0.233914	0.0161002	0.979088	0.983653	0.983598	0.979867	0.990036	0.996451	0.995617	0.996314	0.996736	0.99859	0.977307	0.982328	0.98317	0.978715	0.990109	0.43956	0.336531	0.27151
131	0123	-0.695721	0.373316	0.239151	0.109655	0.11833	0.695721	0.373316	0.239151	0.109655	0.11833	1307.18	1302.45	1489.89	1469.3	1310.44	1337.07	1310.44	1304.35	1271.51	1267.36	0.362928	1.392	-2.0118	0.465472	0.326933	0.362928	1.392	2.0118	0.465472	0.326933	0.975717	0.965668	0.977418	0.976206	0.987608	0.997338	0.995358	0.995874	0.997526	0.998858	0.977467	0.972371	0.978303	0.978458	0.989203	0.349068	0.521514	0.359077
131	0441	0.381308	0.188281	0.457699	0.296338	0.333769	0.381308	0.188281	0.457699	0.296338	0.333769	1306.9	1310.43	1473.17	1474.54	1305.76	1368.3	1305.76	1310.32	1292.92	1290.95	-0.269582	-0.0927413	-4.67772	-0.349052	0.152415	0.269582	0.0927413	4.67772	0.349052	0.152415	0.982058	0.974879	0.984285	0.982044	0.988188	0.99735	0.99562	0.996418	0.997249	0.998695	0.980747	0.974431	0.980513	0.980345	0.988949	0.330763	0.584804	0.411971
007	1339	0.0848708	-0.213818	-0.0102682	-0.022042	6.5e-06	0.0848708	0.213818	0.0102682	0.022042	6.5e-06	1525.82	1496.67	1652.32	1636.34	1524.47	1502.71	1524.47	1497.79	1453.38	1450.01	1.92869	0.971414	1.43769	1.76581	0.232197	1.92869	0.971414	1.43769	1.76581	0.232197	0.968598	0.971092	0.958648	0.969349	0.987629	0.998114	0.994407	0.99647	0.997987	0.998542	0.977941	0.975811	0.972327	0.977911	0.988776	0.311757	0.471819	0.726133
131	0457	0.129505	0.207667	0.0553449	-0.01808	-0.0852652	0.129505	0.207667	0.0553449	0.01808	0.0852652	1129.3	1135.92	1269.47	1274.58	1122.08	1145.43	1122.08	1134.19	1095.66	1095.5	-0.584236	-0.401303	-2.05962	-1.07373	0.0141513	0.584236	0.401303	2.05962	1.07373	0.0141513	0.976534	0.977328	0.981073	0.979403	0.989234	0.996801	0.994489	0.996043	0.9966	0.998879	0.973691	0.975368	0.979694	0.974155	0.989309	0.442559	0.486651	0.338602
131	0497	0.108221	0.62287	0.653924	0.138016	0.00919343	0.108221	0.62287	0.653924	0.138016	0.00919343	1459.91	1525.17	1784.26	1801.47	1468.24	1616.41	1468.24	1526.31	1601.04	1600.48	-4.37276	-0.960036	-9.60695	-3.87796	0.0351873	4.37276	0.960036	9.60695	3.87796	0.0351873	0.981065	0.976252	0.974994	0.980877	0.988913	0.990722	0.992891	0.996093	0.991391	0.998259	0.959615	0.971563	0.977165	0.961857	0.989086	0.879319	0.773082	0.384117
131	1301	0.0462419	-0.0323239	-0.0202513	0.036688	0.00837235	0.0462419	0.0323239	0.0202513	0.036688	0.00837235	1520.57	1540.64	1719.55	1721.4	1559.72	1533.23	1559.72	1542.41	1439.23	1439.16	-1.31157	-0.107524	1.713	1.11591	0.00512983	1.31157	0.107524	1.713	1.11591	0.00512983	0.972323	0.976759	0.977406	0.963391	0.989247	0.993748	0.993617	0.994903	0.995977	0.998459	0.965926	0.97621	0.977484	0.968737	0.989252	0.802202	0.499704	0.411858
133	0433	-0.177751	-0.283245	-0.0613387	-0.170769	-0.142502	0.177751	0.283245	0.0613387	0.170769	0.142502	1278.56	1263.48	1289.68	1289.31	1263.82	1199.52	1263.82	1265.75	1166.67	1165.89	1.18677	0.0286267	5.22052	-0.152268	0.0663769	1.18677	0.0286267	5.22052	0.152268	0.0663769	0.96704	0.979537	0.980693	0.976402	0.989282	0.997348	0.99448	0.994147	0.996893	0.998864	0.972787	0.979681	0.978612	0.975669	0.989617	0.479217	0.394512	0.373253
133	0525	-0.315121	-0.326113	-0.191854	-0.224166	-0.221574	0.315121	0.326113	0.191854	0.224166	0.221574	1215.98	1214.7	1278.67	1281.51	1218.73	1211.25	1218.73	1215.43	1148.98	1148.86	0.105179	-0.221963	0.615782	0.271151	0.010924	0.105179	0.221963	0.615782	0.271151	0.010924	0.979509	0.981863	0.978715	0.979172	0.988327	0.997704	0.995854	0.996546	0.997857	0.998722	0.98006	0.980795	0.980332	0.980542	0.988418	0.338379	0.356171	0.318126
133	1055	-0.758943	-1.44268	-1.44923	-0.471002	-0.401909	0.758943	1.44268	1.44923	0.471002	0.401909	1351.66	1326.53	1569.75	1549.1	1351.47	1379.22	1351.47	1321.47	1360.58	1359.67	1.87696	1.32419	-2.03219	2.24469	0.0669976	1.87696	1.32419	2.03219	2.24469	0.0669976	0.960716	0.963708	0.961944	0.956474	0.988122	0.997241	0.994976	0.995511	0.997155	0.998498	0.969744	0.970101	0.968892	0.96722	0.988473	0.538201	0.640797	0.573254
133	1170	-1.59236	-1.54787	-1.53216	-1.60363	-1.5296	1.59236	1.54787	1.53216	1.60363	1.5296	1251.14	1314.74	1424.76	1494.05	1237.68	1333.68	1237.68	1313.94	1280.51	1300.55	-4.95768	-4.7473	-7.46719	-5.9774	-1.55317	4.95768	4.7473	7.46719	5.9774	1.55317	0.989061	0.983794	0.985565	0.991021	0.993384	0.989544	0.981966	0.985102	0.988214	0.996198	0.964827	0.961083	0.963429	0.961759	0.985974	0.796281	1.08411	0.892071
136	0086	1.37042	1.0145	1.16997	1.62315	1.65339	1.37042	1.0145	1.16997	1.62315	1.65339	1330.61	1359.16	1442.56	1476.1	1336.63	1353.58	1336.63	1359.88	1269.52	1272.93	-2.12312	-2.29825	-1.25978	-1.72449	-0.268629	2.12312	2.29825	1.25978	1.72449	0.268629	0.987136	0.981065	0.986337	0.98544	0.990201	0.995493	0.989859	0.991374	0.995783	0.998443	0.976642	0.969777	0.973474	0.976928	0.988857	0.508056	0.946945	0.605715
136	0184	0.244072	0.102232	0.27618	0.133155	0.139363	0.244072	0.102232	0.27618	0.133155	0.139363	1186	1184.45	1296.78	1312.92	1185.42	1219.57	1185.42	1183.12	1113.4	1114.75	0.130543	-1.23659	-2.84045	0.193969	-0.121082	0.130543	1.23659	2.84045	0.193969	0.121082	0.980081	0.979163	0.984097	0.979726	0.987225	0.997854	0.993283	0.995658	0.997887	0.998496	0.980719	0.973109	0.980444	0.980674	0.986622	0.270729	0.622431	0.370187
136	0186	-0.0044125	-0.17872	0.0896161	0.132426	0.145312	0.0044125	0.17872	0.0896161	0.132426	0.145312	1413.88	1411.89	1558.56	1559.37	1408.96	1441.54	1408.96	1412.2	1375.54	1376.93	0.141383	-0.0521604	-2.28583	-0.229319	-0.101083	0.141383	0.0521604	2.28583	0.229319	0.101083	0.981801	0.979393	0.983219	0.98329	0.990229	0.997641	0.995078	0.996053	0.997339	0.998531	0.982495	0.979138	0.982286	0.982163	0.989729	0.248999	0.409869	0.282244
002	0559	0.583857	0.0760904	0.155199	0.24947	0.270253	0.583857	0.0760904	0.155199	0.24947	0.270253	1487.27	1505.17	1716.55	1726.91	1488.28	1577.83	1488.28	1499.77	1505.2	1507.57	-1.19636	-0.601549	-5.84139	-0.768979	-0.157112	1.19636	0.601549	5.84139	0.768979	0.157112	0.977904	0.977767	0.979133	0.975834	0.989964	0.994918	0.992612	0.994283	0.995248	0.998247	0.972057	0.97483	0.977407	0.972083	0.989187	0.56546	0.583825	0.467152
010	0067	0.202614	0.136449	0.270746	0.120294	0.155145	0.202614	0.136449	0.270746	0.120294	0.155145	1396.59	1405.16	1553.5	1553.29	1401.12	1449.12	1401.12	1402.46	1370.58	1368.62	-0.611487	0.0131152	-3.36828	-0.0959291	0.142782	0.611487	0.0131152	3.36828	0.0959291	0.142782	0.979286	0.976939	0.97517	0.977666	0.987788	0.996381	0.992879	0.993471	0.996848	0.998578	0.9763	0.977001	0.976084	0.977203	0.988502	0.411039	0.486208	0.48039
136	0194	0.175016	0.288165	0.148505	0.154813	0.0999236	0.175016	0.288165	0.148505	0.154813	0.0999236	1322.87	1397.66	1322.09	1331.42	1318.98	1210.66	1318.98	1391.54	1165.46	1167.19	-5.49788	-0.703519	8.56372	-5.35383	-0.148031	5.49788	0.703519	8.56372	5.35383	0.148031	0.987211	0.981768	0.979481	0.987001	0.989459	0.990963	0.99423	0.995434	0.991164	0.998639	0.960063	0.978303	0.978586	0.96057	0.988717	1.0825	0.420565	0.352446
136	0196	-0.0823215	-0.07352	0.079275	0.0092635	0.0291034	0.0823215	0.07352	0.079275	0.0092635	0.0291034	1261.02	1258.11	1432.51	1424.46	1260.92	1293.48	1260.92	1257.05	1232.66	1235.63	0.230688	0.563565	-2.54918	0.307447	-0.240653	0.230688	0.563565	2.54918	0.307447	0.240653	0.981252	0.971045	0.981057	0.981288	0.990088	0.997964	0.99462	0.996289	0.998063	0.998512	0.982361	0.973755	0.981398	0.982772	0.988875	0.265821	0.534283	0.298467
136	0299	-0.454239	-0.613928	-0.354942	-0.326881	-0.310976	0.454239	0.613928	0.354942	0.326881	0.310976	1218.08	1207.45	1453.19	1441.31	1231.18	1269.77	1231.18	1207.65	1279.98	1279.3	0.876784	0.82094	-3.0861	1.92936	0.0533261	0.876784	0.82094	3.0861	1.92936	0.0533261	0.96094	0.970587	0.969546	0.96015	0.988009	0.996396	0.99472	0.995558	0.997506	0.998561	0.965146	0.974571	0.974227	0.96941	0.988272	0.576663	0.462109	0.409475
136	0300	0.146769	0.0867295	0.15028	0.133227	0.109375	0.146769	0.0867295	0.15028	0.133227	0.109375	1681.33	1688.44	1809.04	1824.81	1683.99	1727.6	1683.99	1688.94	1655.68	1655.68	-0.421716	-0.867876	-2.55656	-0.293493	0.000318506	0.421716	0.867876	2.55656	0.293493	0.000318506	0.985638	0.987216	0.987966	0.985186	0.990105	0.996807	0.993844	0.995546	0.996945	0.99833	0.983555	0.982926	0.985714	0.983737	0.990102	0.28151	0.409476	0.261489
136	0426	0.421252	0.390487	0.475764	0.447905	0.420986	0.421252	0.390487	0.475764	0.447905	0.420986	1832.11	1828.24	1961.98	1967.75	1835.32	1857.44	1835.32	1826.85	1776.9	1774.4	0.211609	-0.293669	-1.19785	0.462577	0.140712	0.211609	0.293669	1.19785	0.462577	0.140712	0.973032	0.982672	0.980804	0.971586	0.988558	0.995277	0.994174	0.994169	0.995468	0.998162	0.974061	0.981235	0.97952	0.973832	0.989257	0.498315	0.44708	0.452963
137	0283	0.303343	0.118912	0.121246	0.261545	0.230475	0.303343	0.118912	0.121246	0.261545	0.230475	1462.5	1484.33	1574.11	1582.75	1469.03	1498.3	1469.03	1482.27	1440.26	1440	-1.48187	-0.54718	-1.9733	-0.8972	0.0183089	1.48187	0.54718	1.9733	0.8972	0.0183089	0.979016	0.980741	0.981891	0.975343	0.989483	0.995218	0.993472	0.992295	0.995495	0.998648	0.971769	0.978069	0.975327	0.970977	0.989575	0.599236	0.434163	0.505736
137	0301	1.12209	1.25908	1.0499	1.27925	1.18447	1.12209	1.25908	1.0499	1.27925	1.18447	1293.11	1309.58	1420.72	1445.28	1289.59	1365.06	1289.59	1307.11	1311.44	1312.12	-1.26569	-1.71363	-5.68535	-1.34879	-0.0520999	1.26569	1.71363	5.68535	1.34879	0.0520999	0.983781	0.986647	0.98712	0.984313	0.989933	0.996641	0.993716	0.994363	0.996615	0.998751	0.977554	0.978188	0.979027	0.977673	0.98967	0.406451	0.466322	0.392725
137	0366	0.199191	0.0174138	0.071439	-0.02955	-0.0241429	0.199191	0.0174138	0.071439	0.02955	0.0241429	1092.1	1085.56	1183.79	1182.75	1092.93	1099.07	1092.93	1087.57	1103.08	1101.47	0.601334	0.0880638	-0.560096	0.491429	0.146203	0.601334	0.0880638	0.560096	0.491429	0.146203	0.978409	0.980851	0.985306	0.979911	0.991484	0.998499	0.995767	0.996762	0.998537	0.999314	0.981351	0.981283	0.985003	0.982319	0.992209	0.239691	0.268599	0.187153
137	0459	-0.114872	0.291437	0.180813	0.0925588	0.0853146	0.114872	0.291437	0.180813	0.0925588	0.0853146	1391.09	1399.26	1483.09	1502.16	1396.1	1443.2	1396.1	1405.81	1396.1	1399.52	-0.585939	-1.27732	-3.31793	-0.693362	-0.244316	0.585939	1.27732	3.31793	0.693362	0.244316	0.974979	0.981376	0.982446	0.978345	0.989369	0.996108	0.992995	0.995147	0.996382	0.998346	0.972115	0.975101	0.979927	0.974947	0.988157	0.504896	0.51876	0.380768
137	0686	0.41128	0.271676	0.299623	0.822921	0.945064	0.41128	0.271676	0.299623	0.822921	0.945064	1659.04	1540.4	1894.35	1748.03	1650.55	1580.16	1650.55	1534.04	1583.39	1567.78	7.41572	8.03394	4.35751	7.31724	0.990682	7.41572	8.03394	4.35751	7.31724	0.990682	0.91866	0.909406	0.922386	0.918137	0.983308	0.998907	0.997404	0.99907	0.998757	0.999259	0.952611	0.945887	0.956905	0.951611	0.988007	0.993139	1.35175	0.994582
010	0419	-0.10262	-0.464699	-0.363806	-0.170313	-0.241594	0.10262	0.464699	0.363806	0.170313	0.241594	1465.54	2705.41	1651	1635.06	1468.86	1511.65	1468.86	1469.08	1449.45	1447.12	-59.4525	0.970129	-2.87134	-0.0149339	0.160721	59.4525	0.970129	2.87134	0.0149339	0.160721	0.953476	0.968968	0.976498	0.980658	0.988588	0.872817	0.993644	0.995171	0.997208	0.998613	0.670042	0.973654	0.979151	0.98056	0.989356	19.0646	0.487122	0.312985
137	0796	-0.226035	-0.464098	-0.448689	-0.469363	-0.445826	0.226035	0.464098	0.448689	0.469363	0.445826	1660.3	1637.79	1853.48	1754.76	1665.29	1704	1665.29	1674.42	1646.86	1642.41	1.36473	5.47161	-2.29789	-0.546338	0.270624	1.36473	5.47161	2.29789	0.546338	0.270624	0.963834	0.930914	0.975118	0.976156	0.986882	0.99652	0.996202	0.996225	0.995473	0.998412	0.970418	0.956398	0.978857	0.973502	0.98822	0.568049	1.04606	0.411127
137	0972	0.396781	0.31478	0.19557	0.263929	0.29899	0.396781	0.31478	0.19557	0.263929	0.29899	1312.61	1326.2	1410.31	1429.39	1312.11	1320.38	1312.11	1318.75	1305.96	1306.78	-1.02966	-1.34353	-0.628381	-0.505443	-0.0621654	1.02966	1.34353	0.628381	0.505443	0.0621654	0.975043	0.982257	0.977488	0.976787	0.989479	0.995834	0.993487	0.994928	0.996664	0.99869	0.970014	0.97564	0.975536	0.97431	0.98916	0.593228	0.509662	0.42541
137	1041	-1.08442	-0.23789	-0.0559936	-0.418643	-0.364386	1.08442	0.23789	0.0559936	0.418643	0.364386	1480.63	1394.73	1680.03	1545.49	1470.9	1342.28	1470.9	1380.71	1432.01	1425.82	5.97445	8.34204	9.14377	6.32528	0.433086	5.97445	8.34204	9.14377	6.32528	0.433086	0.929002	0.914405	0.873064	0.928241	0.985791	0.998748	0.998707	0.998901	0.998964	0.999073	0.956714	0.95232	0.929408	0.957379	0.987854	0.832855	1.06144	1.79551
141	0696	-0.524274	-0.195508	-0.514954	-0.575753	-0.517865	0.524274	0.195508	0.514954	0.575753	0.517865	1227.37	1213.2	1378.97	1358.75	1225.17	1265.31	1225.17	1211.06	1177.71	1177.03	1.16177	1.47742	-3.22292	1.15907	0.0579681	1.16177	1.47742	3.22292	1.15907	0.0579681	0.969358	0.966562	0.967813	0.969623	0.986727	0.99762	0.994952	0.995407	0.997654	0.998495	0.975002	0.97372	0.974398	0.975254	0.987044	0.540301	0.570692	0.598916
141	0717	-1.41624	-0.935912	-1.10563	-1.20347	-1.10297	1.41624	0.935912	1.10563	1.20347	1.10297	1648.56	1641.62	1888.42	1882.99	1655.14	1744.15	1655.14	1633.81	1580.98	1588.91	0.421595	0.288254	-5.23669	1.29718	-0.50053	0.421595	0.288254	5.23669	1.29718	0.50053	0.97482	0.97205	0.969288	0.967115	0.990191	0.996322	0.993555	0.995314	0.996477	0.997523	0.976864	0.973443	0.974572	0.973377	0.987702	0.575968	0.72027	0.648567
141	0726	-0.295588	-0.4095	-0.231251	-0.218827	-0.203911	0.295588	0.4095	0.231251	0.218827	0.203911	1394.92	1383.97	1581.48	1578.18	1385.6	1438.57	1385.6	1380.78	1365.5	1366.21	0.788759	0.208883	-3.75111	0.348109	-0.052028	0.788759	0.208883	3.75111	0.348109	0.052028	0.96986	0.973063	0.975724	0.972713	0.989603	0.996781	0.993511	0.995209	0.996586	0.998459	0.973674	0.974068	0.977534	0.974396	0.989334	0.575283	0.628835	0.476758
141	0767	0.525842	0.643098	0.060342	-0.0436465	-0.103552	0.525842	0.643098	0.060342	0.0436465	0.103552	1230.6	1225.94	1452.06	1450.72	1226.98	1337.12	1226.98	1231.12	1219.1	1219.58	0.379191	0.09211	-8.59135	-0.337303	-0.0396731	0.379191	0.09211	8.59135	0.337303	0.0396731	0.969483	0.967147	0.975155	0.975541	0.989342	0.99665	0.991439	0.994685	0.996523	0.998627	0.971308	0.967579	0.97658	0.973882	0.989133	0.622401	0.841459	0.547523
141	0810	1.15424	0.536613	0.89485	0.890097	0.8324	1.15424	0.536613	0.89485	0.890097	0.8324	1462.65	1513.09	1668.3	1705.45	1446.02	1563.7	1446.02	1515.44	1463.87	1465.27	-3.39004	-2.20248	-7.82002	-4.68811	-0.0956338	3.39004	2.20248	7.82002	4.68811	0.0956338	0.982707	0.98129	0.980947	0.986678	0.988064	0.992114	0.990757	0.990106	0.99078	0.998038	0.966067	0.970495	0.966398	0.963565	0.987609	0.94774	0.979579	0.994284
141	0852	1.00203	0.55945	0.928659	0.786914	0.738985	1.00203	0.55945	0.928659	0.786914	0.738985	1225.49	1249.97	1425.73	1464.06	1231.71	1323.76	1231.71	1246.43	1217.04	1225.42	-1.97811	-2.65282	-7.20399	-1.18834	-0.685836	1.97811	2.65282	7.20399	1.18834	0.685836	0.983643	0.980598	0.978189	0.98079	0.99049	0.995477	0.991284	0.994045	0.996099	0.997982	0.973936	0.967615	0.971771	0.974982	0.987127	0.650108	0.942963	0.707617
141	0853	-0.241533	-0.870218	-0.520603	-0.388714	-0.42437	0.241533	0.870218	0.520603	0.388714	0.42437	1432.58	1423.63	1596.26	1589.22	1431.7	1430.86	1431.7	1426.36	1341.3	1340.93	0.626924	0.442162	0.0589381	0.373812	0.0274025	0.626924	0.442162	0.0589381	0.373812	0.0274025	0.969748	0.968337	0.965549	0.972997	0.988217	0.996427	0.993755	0.995362	0.996536	0.99841	0.972786	0.970459	0.971195	0.974804	0.988348	0.647636	0.753	0.73857
010	0472	0.0310525	0.421413	0.0328451	0.0521175	0.115234	0.0310525	0.421413	0.0328451	0.0521175	0.115234	1353.65	1351.5	1519.11	1524.78	1339.27	1393.46	1339.27	1351.74	1324.29	1324.7	0.158916	-0.37269	-3.96584	-0.927151	-0.0308166	0.158916	0.37269	3.96584	0.927151	0.0308166	0.97711	0.981981	0.981174	0.987608	0.990512	0.997227	0.993848	0.995645	0.997208	0.998756	0.977887	0.980152	0.982	0.98303	0.99036	0.384708	0.425915	0.310858
141	1024	-0.098851	-0.069054	-0.390719	-0.3399	-0.294668	0.098851	0.069054	0.390719	0.3399	0.294668	1549.22	1513.75	1761.01	1745.84	1559.99	1601.74	1559.99	1515.28	1522.06	1517.41	2.31601	0.864986	-2.64135	2.90768	0.305481	2.31601	0.864986	2.64135	2.90768	0.305481	0.960002	0.968771	0.972271	0.954104	0.986336	0.997212	0.994167	0.994678	0.997168	0.998304	0.971113	0.972965	0.97454	0.967969	0.987836	0.542478	0.677287	0.595082
141	1094	-0.69387	-0.236757	0.078367	-0.553994	-0.583553	0.69387	0.236757	0.078367	0.553994	0.583553	1613.49	1597.02	1797.48	1759.71	1609.06	1630.19	1609.06	1601.23	1546.74	1544.58	1.02589	2.12359	-1.30447	0.487923	0.139382	1.02589	2.12359	1.30447	0.487923	0.139382	0.972458	0.964569	0.952554	0.974358	0.98799	0.997033	0.99676	0.997016	0.996455	0.99827	0.977428	0.974789	0.968559	0.976714	0.988667	0.499073	0.630421	0.934934
141	1137	-1.37637	-1.73656	-1.91291	-2.49303	-2.12166	1.37637	1.73656	1.91291	2.49303	2.12166	1310.73	1226.93	1461.6	1424.08	1296.85	1265.39	1296.85	1235.31	1225.95	1221.35	6.60433	2.60033	2.45506	4.86003	0.37572	6.60433	2.60033	2.45506	4.86003	0.37572	0.923685	0.956795	0.934617	0.935453	0.984303	0.998334	0.996141	0.997569	0.997732	0.998514	0.954184	0.969255	0.960109	0.958197	0.986168	0.922601	0.625065	0.841696
141	1152	-0.880356	-0.226856	0.314696	-0.696887	-0.750081	0.880356	0.226856	0.314696	0.696887	0.750081	1256.91	1247.16	1376.2	1360.39	1278.61	1246.52	1278.61	1265.33	1171.69	1169.36	0.778733	1.15559	2.54181	1.04425	0.19911	0.778733	1.15559	2.54181	1.04425	0.19911	0.967075	0.968138	0.970016	0.96542	0.986283	0.996778	0.995949	0.996788	0.996843	0.998615	0.97086	0.973751	0.975925	0.97048	0.987287	0.697074	0.570282	0.504125
941	1197	0.0432136	-0.5999	-0.439567	-0.177508	-0.130881	0.0432136	0.5999	0.439567	0.177508	0.130881	1249.8	1252.07	1448.24	1442.34	1253.48	1320.6	1253.48	1246.8	1238.54	1236.61	-0.181214	0.408396	-5.21509	0.534689	0.156354	0.181214	0.408396	5.21509	0.534689	0.156354	0.97658	0.972937	0.972605	0.973051	0.987073	0.996782	0.995335	0.994969	0.997234	0.998564	0.975684	0.974906	0.972441	0.975643	0.987836	0.539506	0.583742	0.606556
941	1202	0.786153	0.378873	0.765213	0.739487	0.703896	0.786153	0.378873	0.765213	0.739487	0.703896	1547.31	1555.75	1715.06	1744.25	1549.49	1600.57	1549.49	1561.42	1474.62	1474.1	-0.543818	-1.68762	-3.2431	-0.766779	0.035863	0.543818	1.68762	3.2431	0.766779	0.035863	0.971742	0.980761	0.982719	0.97013	0.987795	0.994516	0.991849	0.991819	0.993879	0.998177	0.969101	0.972487	0.971347	0.966411	0.987971	0.804882	0.841637	0.837993
010	0786	-0.13021	-0.590873	-0.126847	-0.201869	-0.0772711	0.13021	0.590873	0.126847	0.201869	0.0772711	1512.14	1441.98	1883.61	1923.44	1499.94	1444.09	1499.94	1483.94	1408.64	1406.6	4.74982	-2.09245	3.79424	1.0729	0.144309	4.74982	2.09245	3.79424	1.0729	0.144309	0.92603	0.978183	0.97421	0.959825	0.98864	0.995926	0.984249	0.993107	0.995682	0.998648	0.948018	0.967947	0.973791	0.96497	0.98935	1.0681	0.779153	0.521069
010	0829	0.063396	0.0538614	-0.058117	0.0473755	-0.011056	0.063396	0.0538614	0.058117	0.0473755	0.011056	1655.08	1146.18	1259.89	1276.14	1136.46	1180.39	1136.46	1145.37	1099.9	1103.73	36.3337	-1.28175	-3.7926	-0.781414	-0.347474	36.3337	1.28175	3.7926	0.781414	0.347474	0.663788	0.983957	0.987479	0.98609	0.990756	0.995287	0.992198	0.993261	0.997669	0.998684	0.784371	0.977642	0.980058	0.982228	0.989025	1.79056	0.498338	0.407726
011	0003	0.21925	0.132848	0.0353403	0.134705	0.193439	0.21925	0.132848	0.0353403	0.134705	0.193439	1667.57	1669.62	2020.82	2012.66	1668.04	1850.74	1668.04	1661.43	1623.55	1621.62	-0.122708	0.4048	-10.3845	0.396798	0.118907	0.122708	0.4048	10.3845	0.396798	0.118907	0.975803	0.974689	0.981062	0.976424	0.988609	0.995488	0.993386	0.989794	0.996518	0.998246	0.97521	0.976666	0.971973	0.978366	0.989201	0.640528	0.728546	0.862071
011	0005	0.0170032	-0.322128	0.0993957	0.162928	0.128437	0.0170032	0.322128	0.0993957	0.162928	0.128437	1509.92	1520.19	1816.55	1826.03	1513.72	1653.26	1513.72	1514.1	1501.14	1501.65	-0.67782	-0.520511	-8.81232	-0.0253895	-0.0342181	0.67782	0.520511	8.81232	0.0253895	0.0342181	0.983473	0.979161	0.980465	0.982049	0.990523	0.996311	0.992017	0.993913	0.997113	0.998458	0.98014	0.976613	0.979005	0.981925	0.990354	0.53828	0.714443	0.606577
011	0010	-0.930277	-1.33207	-0.941882	-0.89561	-0.960534	0.930277	1.33207	0.941882	0.89561	0.960534	1412.09	1381.49	1615.29	1590.27	1410.79	1484.85	1410.79	1388.13	1342.09	1338.12	2.19114	1.5608	-5.11538	1.61862	0.296339	2.19114	1.5608	5.11538	1.61862	0.296339	0.96809	0.970074	0.963916	0.971366	0.986082	0.998495	0.997208	0.997392	0.998153	0.99848	0.978673	0.977632	0.974409	0.979202	0.987522	0.372109	0.498933	0.496337
011	0016	-0.171095	-0.939168	-0.0526932	-0.185879	-0.102743	0.171095	0.939168	0.0526932	0.185879	0.102743	1297.04	1297.13	1640.28	1656.67	1295.81	1437.97	1295.81	1296.16	1250.78	1252.22	-0.00679408	-0.994101	-10.4002	-0.027344	-0.115511	0.00679408	0.994101	10.4002	0.027344	0.115511	0.977327	0.978305	0.980249	0.977631	0.989157	0.996979	0.988113	0.986869	0.996995	0.998472	0.977296	0.973765	0.969395	0.977498	0.988594	0.55791	0.785694	0.997228
011	0021	0.0226471	-0.150296	-0.0954495	-0.174216	-0.155424	0.0226471	0.150296	0.0954495	0.174216	0.155424	1306.9	1307.45	1658.16	1658.46	1311.25	1459.39	1311.25	1304.64	1285.86	1285.19	-0.042171	-0.0182038	-10.6937	0.505326	0.0522161	0.042171	0.0182038	10.6937	0.505326	0.0522161	0.981888	0.97486	0.97082	0.978356	0.989233	0.997505	0.991826	0.993308	0.997756	0.998642	0.981641	0.97475	0.973168	0.980788	0.989452	0.471951	0.737716	0.706718
002	0619	-0.693023	0.209018	-0.004083	-0.270499	-0.233419	0.693023	0.209018	0.004083	0.270499	0.233419	1765.77	1813.47	2228.02	2175.86	1779.13	1750.28	1779.13	1674.07	1712.39	1715.2	-2.66534	2.36879	1.63485	6.08498	-0.164217	2.66534	2.36879	1.63485	6.08498	0.164217	0.970617	0.948551	0.87586	0.919861	0.988062	0.991481	0.992561	0.999049	0.996734	0.997979	0.957659	0.959794	0.931772	0.947667	0.987109	1.06926	0.947725	2.39514
011	0022	0.26917	0.130246	0.252364	0.382974	0.297809	0.26917	0.130246	0.252364	0.382974	0.297809	1183.24	1217.68	1431.45	1451.08	1182.99	1247.88	1182.99	1212.68	1116.14	1113.93	-2.86906	-1.36143	-5.33887	-2.47806	0.198256	2.86906	1.36143	5.33887	2.47806	0.198256	0.985231	0.974539	0.975559	0.985612	0.985758	0.99473	0.988841	0.99448	0.995258	0.998609	0.971044	0.967882	0.976253	0.973349	0.986669	0.947653	0.984726	0.588107
011	0023	-0.0829094	-0.180785	-0.13562	-0.00118282	-0.0322747	0.0829094	0.180785	0.13562	0.00118282	0.0322747	1433.77	1430.9	1737.75	1715.55	1432.07	1529.73	1432.07	1427.65	1379.53	1379.94	0.200415	1.28562	-6.59472	0.309209	-0.0297612	0.200415	1.28562	6.59472	0.309209	0.0297612	0.981042	0.966063	0.973785	0.980693	0.988228	0.997473	0.991169	0.993678	0.997586	0.998279	0.98202	0.972269	0.977863	0.982204	0.988077	0.458905	0.794909	0.578634
011	0053	0.153339	-0.164872	-0.502005	-0.177838	-0.258138	0.153339	0.164872	0.502005	0.177838	0.258138	1507.25	1492.39	1801.2	1776.12	1511.56	1642.43	1511.56	1492.85	1487.52	1482.39	0.990868	1.40217	-8.29877	1.24554	0.345464	0.990868	1.40217	8.29877	1.24554	0.345464	0.973226	0.970399	0.962286	0.971797	0.986794	0.997329	0.996061	0.996378	0.997493	0.998482	0.978041	0.977196	0.972978	0.977843	0.988493	0.508585	0.622994	0.787733
011	0183	-0.16704	-0.231582	-0.3789	-0.238741	-0.245835	0.16704	0.231582	0.3789	0.238741	0.245835	1405.74	1411.99	1681.14	1680.41	1407.67	1537.94	1407.67	1408.9	1370.03	1374.3	-0.443442	0.0436853	-8.84527	-0.0870741	-0.311049	0.443442	0.0436853	8.84527	0.0870741	0.311049	0.989806	0.988732	0.98305	0.987213	0.991929	0.997868	0.996942	0.995579	0.998008	0.998418	0.987611	0.988948	0.982758	0.986783	0.990387	0.346172	0.352618	0.460038
012	0637	-0.0612245	0.0662725	-0.039304	0.0413685	0.098817	0.0612245	0.0662725	0.039304	0.0413685	0.098817	1279.1	1279.37	1440.17	1439.75	1279.82	1333.85	1279.82	1279.44	1279.6	1280.51	-0.0211063	0.0287849	-4.13431	0.0296717	-0.0710237	0.0211063	0.0287849	4.13431	0.0296717	0.0710237	0.984634	0.981514	0.984082	0.985247	0.990785	0.998097	0.996037	0.996949	0.998233	0.998787	0.984531	0.981656	0.984355	0.985393	0.990433	0.206887	0.347825	0.229551
012	0689	0.834451	1.26064	1.46821	0.743158	0.724329	0.834451	1.26064	1.46821	0.743158	0.724329	1558.08	1593.34	1738.96	1763.97	1561.71	1624.72	1561.71	1595.81	1542.8	1548.81	-2.23793	-1.42825	-3.95455	-2.15953	-0.38921	2.23793	1.42825	3.95455	2.15953	0.38921	0.982223	0.980884	0.982646	0.981394	0.990392	0.994102	0.991952	0.99263	0.994083	0.998046	0.97121	0.973862	0.974501	0.970777	0.988443	0.747574	0.679287	0.650348
012	0803	0.899133	0.355783	0.183448	0.265835	0.248177	0.899133	0.355783	0.183448	0.265835	0.248177	2988.21	1212.22	1439.67	1438.9	1216.64	1287.74	1216.64	1216.1	1241.66	1240.22	84.5623	0.0537132	-5.67792	0.0450013	0.116608	84.5623	0.0537132	5.67792	0.0450013	0.116608	0.39319	0.971573	0.977026	0.97313	0.988857	0.995746	0.993169	0.994197	0.996948	0.99882	0.559437	0.97184	0.974916	0.973349	0.98943	8.38296	0.610602	0.510567
012	1009	-0.0406645	-0.26989	-0.178809	-0.154828	-0.112999	0.0406645	0.26989	0.178809	0.154828	0.112999	1399.23	1406.16	1590.12	1588.6	1400.54	1477.05	1400.54	1418.5	1410.45	1409.96	-0.493922	0.0960883	-5.31786	-1.27421	0.034852	0.493922	0.0960883	5.31786	1.27421	0.034852	0.985781	0.983289	0.98208	0.985385	0.991532	0.997409	0.996468	0.997032	0.996287	0.998892	0.983347	0.983761	0.983803	0.979107	0.991704	0.286268	0.275518	0.221851
012	1133	-0.503301	-0.306636	0.261977	-0.238283	-0.156755	0.503301	0.306636	0.261977	0.238283	0.156755	1197.93	1194.99	1367.78	1358.68	1195.86	1275.55	1195.86	1188.47	1230.15	1229.46	0.245676	0.666979	-6.44854	0.619718	0.0560875	0.245676	0.666979	6.44854	0.619718	0.0560875	0.972343	0.975421	0.97479	0.971294	0.98921	0.99714	0.995896	0.996411	0.997448	0.998804	0.973542	0.978667	0.97885	0.974307	0.989487	0.421908	0.379948	0.312233
013	0502	-0.639473	-0.19724	-0.629034	-0.342713	-0.32947	0.639473	0.19724	0.629034	0.342713	0.32947	1496.08	1480.36	1653.74	1642.71	1494.79	1546.22	1494.79	1475.18	1460.11	1457.92	1.05655	0.66913	-3.38236	1.32046	0.149845	1.05655	0.66913	3.38236	1.32046	0.149845	0.973911	0.973251	0.973692	0.973095	0.987066	0.997563	0.995544	0.996393	0.997845	0.99826	0.979056	0.976508	0.978025	0.97952	0.987806	0.486649	0.5206	0.458304
002	0685	-0.337599	-0.10009	-0.0704606	-0.012911	-0.06821	0.337599	0.10009	0.0704606	0.012911	0.06821	1354.8	1346.56	1527.23	1521.97	1353.16	1388.24	1353.16	1348.97	1321.31	1321.5	0.610163	0.34506	-2.55897	0.310223	-0.0139677	0.610163	0.34506	2.55897	0.310223	0.0139677	0.981091	0.979522	0.980563	0.981816	0.990864	0.998283	0.994886	0.995945	0.997983	0.998793	0.984083	0.981211	0.982654	0.983338	0.990794	0.19687	0.342681	0.299641
013	0575	0.907759	0.758605	1.02672	0.910628	0.96912	0.907759	0.758605	1.02672	0.910628	0.96912	1333.71	1359.76	1492.22	1491.52	1328.23	1369.02	1328.23	1383.4	1217.87	1220.11	-1.93454	0.0467533	-3.02407	-4.06899	-0.18381	1.93454	0.0467533	3.02407	4.06899	0.18381	0.975936	0.971591	0.96532	0.979695	0.984601	0.994021	0.99347	0.993797	0.99156	0.997867	0.966495	0.971804	0.967912	0.959766	0.983696	0.879629	0.895278	1.30408
013	1035	0.22761	0.260106	0.437475	0.250777	0.199545	0.22761	0.260106	0.437475	0.250777	0.199545	1447.3	1424.73	1563.82	1585.05	1386.67	1430.64	1386.67	1447.68	1410.09	1412.94	1.57141	-1.34834	-3.12137	-4.30469	-0.201379	1.57141	1.34834	3.12137	4.30469	0.201379	0.957173	0.979964	0.943334	0.967905	0.989527	0.995899	0.991935	0.996476	0.989092	0.998175	0.964693	0.973357	0.963127	0.947072	0.988531	0.720316	0.726172	0.950572
013	1205	-0.072355	0.183626	0.084205	0.0144145	-0.015661	0.072355	0.183626	0.084205	0.0144145	0.015661	1299.37	1250.71	1478.73	1483.85	1288.64	1364.34	1288.64	1248.91	1254.06	1249.98	3.81694	-0.345687	-5.70732	3.13147	0.325724	3.81694	0.345687	5.70732	3.13147	0.325724	0.93696	0.972591	0.974235	0.937563	0.985403	0.996593	0.991961	0.992352	0.995834	0.99855	0.954839	0.970911	0.970844	0.952252	0.987011	0.842495	0.752104	0.717588
014	0328	-0.966235	-0.190734	-0.256019	-0.318113	-0.31127	0.966235	0.190734	0.256019	0.318113	0.31127	1406.87	1369.7	1565.13	1560.94	1401.07	1422.79	1401.07	1375.11	1386	1383.13	2.67751	0.268491	-1.53848	1.87051	0.207347	2.67751	0.268491	1.53848	1.87051	0.207347	0.96342	0.975731	0.979705	0.96976	0.988912	0.998577	0.993407	0.992072	0.998368	0.998758	0.976306	0.97703	0.975105	0.978818	0.989926	0.292723	0.468855	0.494307
014	0519	-0.0953949	-0.00132515	-0.0205102	-0.0588583	-0.0355393	0.0953949	0.00132515	0.0205102	0.0588583	0.0355393	1450.35	1454.07	1615.96	1615.52	1457.37	1492.88	1457.37	1453.07	1407.66	1407.75	-0.256662	0.0268936	-2.40735	0.295268	-0.00651824	0.256662	0.0268936	2.40735	0.295268	0.00651824	0.982481	0.979226	0.97441	0.979836	0.989916	0.997093	0.994052	0.994793	0.997494	0.998581	0.981218	0.979355	0.97728	0.98128	0.989884	0.312315	0.409702	0.469403
014	0520	0.881525	0.651115	0.816894	0.760755	0.754996	0.881525	0.651115	0.816894	0.760755	0.754996	1443.54	1444.79	1627.63	1640.92	1441.63	1509.1	1441.63	1446.51	1427.62	1429.95	-0.0866147	-0.813404	-4.57292	-0.338082	-0.16321	0.0866147	0.813404	4.57292	0.338082	0.16321	0.979689	0.981173	0.981721	0.981203	0.989125	0.996955	0.993568	0.994303	0.996816	0.998225	0.979274	0.977192	0.977714	0.979556	0.988328	0.36187	0.524154	0.469965
014	0548	0.246226	0.0851911	0.184289	0.22625	0.234098	0.246226	0.0851911	0.184289	0.22625	0.234098	1433.46	1425.16	1612.17	1616.81	1433.92	1470.19	1433.92	1430.06	1407.63	1407.13	0.5808	-0.287567	-2.49803	0.269345	0.0356714	0.5808	0.287567	2.49803	0.269345	0.0356714	0.97484	0.978392	0.979173	0.976136	0.988263	0.997241	0.994503	0.995086	0.996982	0.998416	0.977691	0.976995	0.977343	0.977472	0.988464	0.349759	0.504284	0.458886
014	0558	0.773161	0.725274	0.899554	0.78604	0.821036	0.773161	0.725274	0.899554	0.78604	0.821036	1548.98	1561.67	1667.23	1673.95	1549.91	1543.07	1549.91	1556.28	1467.18	1470.12	-0.816247	-0.402218	0.442428	-0.409694	-0.20036	0.816247	0.402218	0.442428	0.409694	0.20036	0.977224	0.97927	0.980559	0.976127	0.990665	0.995166	0.993235	0.993444	0.995629	0.998336	0.973234	0.977295	0.977012	0.974123	0.989667	0.533377	0.512041	0.456579
014	1095	0.366084	0.229229	0.119678	0.229135	0.156753	0.366084	0.229229	0.119678	0.229135	0.156753	1392.89	1381.24	1634.44	1625.9	1390.47	1497.33	1390.47	1396.28	1423.16	1423.66	0.840289	0.524118	-7.40109	-0.41722	-0.0346769	0.840289	0.524118	7.40109	0.41722	0.0346769	0.964326	0.971584	0.985206	0.971129	0.98977	0.99623	0.993196	0.988185	0.995444	0.998504	0.968387	0.974115	0.969631	0.969109	0.989603	0.602223	0.562207	0.742602
016	0359	0.258348	-0.509444	0.264421	0.185733	0.193806	0.258348	0.509444	0.264421	0.185733	0.193806	1120.08	1121.41	1270.28	1278.93	1145.22	1162.39	1145.22	1120.98	1075.72	1076.12	-0.119284	-0.6783	-1.48813	2.13894	-0.0371194	0.119284	0.6783	1.48813	2.13894	0.0371194	0.980208	0.975989	0.97629	0.957554	0.98871	0.997632	0.993811	0.995571	0.997538	0.99874	0.979609	0.972664	0.975875	0.967781	0.988511	0.414228	0.705066	0.529283
002	0816	0.129875	0.969191	-0.107678	-0.0428644	-0.0447171	0.129875	0.969191	0.107678	0.0428644	0.0447171	1376.71	1375.37	1620.94	1620.75	1371.81	1446.2	1371.81	1378.35	1351.15	1353.17	0.0976476	0.0113222	-5.27932	-0.475463	-0.149683	0.0976476	0.0113222	5.27932	0.475463	0.149683	0.977633	0.97635	0.982332	0.980446	0.989197	0.997082	0.993356	0.994907	0.996695	0.998357	0.978104	0.976402	0.980735	0.978107	0.988452	0.361373	0.561858	0.358733
016	0538	-0.40793	0.00946	0.159726	0.0553515	0.0795539	0.40793	0.00946	0.159726	0.0553515	0.0795539	1778.51	1533.38	1805.3	1715.8	1767.77	1566.09	1767.77	1525.39	1470	1464.48	14.8035	5.08349	12.0984	14.7201	0.376305	14.8035	5.08349	12.0984	14.7201	0.376305	0.85185	0.935023	0.949095	0.85453	0.985762	0.998027	0.996701	0.995811	0.998418	0.998384	0.914911	0.958809	0.962843	0.917447	0.987587	1.54367	1.17004	1.00962
016	0991	0.391392	0.267319	0.00038045	0.0878879	0.108996	0.391392	0.267319	0.00038045	0.0878879	0.108996	1116.66	1116.59	1377.36	1391.84	1258.6	1290.9	1258.6	1115.82	1161.04	1162.84	0.00638082	-1.04624	-2.53375	12.0263	-0.155397	0.00638082	1.04624	2.53375	12.0263	0.155397	0.97002	0.977216	0.976428	0.873246	0.99005	0.996639	0.993988	0.996449	0.998289	0.99865	0.970045	0.972106	0.977606	0.925749	0.98928	0.583006	0.75542	0.550057
018	0286	-0.130883	0.0920923	-0.152993	-0.0899625	-0.0792512	0.130883	0.0920923	0.152993	0.0899625	0.0792512	1508.59	1489.61	1753.79	1745.79	1509.67	1605.78	1509.67	1500.69	1543.83	1541.05	1.26568	0.457185	-6.17007	0.596579	0.180381	1.26568	0.457185	6.17007	0.596579	0.180381	0.973435	0.978065	0.976983	0.976928	0.989829	0.99793	0.995397	0.996205	0.997465	0.998724	0.979562	0.980278	0.980475	0.979807	0.990689	0.339711	0.360036	0.3422
018	0335	-0.516031	-0.123953	-0.17533	-0.260858	-0.177809	0.516031	0.123953	0.17533	0.260858	0.177809	1308.1	1313.57	1548.8	1550.3	1310.08	1449.85	1310.08	1310.64	1363.41	1361.53	-0.417653	-0.0966149	-10.1288	-0.0428895	0.137987	0.417653	0.0966149	10.1288	0.0428895	0.137987	0.973173	0.975853	0.972324	0.971966	0.988161	0.996112	0.994356	0.99552	0.996424	0.998623	0.97113	0.975399	0.975381	0.97174	0.988829	0.558662	0.50041	0.480447
018	0369	0.128519	0.287282	0.265821	0.038955	0.01963	0.128519	0.287282	0.265821	0.038955	0.01963	1395.55	1396.47	1616.18	1628.04	1392.78	1497.67	1392.78	1401.05	1418.49	1420.55	-0.0653511	-0.731145	-7.2573	-0.592157	-0.144883	0.0653511	0.731145	7.2573	0.592157	0.144883	0.977909	0.982559	0.983456	0.983558	0.990484	0.996934	0.995234	0.996071	0.99699	0.998494	0.977588	0.978966	0.980528	0.980644	0.989766	0.394334	0.507869	0.372011
018	0425	0.0419024	-0.0346703	0.296638	0.11414	0.110346	0.0419024	0.0346703	0.296638	0.11414	0.110346	1431.13	1440.79	1866.1	1857.16	1430.55	1532.81	1430.55	1443.61	1464.01	1465.4	-0.672348	0.479805	-6.90194	-0.909099	-0.0946892	0.672348	0.479805	6.90194	0.909099	0.0946892	0.979161	0.970504	0.976862	0.977619	0.991482	0.996175	0.994638	0.995888	0.995632	0.998653	0.975871	0.972832	0.976448	0.973177	0.991014	0.444225	0.589244	0.443035
020	0097	-0.03881	0.109257	0.155696	0.14225	0.140693	0.03881	0.109257	0.155696	0.14225	0.140693	1510.61	1511.81	1765.1	1771.25	1498.65	1644.79	1498.65	1505.84	1505.11	1504.45	-0.0794064	-0.347817	-9.29822	-0.47816	0.0437356	0.0794064	0.347817	9.29822	0.47816	0.0437356	0.980008	0.983922	0.980481	0.977291	0.991008	0.996711	0.992823	0.992338	0.995689	0.998652	0.979619	0.98221	0.978738	0.974954	0.991225	0.509988	0.558643	0.602419
020	0213	0.192692	0.003974	0.0961954	-0.0866932	-0.0734008	0.192692	0.003974	0.0961954	0.0866932	0.0734008	1425.64	1424.15	1726.31	1727.34	1427.31	1543.37	1427.31	1417.22	1398.74	1398.47	0.10435	-0.059611	-7.81373	0.709388	0.0197071	0.10435	0.059611	7.81373	0.709388	0.0197071	0.973325	0.973927	0.973038	0.969484	0.987574	0.996213	0.994956	0.995244	0.996534	0.998236	0.973855	0.973673	0.972206	0.972949	0.987693	0.57796	0.737429	0.698156
020	0899	-0.391136	0.181974	0.016483	0.130156	0.218775	0.391136	0.181974	0.016483	0.130156	0.218775	1262.18	1270.58	1495.9	1483.27	1265.72	1333.42	1265.72	1272.59	1205.06	1206.39	-0.663307	0.848139	-5.20963	-0.541159	-0.109944	0.663307	0.848139	5.20963	0.541159	0.109944	0.977272	0.965048	0.977802	0.976474	0.989387	0.996214	0.993506	0.994528	0.996258	0.998568	0.97403	0.969141	0.976027	0.973832	0.988843	0.614776	0.8417	0.593035
020	1288	-0.0955823	-0.41783	0.110086	-0.160662	-0.152239	0.0955823	0.41783	0.110086	0.160662	0.152239	1540.57	1546.99	1868.36	1890.03	1540.12	1683.44	1540.12	1550.23	1520.25	1523.81	-0.415863	-1.15292	-8.89188	-0.654294	-0.233323	0.415863	1.15292	8.89188	0.654294	0.233323	0.985148	0.980127	0.978456	0.986405	0.989854	0.996923	0.992428	0.994572	0.996739	0.998011	0.983102	0.974478	0.976396	0.983181	0.988699	0.46846	0.805771	0.640082
002	0938	-1.42389	-0.091522	-0.184519	-0.0115911	0.0432719	1.42389	0.091522	0.184519	0.0115911	0.0432719	1305.2	1196.54	1456.22	1429.76	1313.92	1263.94	1313.92	1200.9	1237.92	1225.64	8.68659	1.83376	3.87753	8.98861	0.996567	8.68659	1.83376	3.87753	8.98861	0.996567	0.908847	0.962852	0.95865	0.906758	0.980226	0.998984	0.994991	0.995481	0.999064	0.998805	0.948313	0.971674	0.969048	0.947504	0.985098	0.823276	0.556069	0.54424
021	0159	0.160222	-0.139764	0.775658	-0.17263	-0.0921871	0.160222	0.139764	0.775658	0.17263	0.0921871	1224.53	1225.68	1458.27	1450.55	1227.26	1259.93	1227.26	1222.1	1184.89	1185.55	-0.0939234	0.53082	-2.62706	0.42078	-0.0558836	0.0939234	0.53082	2.62706	0.42078	0.0558836	0.978164	0.971929	0.975926	0.97192	0.990048	0.997511	0.995475	0.996111	0.997384	0.998891	0.977692	0.974496	0.976317	0.973953	0.989758	0.337586	0.512762	0.400293
021	0337	0.051971	-0.216744	-0.0597642	-0.112741	-0.0363484	0.051971	0.216744	0.0597642	0.112741	0.0363484	1515.84	1528.74	1657.48	1665.85	1518.2	1601.22	1518.2	1527.55	1549.18	1549.69	-0.8474	-0.503774	-5.32272	-0.614372	-0.0324009	0.8474	0.503774	5.32272	0.614372	0.0324009	0.978086	0.979187	0.981134	0.976381	0.989836	0.995778	0.995293	0.995168	0.99586	0.998508	0.973938	0.976719	0.976698	0.973377	0.989673	0.482509	0.500046	0.489896
021	0343	-0.0955809	-0.641595	-0.58153	-0.0987899	-0.018555	0.0955809	0.641595	0.58153	0.0987899	0.018555	1403	1393.94	1597.57	1596.19	1417.77	1529.65	1417.77	1394.25	1515.37	1514.38	0.64806	0.086059	-7.59197	1.67301	0.0652357	0.64806	0.086059	7.59197	1.67301	0.0652357	0.960229	0.973931	0.978651	0.958758	0.98898	0.995765	0.993525	0.994423	0.996829	0.998563	0.963338	0.974348	0.977858	0.966774	0.989305	0.638556	0.465403	0.417371
021	0642	0.561804	0.719697	0.34589	0.232362	0.205128	0.561804	0.719697	0.34589	0.232362	0.205128	1383.91	1378.72	1460.02	1466.83	1384.15	1416.34	1384.15	1386.29	1396.27	1396.81	0.37566	-0.464922	-2.29901	-0.154562	-0.0384403	0.37566	0.464922	2.29901	0.154562	0.0384403	0.975215	0.97753	0.983157	0.980163	0.989202	0.997369	0.99435	0.996203	0.997326	0.998589	0.977053	0.975268	0.982125	0.979415	0.989021	0.382469	0.49575	0.320796
021	0647	0.425895	0.0676154	-0.401157	0.0968659	0.109663	0.425895	0.0676154	0.401157	0.0968659	0.109663	1388.91	1391.71	1523.38	1527.88	1389.9	1448.46	1389.9	1394.61	1373.87	1374.65	-0.201636	-0.295536	-4.12597	-0.33824	-0.0569456	0.201636	0.295536	4.12597	0.33824	0.0569456	0.980029	0.978421	0.985611	0.979387	0.989053	0.997233	0.994762	0.990765	0.996978	0.998567	0.979026	0.976963	0.969383	0.977716	0.988758	0.331224	0.446701	0.668965
021	0753	-0.109546	0.00643565	-0.0417059	0.233511	0.185052	0.109546	0.00643565	0.0417059	0.233511	0.185052	1447.01	1456.82	1606.68	1599.65	1447.09	1534.09	1447.09	1456.35	1463.23	1464.79	-0.675272	0.438475	-5.83611	-0.637221	-0.106621	0.675272	0.438475	5.83611	0.637221	0.106621	0.976667	0.974123	0.981552	0.976206	0.989858	0.996036	0.995929	0.995053	0.996027	0.998503	0.973366	0.976256	0.976928	0.973096	0.989319	0.554144	0.530401	0.480452
021	0984	0.143636	-0.0440181	-0.0829006	-0.0778231	-0.118212	0.143636	0.0440181	0.0829006	0.0778231	0.118212	1585.02	1595.56	1750.34	1763.23	1592.07	1628.97	1592.07	1594.56	1578.46	1579.36	-0.662409	-0.73363	-2.29123	-0.156219	-0.056712	0.662409	0.73363	2.29123	0.156219	0.056712	0.979812	0.982203	0.983734	0.978046	0.989361	0.996087	0.994029	0.994111	0.996554	0.998376	0.976584	0.978615	0.978269	0.977299	0.989096	0.468252	0.476398	0.485062
021	1109	0.047908	-0.09819	-0.112145	-0.0992071	-0.170846	0.047908	0.09819	0.112145	0.0992071	0.170846	1125.28	1123.95	1226.11	1224.76	1116.19	1153.45	1116.19	1119	1133.04	1132.98	0.118353	0.109993	-3.28329	-0.251499	0.0051198	0.118353	0.109993	3.28329	0.251499	0.0051198	0.97567	0.977609	0.979023	0.978324	0.990214	0.997696	0.996135	0.996824	0.997613	0.999022	0.976234	0.978133	0.980104	0.977081	0.990227	0.319028	0.351768	0.268015
022	0014	0.495824	0.155443	0.184224	0.256692	0.272993	0.495824	0.155443	0.184224	0.256692	0.272993	1186.15	1178.41	1325.41	1323.07	1184.6	1231.87	1184.6	1182.07	1123.89	1125.28	0.65451	0.176563	-3.91193	0.213908	-0.123212	0.65451	0.176563	3.91193	0.213908	0.123212	0.974281	0.975425	0.978805	0.977475	0.989773	0.997692	0.994792	0.994302	0.997552	0.998701	0.977462	0.976273	0.975719	0.978511	0.989154	0.476513	0.583133	0.62402
022	0066	0.25163	0.362538	0.503312	0.342274	0.221696	0.25163	0.362538	0.503312	0.342274	0.221696	1191.46	1201.48	1285.7	1295.01	1184.61	1193.44	1184.61	1178.29	1104.12	1105.02	-0.837149	-0.721894	-0.74263	0.534989	-0.0821588	0.837149	0.721894	0.74263	0.534989	0.0821588	0.971442	0.978132	0.980164	0.971179	0.98985	0.995533	0.993881	0.995363	0.997179	0.998781	0.96736	0.974588	0.977994	0.97376	0.989433	0.827696	0.692388	0.524412
002	1018	0.0701255	0.0778564	0.0733673	0.113787	0.0877553	0.0701255	0.0778564	0.0733673	0.113787	0.0877553	1312.54	1313.3	1489.3	1498.2	1314.06	1362.43	1314.06	1313.74	1299.05	1297.13	-0.0578387	-0.595425	-3.61432	0.0247236	0.147955	0.0578387	0.595425	3.61432	0.0247236	0.147955	0.988525	0.983979	0.9871	0.986997	0.991651	0.998443	0.993668	0.995945	0.99835	0.999123	0.988239	0.981047	0.985654	0.987119	0.992384	0.116728	0.374817	0.236403
022	0096	0.7017	1.14156	1.07727	0.653454	0.676216	0.7017	1.14156	1.07727	0.653454	0.676216	1518.26	1520.1	1716.67	1733.74	1520.98	1598.04	1520.98	1524.02	1491.45	1489.25	-0.120583	-0.989665	-4.9412	-0.199507	0.147323	0.120583	0.989665	4.9412	0.199507	0.147323	0.972596	0.978789	0.979984	0.973333	0.986992	0.995459	0.992713	0.992617	0.99544	0.998213	0.972045	0.973976	0.972687	0.972395	0.987753	0.674158	0.772506	0.761513
022	0129	-0.285325	-0.209636	-0.209112	0.001426	0.018624	0.285325	0.209636	0.209112	0.001426	0.018624	1196.57	1197.77	1402.17	1409.49	1189.83	1269.81	1189.83	1184.36	1213.03	1213.94	-0.0999233	-0.521089	-6.50352	0.461368	-0.0750935	0.0999233	0.521089	6.50352	0.461368	0.0750935	0.974555	0.97474	0.974769	0.972222	0.988186	0.996787	0.993231	0.993683	0.997201	0.998449	0.974049	0.972195	0.971309	0.974445	0.987804	0.581738	0.712386	0.709598
022	0130	-1.16232	-2.25677	-1.16255	-1.32828	-1.32423	1.16232	2.25677	1.16255	1.32828	1.32423	1656.62	1634.89	1846.84	1804.16	1660.67	1687.45	1660.67	1646.05	1569.48	1569.05	1.32021	2.33771	-1.59955	0.884223	0.0273615	1.32021	2.33771	1.59955	0.884223	0.0273615	0.971569	0.963085	0.965813	0.975225	0.988874	0.997307	0.996773	0.99702	0.997183	0.998206	0.977996	0.974353	0.975728	0.979552	0.989012	0.507405	0.578249	0.544503
022	0543	-0.138497	-0.317217	0.091197	-0.105676	-0.087593	0.138497	0.317217	0.091197	0.105676	0.087593	1102.66	1103.52	1275.37	1254.89	1104.16	1143.91	1104.16	1105.43	1072.42	1069.73	-0.0785294	1.61945	-3.53628	-0.115406	0.251209	0.0785294	1.61945	3.53628	0.115406	0.251209	0.97171	0.962235	0.966909	0.975632	0.987183	0.99678	0.995445	0.995746	0.997169	0.998893	0.971328	0.970026	0.971909	0.975069	0.988423	0.638671	0.631944	0.563848
023	0031	-0.790595	-1.49699	-1.10346	-0.702351	-0.830678	0.790595	1.49699	1.10346	0.702351	0.830678	1301.72	1280.37	1469.95	1443.77	1305	1324.11	1305	1269.88	1234.26	1230.32	1.65317	1.79718	-1.45389	2.72795	0.320288	1.65317	1.79718	1.45389	2.72795	0.320288	0.964449	0.96331	0.969782	0.959211	0.986504	0.99744	0.996244	0.996687	0.998143	0.998704	0.972406	0.971963	0.97545	0.972291	0.988073	0.592156	0.609328	0.472094
023	0058	0.294657	0.055801	-0.06524	-0.18198	-0.087572	0.294657	0.055801	0.06524	0.18198	0.087572	1426.46	1419.27	1563.08	1569.26	1421.06	1445.28	1421.06	1400.92	1330.96	1329.88	0.504967	-0.394593	-1.69056	1.42719	0.0807546	0.504967	0.394593	1.69056	1.42719	0.0807546	0.970166	0.974452	0.972855	0.96237	0.987328	0.996331	0.991986	0.99472	0.996542	0.998373	0.972626	0.972543	0.975719	0.96924	0.987714	0.587798	0.73236	0.516925
023	0061	0.586193	0.725218	0.941699	1.07165	0.990841	0.586193	0.725218	0.941699	1.07165	0.990841	1287.98	1286.11	1438.75	1453.31	1284.27	1343.37	1284.27	1286.23	1233.66	1233.46	0.145245	-1.00711	-4.49791	-0.152159	0.0161119	0.145245	1.00711	4.49791	0.152159	0.0161119	0.977357	0.974682	0.977567	0.978401	0.98727	0.997205	0.990352	0.993712	0.99696	0.99842	0.978061	0.969766	0.976175	0.97765	0.98734	0.508766	0.88243	0.649849
023	0081	0.372518	0.548288	1.31946	0.438072	0.474897	0.372518	0.548288	1.31946	0.438072	0.474897	1327.61	1322.71	1593.97	1607.97	1321.22	1445.26	1321.22	1332.45	1312.17	1313.87	0.36972	-0.874159	-8.96733	-0.846328	-0.129378	0.36972	0.874159	8.96733	0.846328	0.129378	0.977033	0.974881	0.981302	0.980934	0.990488	0.99737	0.993493	0.995067	0.996259	0.998544	0.978837	0.970616	0.97617	0.976781	0.989843	0.49243	0.849886	0.665692
023	0083	-0.144979	-0.136227	-0.110418	-0.0520803	0.0833361	0.144979	0.136227	0.110418	0.0520803	0.0833361	1366.69	1355.78	1501.12	1517.44	1369.4	1366.93	1369.4	1359.26	1263.82	1265.13	0.801663	-1.08131	0.180313	0.743084	-0.103501	0.801663	1.08131	0.180313	0.743084	0.103501	0.974411	0.974614	0.979901	0.975013	0.989834	0.997514	0.99148	0.994244	0.997511	0.998552	0.978303	0.969333	0.976174	0.978622	0.98931	0.477855	0.895408	0.647898
023	0084	0.440731	-0.0700704	0.139644	0.161726	0.198776	0.440731	0.0700704	0.139644	0.161726	0.198776	1216.51	1215.88	1377.69	1384.02	1214.49	1276.59	1214.49	1214.84	1154.44	1153.95	0.0511843	-0.457868	-4.98535	-0.0285572	0.0423997	0.0511843	0.457868	4.98535	0.0285572	0.0423997	0.974148	0.974459	0.975676	0.974085	0.987593	0.996867	0.991477	0.992842	0.996763	0.998597	0.974392	0.972223	0.973879	0.973928	0.987774	0.582458	0.719865	0.630373
002	1261	-0.0214115	-0.002649	-0.0369976	-0.0409635	-0.0335735	0.0214115	0.002649	0.0369976	0.0409635	0.0335735	1332.99	1332.2	1477.82	1472.66	1334.71	1363.45	1334.71	1333.45	1309.6	1310.36	0.0592798	0.34967	-2.12979	0.0947896	-0.0576464	0.0592798	0.34967	2.12979	0.0947896	0.0576464	0.986977	0.980988	0.982655	0.986515	0.991421	0.998365	0.994942	0.995964	0.998349	0.99882	0.987268	0.982701	0.984448	0.98698	0.991134	0.158953	0.288134	0.227164
023	0093	-0.34922	0.068566	-0.043847	-0.416441	-0.336684	0.34922	0.068566	0.043847	0.416441	0.336684	1237.43	1309.66	1477.41	1482.55	1247.81	1349.25	1247.81	1245.45	1215.58	1213.96	-5.67162	-0.347641	-7.81234	0.18906	0.133668	5.67162	0.347641	7.81234	0.18906	0.133668	0.982494	0.976455	0.974328	0.970446	0.987259	0.990448	0.994156	0.994398	0.996488	0.998599	0.95466	0.974779	0.972723	0.971386	0.987947	1.42495	0.741583	0.707067
023	0139	-0.0817388	0.121956	0.0265475	-0.125169	-0.0279536	0.0817388	0.121956	0.0265475	0.125169	0.0279536	1199.65	1183.46	1336.91	1328.04	1198.99	1239.63	1198.99	1192.63	1158.61	1158.61	1.3591	0.665303	-3.33323	0.531387	-0.000485495	1.3591	0.665303	3.33323	0.531387	0.000485495	0.973464	0.974138	0.980934	0.978221	0.989449	0.998412	0.995228	0.995581	0.997994	0.998762	0.98007	0.977368	0.980681	0.98081	0.989437	0.404128	0.510728	0.472344
023	0916	-0.1578	-0.614909	-0.358393	-0.318798	-0.328423	0.1578	0.614909	0.358393	0.318798	0.328423	1327.41	1312.4	1567.52	1561.85	1327.9	1426.09	1327.9	1319.94	1323.23	1324.85	1.1373	0.362134	-7.13124	0.601057	-0.122494	1.1373	0.362134	7.13124	0.601057	0.122494	0.970159	0.970041	0.976835	0.97173	0.990673	0.997472	0.99393	0.995219	0.99696	0.998566	0.975676	0.971797	0.976776	0.974651	0.990067	0.507884	0.716848	0.53539
023	0926	0.0695598	0.0743808	0.258406	-0.0339877	-0.0192514	0.0695598	0.0743808	0.258406	0.0339877	0.0192514	1361.55	1358.46	1600.46	1607.64	1358.55	1471.28	1358.55	1358.84	1321.38	1322.76	0.227757	-0.447344	-7.96766	-0.0212521	-0.104807	0.227757	0.447344	7.96766	0.0212521	0.104807	0.981127	0.978257	0.980187	0.982596	0.989836	0.997668	0.993897	0.994904	0.997531	0.998477	0.982237	0.976063	0.977936	0.982485	0.98931	0.407166	0.667	0.587698
023	0963	-0.148662	-0.250141	0.0347771	-0.0513412	0.0452058	0.148662	0.250141	0.0347771	0.0513412	0.0452058	1407.06	1414.51	1598.25	1593.87	1413.05	1478.12	1413.05	1414.49	1369.5	1369.7	-0.528162	0.274426	-4.50145	-0.101457	-0.0141008	0.528162	0.274426	4.50145	0.101457	0.0141008	0.976763	0.973799	0.976061	0.975825	0.989235	0.995839	0.99476	0.995151	0.996308	0.998455	0.974177	0.975122	0.976083	0.975323	0.989152	0.67779	0.61211	0.614294
023	1190	-0.0566454	-0.265727	-0.181385	0.0086388	0.0625624	0.0566454	0.265727	0.181385	0.0086388	0.0625624	1278.42	1274.88	1466.75	1465.09	1280.22	1362.29	1280.22	1276.7	1272.4	1269.14	0.277729	0.113197	-6.2118	0.275136	0.256586	0.277729	0.113197	6.2118	0.275136	0.256586	0.977092	0.975926	0.974789	0.977523	0.987497	0.997368	0.995023	0.99607	0.997417	0.998708	0.978448	0.976476	0.977493	0.978866	0.988764	0.472667	0.554325	0.505056
023	1262	0.0115135	-0.0998903	-0.031717	-0.044185	0.015917	0.0115135	0.0998903	0.031717	0.044185	0.015917	1210.93	1206.26	1369.66	1370.04	1211.06	1230.12	1211.06	1207.68	1195.15	1194.3	0.38645	-0.0281965	-1.56215	0.278761	0.0717215	0.38645	0.0281965	1.56215	0.278761	0.0717215	0.976802	0.977007	0.940063	0.978586	0.989754	0.997622	0.995594	0.998088	0.997709	0.998845	0.978689	0.976869	0.963737	0.97995	0.990109	0.45828	0.589444	0.915892
024	0985	0.767335	0.607026	0.647309	0.717783	0.672789	0.767335	0.607026	0.647309	0.717783	0.672789	1243.93	1250.81	1398.1	1411.16	1242.94	1288.67	1242.94	1245.46	1215.05	1217.93	-0.551962	-0.929726	-3.61259	-0.202681	-0.237288	0.551962	0.929726	3.61259	0.202681	0.237288	0.979809	0.981215	0.98447	0.978715	0.98903	0.996873	0.990375	0.991284	0.997169	0.99842	0.97711	0.976666	0.977961	0.977728	0.987857	0.384931	0.513372	0.453047
024	1063	0.209309	0.0414865	0.140732	0.147753	0.13624	0.209309	0.0414865	0.140732	0.147753	0.13624	1266.6	1262.55	1470.76	1472.07	1261.57	1348.64	1261.57	1266.32	1317.41	1317.23	0.3206	-0.0890243	-6.67135	-0.375499	0.0130503	0.3206	0.0890243	6.67135	0.375499	0.0130503	0.97232	0.97619	0.975177	0.975846	0.988645	0.996485	0.993438	0.994779	0.996009	0.998314	0.973873	0.975755	0.976642	0.974006	0.988709	0.374118	0.439926	0.366619
024	1171	0.153225	0.117691	0.035979	0.100434	0.123131	0.153225	0.117691	0.035979	0.100434	0.123131	1610.79	1600.67	1766.04	1773.96	1613.3	1628.92	1613.3	1601.56	1571.55	1570.15	0.630356	-0.447794	-0.963006	0.730801	0.0889618	0.630356	0.447794	0.963006	0.730801	0.0889618	0.978824	0.985782	0.985408	0.978542	0.992726	0.997568	0.99519	0.995503	0.99768	0.998987	0.981909	0.983575	0.983017	0.982117	0.993167	0.236176	0.35473	0.33872
005	0221	0.189727	0.292605	0.153772	0.169678	0.150043	0.189727	0.292605	0.153772	0.169678	0.150043	1477.14	1481.25	1733.99	1751.94	1472	1532.71	1472	1487.59	1469	1470.01	-0.277505	-1.02972	-4.04076	-1.05376	-0.0686138	0.277505	1.02972	4.04076	1.05376	0.0686138	0.981167	0.97964	0.982797	0.982596	0.990777	0.996806	0.991528	0.995077	0.995879	0.998545	0.979805	0.974596	0.980967	0.977418	0.990436	0.377404	0.632218	0.367276
020	0883	-0.0191374	-0.0029205	-0.0708742	-0.165978	-0.186411	0.0191374	0.0029205	0.0708742	0.165978	0.186411	1436.52	1420.26	1664.66	1674.24	1433.53	1508.97	1433.53	1416.94	1384.19	1386.54	1.13822	-0.574029	-5.12769	1.16402	-0.169856	1.13822	0.574029	5.12769	1.16402	0.169856	0.970602	0.976187	0.976914	0.970923	0.989323	0.9973	0.991877	0.994324	0.997391	0.99823	0.976123	0.973378	0.97676	0.976566	0.988486	0.50391	0.761759	0.606138
032	0095	-0.101871	0.009639	0.003212	-0.0342375	-0.0521525	0.101871	0.009639	0.003212	0.0342375	0.0521525	1363.41	1366.21	1450.11	1455.62	1367.04	1360.31	1367.04	1363.99	1296.11	1295.46	-0.205326	-0.379083	0.493452	0.223139	0.0505454	0.205326	0.379083	0.493452	0.223139	0.0505454	0.986546	0.984205	0.986452	0.984559	0.991152	0.998135	0.995797	0.997136	0.998406	0.999051	0.985523	0.982327	0.986007	0.985647	0.991392	0.217985	0.336792	0.198866
032	1101	0.644937	0.685098	0.182368	0.457966	0.434166	0.644937	0.685098	0.182368	0.457966	0.434166	1721.5	1329.82	1179.52	1179.02	1712.18	1086.25	1712.18	1332.4	1048.18	1041.38	25.6727	0.0419452	44.7344	24.9479	0.650613	25.6727	0.0419452	44.7344	24.9479	0.650613	0.761236	0.972198	0.970554	0.767488	0.980693	0.998241	0.993031	0.995098	0.998337	0.998851	0.858955	0.972401	0.974612	0.863228	0.983899	2.71484	0.580523	0.426796
036	1001	-1.62193	-0.95594	-1.39894	-1.28079	-1.40317	1.62193	0.95594	1.39894	1.28079	1.40317	1292.7	1362.5	1547.11	1589.75	1307.39	1468.26	1307.39	1368.21	1312.41	1317.43	-5.2579	-2.71873	-11.5913	-4.54623	-0.382325	5.2579	2.71873	11.5913	4.54623	0.382325	0.985488	0.981319	0.984526	0.984907	0.987299	0.991734	0.988756	0.989099	0.992469	0.997971	0.9596	0.967993	0.967907	0.96253	0.985415	1.08771	0.917092	0.949262
067	0029	0.271725	0.343907	0.25224	0.241666	0.160772	0.271725	0.343907	0.25224	0.241666	0.160772	1719.09	1698.36	1896.71	1882.95	1705.96	1733.45	1705.96	1698.61	1641.03	1638.89	1.21308	0.727843	-1.59836	0.431882	0.130338	1.21308	0.727843	1.59836	0.431882	0.130338	0.971237	0.970994	0.972497	0.9743	0.987168	0.99693	0.994311	0.995322	0.996102	0.997996	0.977141	0.974538	0.976253	0.976414	0.987824	0.520888	0.663238	0.533603
100	0015	0.405515	0.21717	0.126967	0.182981	0.221204	0.405515	0.21717	0.126967	0.182981	0.221204	1279.82	1274.9	1428.06	1425.69	1275.43	1331.57	1275.43	1271.99	1299.85	1300.43	0.385426	0.166607	-4.30741	0.269528	-0.0445354	0.385426	0.166607	4.30741	0.269528	0.0445354	0.978992	0.982325	0.976981	0.979897	0.992006	0.997902	0.996651	0.997478	0.99788	0.99895	0.980879	0.983143	0.981923	0.981218	0.991785	0.291304	0.219999	0.300532
100	0035	-0.113957	0.153156	0.179021	-0.0603703	-0.0665673	0.113957	0.153156	0.179021	0.0603703	0.0665673	1316.9	1315.4	1486.86	1501.43	1317.38	1385.19	1317.38	1315.89	1326.51	1328.03	0.114352	-0.975314	-5.01779	0.113108	-0.114188	0.114352	0.975314	5.01779	0.113108	0.114188	0.978967	0.982224	0.979382	0.97956	0.989559	0.997496	0.992835	0.996115	0.997568	0.998531	0.979551	0.977457	0.981541	0.980138	0.989014	0.339701	0.562317	0.299187
100	0047	0.640602	-0.006964	0.107352	0.0063375	0.0293505	0.640602	0.006964	0.107352	0.0063375	0.0293505	3366.61	1438.98	1666.91	1658.83	1446.74	1525.82	1446.74	1439.34	1472.94	1472.62	80.2242	0.485652	-5.32078	0.512932	0.0215552	80.2242	0.485652	5.32078	0.512932	0.0215552	0.4072	0.978433	0.984857	0.979919	0.992639	0.991877	0.99508	0.995237	0.997899	0.998976	0.570537	0.980809	0.983356	0.982433	0.992746	5.48958	0.350269	0.286358
100	0069	-0.060271	-0.0893176	-0.106586	-0.104848	-0.117518	0.060271	0.0893176	0.106586	0.104848	0.117518	1475.23	1488.65	1675	1664.15	1476.75	1563.16	1476.75	1486.75	1510.97	1512.45	-0.905345	0.64946	-5.68508	-0.674559	-0.0979541	0.905345	0.64946	5.68508	0.674559	0.0979541	0.984174	0.977105	0.982392	0.98504	0.990806	0.996422	0.995757	0.996098	0.996877	0.9985	0.979717	0.980284	0.982973	0.981718	0.990326	0.385378	0.358557	0.29549
141	0790	-0.182858	-0.0292605	-0.427231	-0.275704	-0.298063	0.182858	0.0292605	0.427231	0.275704	0.298063	1218.93	1214.33	1408.76	1409.44	1209.82	1290.07	1209.82	1218.25	1206.9	1206.59	0.378197	-0.0488344	-6.42005	-0.693761	0.0253264	0.378197	0.0488344	6.42005	0.693761	0.0253264	0.974448	0.971631	0.978323	0.978086	0.987811	0.997301	0.995057	0.995605	0.996451	0.998536	0.976284	0.971389	0.974919	0.974685	0.987928	0.509333	0.848662	0.671247
009	0751	-0.153218	-0.227305	-0.393989	-0.0776504	-0.04831	0.153218	0.227305	0.393989	0.0776504	0.04831	1475.15	1463.92	1550.6	1559.33	1462.84	1462.25	1462.84	1462.44	1404.3	1405.96	0.763921	-0.561472	0.0407283	0.0276175	-0.117694	0.763921	0.561472	0.0407283	0.0276175	0.117694	0.977453	0.983732	0.98399	0.979305	0.990822	0.997989	0.994791	0.990097	0.997277	0.99868	0.98118	0.980964	0.969246	0.979433	0.990231	0.290048	0.39754	0.650807
009	0842	0.213834	-0.156166	-0.203599	0.0260176	-0.0461911	0.213834	0.156166	0.203599	0.0260176	0.0461911	1549.21	1518.89	1590.54	1595.8	1549.78	1488.22	1549.78	1520.41	1460.98	1459.05	1.97627	-0.329745	4.05273	1.9133	0.132701	1.97627	0.329745	4.05273	1.9133	0.132701	0.967831	0.983992	0.985436	0.970609	0.990742	0.998208	0.995411	0.996538	0.998515	0.998945	0.977395	0.98237	0.984811	0.979894	0.9914	0.335951	0.331514	0.2122
009	0862	0.74937	1.015	0.601599	0.855966	0.817518	0.74937	1.015	0.601599	0.855966	0.817518	1370.11	1342.75	1351.3	1348.43	1374.31	1264.22	1374.31	1342.68	1268.98	1269.91	2.01711	0.212521	8.34484	2.32847	-0.0730296	2.01711	0.212521	8.34484	2.32847	0.0730296	0.962528	0.981569	0.970387	0.964174	0.991048	0.997834	0.996712	0.997114	0.998409	0.9989	0.972235	0.982612	0.977414	0.975399	0.990686	0.494802	0.24234	0.28001
012	0712	0.88035	-1.29964	-1.57731	1.23579	0.564125	0.88035	1.29964	1.57731	1.23579	0.564125	1260.31	1641.55	1411.9	1571.05	1260.99	1414.17	1260.99	1558.17	1225.12	1258.48	-26.2754	-10.6711	-11.4522	-21.0834	-2.68572	26.2754	10.6711	11.4522	21.0834	2.68572	0.985289	0.992998	0.993028	0.991709	0.989945	0.961885	0.966762	0.970522	0.970666	0.995657	0.855829	0.940001	0.939241	0.887149	0.976635	7.01545	2.19197	2.04849
012	0720	0.871996	0.0387052	0.341663	0.253348	0.294254	0.871996	0.0387052	0.341663	0.253348	0.294254	1752.67	1736.8	1403.19	1376.27	1214.78	1275.92	1214.78	1216.8	1211.03	1209.19	0.909345	1.93691	-4.90924	-0.165604	0.152175	0.909345	1.93691	4.90924	0.165604	0.152175	0.964604	0.967341	0.978046	0.984276	0.989968	0.996145	0.9972	0.997336	0.997993	0.999019	0.971114	0.976697	0.981823	0.983447	0.990708	0.481305	0.314371	0.196557
018	0043	-0.0672195	0.128983	0.003766	0.0778397	0.064589	0.0672195	0.128983	0.003766	0.0778397	0.064589	1424.2	1428.23	1590.28	1582.33	1423.94	1486.47	1423.94	1432.17	1420.23	1420.58	-0.282489	0.50058	-4.29644	-0.576212	-0.0247261	0.282489	0.50058	4.29644	0.576212	0.0247261	0.983985	0.977058	0.981764	0.984531	0.99136	0.997214	0.994839	0.995328	0.996859	0.99869	0.982593	0.979502	0.982028	0.981692	0.991237	0.265662	0.401591	0.308159
018	0633	1.4811	-0.361891	-0.388726	-0.277016	-0.374096	1.4811	0.361891	0.388726	0.277016	0.374096	1606.74	1146.68	1348.14	1369.21	1115.29	1237.8	1115.29	1156.52	1206.9	1217.7	33.4175	-1.55129	-10.4124	-3.62942	-0.891309	33.4175	1.55129	10.4124	3.62942	0.891309	0.341572	0.976971	0.978924	0.920735	0.983497	0.941057	0.988084	0.991235	0.987807	0.997083	0.398639	0.969397	0.973509	0.90401	0.979101	17.2314	0.797232	0.509438
018	0682	0.777397	0.540992	0.564527	0.68013	0.683608	0.777397	0.540992	0.564527	0.68013	0.683608	1343.68	1258.93	1465.72	1457.3	1347.86	1327.2	1347.86	1259.95	1263.49	1261.21	6.51294	0.576662	1.5451	6.74229	0.181051	6.51294	0.576662	1.5451	6.74229	0.181051	0.917318	0.97173	0.97146	0.914404	0.986911	0.997474	0.993624	0.995497	0.997365	0.998644	0.947212	0.974536	0.976711	0.945247	0.987818	0.742656	0.607331	0.44989
072	0315	0.0011325	-0.423011	-0.0051515	-0.114542	-0.084675	0.0011325	0.423011	0.0051515	0.114542	0.084675	1483.39	1493.82	1656.88	1664.05	1492.91	1547.46	1492.91	1485.4	1471.6	1471.82	-0.700927	-0.431348	-3.58837	0.504129	-0.0146911	0.700927	0.431348	3.58837	0.504129	0.0146911	0.986478	0.98772	0.985552	0.978605	0.992177	0.99703	0.99523	0.996188	0.997618	0.998859	0.983021	0.985589	0.985539	0.981071	0.992104	0.27234	0.262761	0.223304
133	0488	-0.546508	-0.836167	-0.481605	-0.612637	-0.601568	0.546508	0.836167	0.481605	0.612637	0.601568	1360.81	1374.73	1474.55	1494.97	1364.56	1401.22	1364.56	1371.27	1321.48	1323.89	-1.01793	-1.3755	-2.65101	-0.490367	-0.182601	1.01793	1.3755	2.65101	0.490367	0.182601	0.984879	0.984339	0.986294	0.982734	0.989538	0.996593	0.995534	0.99642	0.99701	0.998404	0.979881	0.977587	0.980566	0.980341	0.988649	0.376485	0.516136	0.397689
[truncated: 2 more columns]
