# Supplementary material for: Improving the SIENA performance using BEaST brain extraction
Source: PLoS One. 2018 Sep 20;13(9):e0196945. doi: 10.1371/journal.pone.0196945 (PMC6147402; doi:10.1371/journal.pone.0196945)
Supplement: S2 File — (XLSX) [file pone.0196945.s002.xlsx]

## Sheet: Table3adni
idx	SiteID	SubjID	Vanilla	Popescu	Cover	CBET	BEaST
1	002	0295	0.318429	0.366312	0.573643	0.196781	0.225815
2	002	0413	-0.0450082	0.200515	-0.10272	-0.169432	-0.181893
3	002	0559	-1.27729	-1.11431	-0.211827	-1.13908	-1.1144
4	002	0619	-0.58432	-0.611563	-0.399142	-0.115058	-0.11516
5	002	0685	0.16571	-1.69272	-1.61132	-1.62435	-1.61937
6	002	0816	-2.50324	-3.60103	-3.16728	-2.95332	-2.95176
7	002	0938	-0.517869	-0.526605	-0.484399	-0.427179	-0.409806
8	002	1018	-1.33203	-1.26246	-1.18084	-1.15277	-1.16284
9	002	1261	-0.49926	-0.565353	-0.328729	-0.388252	-0.322435
10	002	1280	-0.913366	-1.00323	-0.840742	-0.876249	-0.79883
11	003	0907	-2.43228	-1.91095	-1.82341	-1.7905	-1.51462
12	003	0981	-1.31603	-0.541832	0.0170995	-0.155654	-0.178737
13	003	1257	-3.67076	-4.75056	-5.32996	-4.72168	-4.73388
14	005	0223	-0.113235	0.600766	-0.43602	0.031745	-0.179685
15	005	0553	-0.481154	-0.229127	0.062245	-0.726142	-0.67898
16	005	0602	0.593007	1.00205	0.7045	0.426998	0.337266
17	005	0610	-0.132464	0.55472	-1.01193	-0.244278	-0.228743
18	005	0814	-2.38692	-1.82661	-2.34185	-2.5775	-2.52093
19	005	1341	-0.927127	-0.347066	-0.761936	-0.62787	-0.630347
20	006	0498	-0.780528	-0.677601	-0.67423	-0.711935	-0.722388
21	006	0547	-2.68252	-2.24322	-1.87662	-2.37259	-2.26606
22	006	0681	-1.4529	-1.91196	-1.45731	-1.45643	-1.48988
23	006	0731	-0.521312	0.0288457	-0.362021	-0.401085	-0.413133
24	007	0068	0.330165	1.26181	0.102148	0.156279	0.223445
25	007	0070	-1.30924	-0.985494	-1.10545	-1.07833	-1.02736
26	007	0316	-0.588739	-1.22948	-1.33125	-0.578475	-0.668237
27	007	1206	0.424538	1.21014	1.83862	0.694453	0.656384
28	007	1222	-1.60884	-0.195553	-1.24267	-1.17546	-1.16686
29	007	1339	-1.51937	-1.63516	-1.66471	-1.55235	-1.46593
30	010	0067	-1.50654	-0.684849	-0.169418	-0.34621	-0.286446
31	010	0419	-2.08562	-0.788199	-0.585971	-0.510703	-0.532238
32	010	0472		-0.134409	-0.771687	-0.853248	-0.849264
33	010	0786	-2.66678	-0.764223	-0.199374	0.0187185	-0.0781788
34	010	0829	-3.08405	-2.59001	-2.3394	-2.37025	-2.43132
35	011	0003	-1.6558	-1.69251	-1.51777	-1.8526	-1.85819
36	011	0005	-0.338572	-0.913152	-0.241834	-0.27944	-0.304663
37	011	0010	-2.65788	-2.38092	-2.28625	-2.60731	-2.621
38	011	0016	-0.420895	-1.51736	-0.412683	-0.433278	-0.366361
39	011	0021	-0.433327	0.133191	-0.235657	-0.302073	-0.275496
40	011	0022	-0.148836	0.176634	-0.0843788	-0.128338	-0.200042
41	011	0023	-2.54666	-2.24492	-2.08256	-2.43322	-2.42855
42	011	0053	-1.66281	-1.9568	-1.17072	-1.91874	-1.95555
43	011	0183	-4.2881	-3.80925	-4.08024	-4.29945	-4.28005
44	012	0637	-0.143811	-0.0306185	-0.254565	-0.158356	-0.17382
45	012	0689	0.651905	-0.514074	-0.721176	-1.04696	-0.985896
46	012	0803	1.23054	-1.29189	-1.40704	-1.49435	-1.38712
47	012	1009	-0.661021	-0.740927	-0.82004	-0.584713	-0.586418
48	012	1133	-1.99653	-0.928122	-0.392033	-0.994966	-0.790275
49	013	0502	-2.35094	-2.2961	-2.15482	-2.16795	-2.15285
50	013	0575	2.43641	1.19571	1.8684	1.90828	1.60908
51	013	1035	-0.952375	-0.129858	-0.256917	-0.752459	-0.496184
52	013	1205	0.635553	0.140985	0.154674	0.45652	0.60505
53	014	0328	-2.68815	-2.34275	-2.50687	-2.75764	-2.58957
54	014	0519	-1.2371	-0.704965	-0.894616	-1.0402	-0.912706
55	014	0520	0.720897	0.853233	0.519061	0.545026	0.470793
56	014	0548	-0.516158	-1.00201	-0.441911	-0.512953	-0.476258
57	014	0558	-0.766216	-0.914532	-0.70238	-0.663933	-0.730807
58	014	1095	-2.55001	-2.02838	-2.26452	-2.55531	-2.33853
59	016	0359	-2.01498	-0.846503	-1.10393	-1.47558	-1.43173
60	016	0538	-0.438113	0.0460885	-0.315206	0.310046	-0.0113435
61	016	0991	-1.63761	-1.52614	-2.06144	-2.72968	-2.41163
62	018	0286	-1.33753	-0.617932	-0.820762	-1.27745	-1.18127
63	018	0335	-1.09165	-0.460097	-0.559253	-0.750599	-0.680682
64	018	0369	-0.993659	-0.964422	-0.942446	-1.06686	-1.04659
65	018	0425	-1.92792	-2.01936	-2.10026	-1.77194	-1.62811
66	020	0097	-0.025017	-0.338975	-0.318561	-0.173312	-0.131982
67	020	0213	-1.57006	-1.52025	-0.720182	-1.56838	-1.40055
68	020	0899	-3.0327	0.0548775	-0.736828	-0.907247	-0.814998
69	020	1288	-0.360704	-0.249699	-0.324046	-0.329251	-0.346376
70	021	0159	-0.834344	-0.142653	-0.831519	-2.01722	-2.0177
71	021	0337	-2.46907	-0.912543	-1.27766	-1.40875	-1.20822
72	021	0343	-1.868	-1.67124	-1.46012	-1.6592	-1.50833
73	021	0642	-0.768456	-0.527832	-1.23957	-0.97353	-0.958805
74	021	0647	0.256415	-0.0124429	-0.368734	-0.688469	-0.585989
75	021	0753	-1.22742	-2.17348	-2.41536	-2.18103	-1.84318
76	021	0984	-2.59674	-2.29455	-2.50617	-2.92116	-2.87316
77	021	1109	-0.549496	-1.72707	-1.95426	-1.92744	-1.75705
78	022	0014	-0.257274	-0.574075	-0.447275	-0.128603	-0.112817
79	022	0066	0.44812	0.072302	0.205605	0.216965	0.104174
80	022	0096	0.613582	0.738618	0.371502	0.477643	0.379991
81	022	0129	-1.82134	-1.59112	-1.2472	-2.31064	-2.22225
82	022	0130	-0.609681	-0.495351	-0.793701	-0.536063	-0.57063
83	022	0543	-1.60605	-4.20465	-4.16479	-0.629665	-4.92487
84	023	0031	-0.626576	-1.54661	-1.06707	-0.870466	-1.00002
85	023	0058	0.655831	-0.252671	-0.0393385	0.080949	0.0304413
86	023	0061	0.332765	0.863578	0.72358	0.730935	0.681381
87	023	0081	-1.0148	-1.27834	-0.810176	-0.64387	-0.641042
88	023	0083	-1.38339	-1.44891	-1.4165	-1.1519	-1.13535
89	023	0084	-0.409801	-0.82851	-1.35468	-0.934646	-0.967422
90	023	0093	-2.83219	-4.25546	-5.24656	-4.36712	-4.16019
91	023	0139	-4.77301	-3.78643	-4.1507	-3.21379	-3.40889
92	023	0916	-2.19011	-1.3625	-1.70223	-1.99932	-1.73166
93	023	0926	-0.741596	-0.620493	-0.569838	-0.806273	-0.85129
94	023	0963	-1.46011	-1.51367	-1.26643	-1.55636	-1.47386
95	023	1190	-1.07015	-0.91803	-0.536722	-0.979033	-0.923283
96	023	1262	-3.15169	-2.98074	-2.85258	-3.02167	-2.86752
97	024	0985	-1.22497	-1.13932	-0.84922	-1.05708	-0.975629
98	024	1063	-0.818029	-0.813086	-0.64306	-0.658148	-0.654269
99	024	1171	-1.27201	-1.51411	-1.23193	-1.30283	-1.26296
100	024	1307	-0.547885	-0.513361	-0.444499	-0.100735	-0.0376849
101	027	0074	-0.289778	-0.429355	-0.413734	-0.239186	-0.218268
102	027	0118	0.120327	-1.96324	-1.75045	-0.782003	-0.715013
103	027	0120	-0.433849	-0.0699367	-0.328411	-0.383129	-0.408923
104	027	0403	-1.35923	-1.41728	-1.33198	-1.36271	-1.35316
105	027	0404	0.273815	-0.049715	0.159561	0.0556041	0.155027
106	027	0850	-1.99514	-1.64865	-1.37684	-1.88909	-1.86621
107	027	1081	-1.17598	-1.39854	-1.86004	-1.30061	-1.03299
108	027	1082	-2.08548	-1.60136	-1.6543	-1.97737	-1.81971
109	027	1254	-5.57341	-5.5609	-6.17572	-4.46504	-3.89147
110	027	1385	-1.60112	-0.339695	-1.46524	-1.50215	-1.46337
111	029	0824	-0.338726	-0.218814	-0.157475	-0.106196	-0.17231
112	029	0836	-1.44579	-1.6436	-1.34652	-1.50246	-1.40187
113	029	0843	-0.900377	-0.463687	-0.707758	-0.803948	-0.760132
114	029	0845	-0.96944	-0.553938	-0.515689	-1.06885	-0.929771
115	029	0866	-0.865372	-0.481681	-0.721274	-0.862899	-0.965886
116	029	0999	-3.43708	-2.45582	-2.89637	-3.38955	-3.14282
117	029	1056	-2.13394	-2.41785	-1.91624	-2.175	-1.99165
118	031	0321	-0.757913	-0.267072	-0.743539	-0.41246	-0.583383
119	031	0554	-1.14071	-1.15115	-0.917458	-0.921578	-0.832407
120	031	0618	-0.908505	-0.523	-2.21641	-0.322452	-0.216729
121	031	1209	-1.39623	-1.2108	-1.5476	-1.22588	-1.20037
122	032	0147	-2.39936	-2.64257	-2.37241	-2.43682	-2.44449
123	032	0400	-2.34877	-1.76594	-2.43038	-1.97218	-1.92345
124	032	0479	-1.8622	-1.38075	-1.5791	-1.35271	-1.25425
125	032	0677	-0.103664	-0.0445193	-0.264979	-0.373157	-0.37691
126	032	1169	-1.09927	-0.166863	0.180602	0.267706	0.121431
127	033	0516	-0.127417	-0.374752	-0.19949	-0.11411	-0.164895
128	033	0724	-2.2653	-3.3784	-2.62046	-2.16194	-2.11687
129	033	0733	-1.21598	-0.778263	-0.906108	-0.921507	-0.87588
130	033	0734	-0.812218	-1.36589	-1.11737	-0.875715	-0.864498
131	033	0739	-2.20722	-1.47422	-1.5689	-1.66217	-1.59102
132	033	0741	-0.0486412	-0.147996	-0.0868341	-0.0181409	0.0299746
133	033	0889	0.099835	0.600057	0.159428	-0.822381	-0.900213
134	033	0920	-0.224233	-0.107707	0.0611436	0.113849	0.145419
135	033	0923	-0.103474	-0.167663	-0.16586	-0.006753	-0.0306079
136	033	1016	-0.631385	-0.312379	-0.508749	-0.523039	-0.528278
137	033	1086	-1.30926	-1.09108	-1.02421	-0.974839	-0.996726
138	033	1098	-1.98279	-2.3822	-1.61097	-2.01464	-1.89903
139	033	1281	-2.05083	-2.07675	-1.81327	-1.8565	-1.79528
140	033	1283	-2.08452	-1.66651	-1.29808	-1.7412	-1.66725
141	033	1285	0.0789887	0.308367	0.135289	0.263452	0.234488
142	033	1308	-2.24958	-1.8397	-1.6832	-1.9811	-1.78662
143	035	0048	-0.005289	-0.919656	0.157906	-0.368074	-0.329815
144	035	0156	0.782491	0.870103	0.508082	0.518945	0.507665
145	035	0341	-1.55031	-1.6928	-1.61927	-1.87167	-1.81306
146	035	0555	-1.40501	-1.0679	-1.31023	-1.33559	-1.24903
147	036	0576	1.13347	1.46767	0.903586	1.033	1.11346
148	036	0577	-2.79495	-2.09219	-2.70202	-2.54767	-2.51459
149	036	0672	-0.0997606	-0.137125	-0.228641	-0.419811	-0.412454
150	036	0759	-1.15816	-1.23361	-0.572036	-0.869578	-0.81633
151	036	0760	-2.12298	-2.0682	-1.92948	-2.21256	-2.22838
152	036	0813	-0.795231	-0.2494	-0.4453	-0.654973	-0.565657
153	036	1023	-0.570985	-0.547612	-0.0298223	-0.296235	-0.273868
154	037	0303	0.0235125	0.0857383	0.146465	0.394282	0.368559
155	037	0327	-0.29692	-0.433584	-0.609645	-0.469965	-0.425895
156	037	0454	-0.768136	-1.26615	-1.08201	-0.620433	-0.647378
157	037	0467	-1.45742	-1.22982	-1.72948	-1.46974	-1.47673
158	037	0627	-3.25931	-4.39016	-3.7079	-3.18577	-3.08112
159	041	0125	0.606963	0.0859915	0.218309	0.0580245	0.117482
160	041	0262	2.58086	-0.965454	-1.06787		-0.520366
161	041	0898	-1.24724	-0.708114	-1.16792	-1.24158	-1.15644
162	041	1002	-0.52881	-0.452751	-0.691823	-0.574264	-0.479374
163	041	1368	-2.0749	-1.40194	-1.70568	-2.16965	-1.98262
164	051	1123	-0.663521	-0.553492	-0.689597	-0.943506	-0.889325
165	051	1296	-1.20068	-0.719966	-0.503644	-0.803241	-0.833101
166	052	0951	-1.13479	-1.30529	-0.992389	-1.12028	-1.06655
167	052	1250	0.11024	0.185189	0.231957	0.245181	0.241345
168	052	1251	-0.623619	-0.92906	-0.378072	-0.525191	-0.597561
169	053	1044	-2.66789	-2.6599	-2.40278	-2.66488	-2.66058
170	057	0474	-1.56201	-1.59372	-1.98935	-2.19741	-2.2193
171	057	0643	-0.0469135	-0.268193	-0.0608863	-0.181167	-0.187722
172	057	0779	-1.88516	-2.41139	-1.65311	-1.7323	-1.70454
173	057	0818	-0.285286	-0.889091	-0.369196	-0.204287	-0.216185
174	057	0934	-2.04931	-1.85068	-1.56671	-2.05931	-2.19884
175	057	1371	-2.6987	-1.81984	-2.01733	-2.22831	-2.27482
176	057	1373	-2.74024	-2.83883	-2.4086	-2.38288	-2.44942
177	057	1379	-0.174525	-0.357418	-0.430191	-0.538832	-0.581913
178	062	0535	-1.90993	-1.92877	-1.87095	-1.60551	-1.68802
179	062	0578	-0.466803	-0.969529	-0.558318	-0.593952	-0.61473
180	062	0690	-1.57426	-0.871772	-0.953021	-1.10959	-1.16665
181	062	0730	-2.01837	-2.01998	-1.92555	-2.07274	-2.09402
182	062	0768	-1.45139	-2.4445	-1.044	-1.17641	-1.26319
183	062	0793	-2.20565	-1.24392	-1.6262	-1.84924	-1.83457
184	062	1099	-1.26774	-0.498212	-1.11393	-1.19058	-1.26174
185	067	0019	-1.40666	-0.429465	-1.63606	-1.30536	-1.32547
186	067	0056	-0.339601	-0.480704	-0.378947	-0.348671	-0.277839
187	067	0059	0.498789	-0.162584	-0.414966	-0.53026	-0.52277
188	067	0076	-2.31415	-1.21548	-2.34409	-1.90583	-1.86817
189	067	0110	-1.53916	-1.54937	-1.31333	-1.94752	-1.88871
190	067	0177	-1.39064	-1.20883	-1.42996	-1.76275	-1.75212
191	067	0257	-1.84062	-0.73916	-1.90081	-1.80038	-1.92426
192	068	0109	-0.474498	-2.10662	-2.29315	-2.43	-2.42549
193	068	0127	0.359995	0.562651	-0.547802	-0.588044	-0.538663
194	068	0210	0.80649	-0.956095	-0.704349	-0.793898	-0.703337
195	068	0473	-0.740128	-0.607152	-0.396942	-0.295527	-0.26002
196	073	0089	-0.685569	-1.00273	-0.342111	-0.307142	-0.409019
197	073	0311	0.360264	0.593444	1.10088	0.549102	0.513015
198	073	0312	-1.65634	-1.79613	-1.75704	-1.62783	-1.59739
199	073	0386	-1.00344	-0.747466	-1.03888	-1.11381	-1.22052
200	073	0565	-4.33434	-4.63924	-5.15751	-4.4513	-4.43098
201	082	1256	-0.808631	0.2721	0.08812	-0.444032	-0.453456
202	082	1377	-1.52	-2.3416	-1.61285	-1.34534	-1.24923
203	094	0526	-0.518718	-0.0038778	-0.467216	-0.529071	-0.554136
204	094	0692	-0.19907	-0.287125	-0.431325	-0.304721	-0.418413
205	094	0711	-0.584653	-0.55102	-0.333534	-0.306565	-0.394066
206	094	1027	-1.7494	-1.05198	-1.36857	-1.53751	-1.48758
207	094	1090	-2.03686	-2.43269	-1.82861	-1.99346	-1.8443
208	094	1164	-1.7628	-2.23665	-2.5747	-1.76503	-1.73791
209	094	1241	-0.21032	0.488546	-0.495522	-0.235878	-0.226525
210	094	1267	-0.400474	-0.628537	-0.422873	-0.423663	-0.428426
211	094	1397	-5.72483	-5.6812	-6.03766	-4.81308	-5.27002
212	094	1402	-2.9614	-2.65732	-3.03671	-3.27684	-3.05465
213	098	0149	-0.08755	-2.1284	-1.87733	-2.32493	-1.83204
214	098	0171	-1.81276	-1.96909	-2.14553	-2.11574	-2.12548
215	098	0172	0.0325598	-0.19547	0.00727036	-0.0203759	-0.073412
216	098	0896	-0.80287	-0.693508	-0.816041	-0.691947	-0.625076
217	099	0040	-0.528467	-0.243917	-0.715491	-0.351711	-0.406064
218	099	0090	0.118904	-1.04264	-0.0649611	0.189667	0.271238
219	099	0352	-0.550979	-1.15836	-1.00999	-0.927703	-0.875156
220	099	0372	-4.22455	-5.1034	-3.75624	-3.9607	-3.70616
221	099	0470	-1.99683	-1.77279	-1.51611	-1.65838	-1.62298
222	099	0533	0.129864	-0.177525	0.196527	0.134857	0.165578
223	099	0534	-0.687882	-0.723262	-0.609125	-0.46466	-0.41406
224	099	1144	-1.727	-0.919642	-1.92611	-1.43929	-1.44497
225	109	0967	-1.51505	-0.880749	-0.997974	-1.35872	-1.34691
226	109	1014	-1.71012	-1.86216	-1.60193	-0.533714	-0.552215
227	109	1157	-1.57126	-0.17291	-0.544181	-0.715188	-0.632275
228	114	0166	-0.917628	-0.466972	-0.266528	-0.795087	-0.757531
229	114	0173	-2.16773	-0.584435	-1.3564	-1.70101	-1.60109
230	114	0374	-1.58258	-1.74256	-1.3406	-1.38482	-1.3585
231	114	0416	-0.4202	-0.9999	-0.621684	-0.462676	-0.589071
232	114	0601	-1.34471	-1.21158	-1.5209	-1.23849	-1.21068
233	114	0979	-0.6591	-1.32597	-2.199	-1.43736	-1.22865
234	116	0370	-3.26634	-3.58401	-4.34199	-3.24336	-3.15535
235	116	0382	0.187046	0.170677	0.226452	0.262274	0.23614
236	116	0392	-1.99426	0.29171	-1.4846	-1.97497	-2.3158
237	116	0487	0.307304	-1.13673	-1.63697	-1.27475	-1.21308
238	116	0648	-1.22246	-1.50057	-1.16288	-1.00758	-1.03001
239	116	0657	-0.736278	-1.13554	-0.598778	-1.0305	-1.12662
240	116	1232	-0.497876	-0.248305	-0.648753	-0.249455	-0.25472
241	116	1249	-1.01652	-1.07013	-0.783624	-0.717749	-0.664771
242	123	0072	0.058825	-1.1172	0.240874	-0.310389	-0.323843
243	123	0088	-3.70513	-2.44874	-3.53446	-3.52214	-3.51281
244	123	0091	-1.01864	-0.112344	-0.745672	-0.952237	-0.967823
245	123	0094	-2.955	-3.32767	-2.70262	-3.08043	-3.0407
246	123	0106	-2.06394	-2.05803	-1.39261	-1.9328	-1.79803
247	123	0113	-1.12868	-1.16751	-1.18004	-1.20876	-1.29895
248	123	0162	-1.07537	-0.326866	-0.936868	-1.00694	-0.972276
249	123	0298	-0.0429085	-0.196661	0.325403	-0.214785	-0.216585
250	126	0605	-1.00949	-0.826474	-1.04213	-1.28173	-1.15278
251	126	0606	-1.69387	-1.64678	-1.90229	-1.90948	-1.90685
252	126	0680	-1.18803	-1.21057	-0.966727	-0.901458	-0.894894
253	126	0784	-1.79454	-1.942	-2.22037	-2.15725	-2.26689
254	126	0891	-3.39369	-2.14513	-3.10609	-2.81272	-2.96792
255	126	1221	-2.53993	-0.313337	-1.53295	-1.17776	-1.20114
256	127	0259	0.273285	-0.470732	0.869287	0.495924	0.499018
257	127	0260	0.474238	0.145728	0.430223	0.383636	0.369224
258	127	0431	-1.35246	-0.947072	-1.03403	-1.12203	-1.07511
259	127	0622	-0.398554	-0.632289	-0.388138	-0.454624	-0.386874
260	127	0684	-1.15311	-1.28913	-1.29475	-1.11451	-1.07835
261	127	0754	-1.92189	-1.81681	-1.80442	-1.76232	-1.76815
262	127	0844	-2.00508	-1.83526	-1.70814	-1.85844	-1.81652
263	127	1382	-3.39729	-2.8819	-2.41215	-2.48263	-2.29313
278	128	1242	-1.71767	-2.09204	-1.62184	-1.86481	-1.85558
279	129	0778	0.030385	-0.671833	-0.278214	0.070416	0.0602841
280	130	0232	-0.299247	-0.762879	-0.736765	-0.526213	-0.449528
281	130	0886	-0.223057	-2.35138	-0.165463	-0.131266	-0.134907
282	130	0956	0.0268101	0.154452	0.035493	0.0185718	-0.018295
283	130	0969		0.179421	0.328578	0.329496	0.331295
284	130	1200	-2.96499	-1.14716	-0.199795	-0.555066	-0.402616
285	130	1201	0.634673	0.770236	0.9335	0.774634	0.647474
286	130	1290	-0.966193	-0.917282	-0.839784	-1.00975	-0.978133
287	130	1337	-1.04697	-1.15451	-1.02822	-0.985122	-0.885211
288	131	0123	-0.239683	-0.282632	0.159972	-0.0792015	0.0081978
289	131	0441	-3.0244	-3.29696	-3.4787	-2.6626	-2.60571
290	131	0457	0.788551	-1.37523	-1.42694	-1.18243	-1.15084
291	131	0497	-0.841304	-0.845547	-0.788232	-0.5239	-0.428955
292	131	1301	-0.590838	-0.505934	-0.459223	-0.490169	-0.542537
293	133	0433		-0.140407	0.0265096	0.00611175	-0.0058087
294	133	0525	-1.23202	-1.51415	-0.857105	-1.12063	-1.10081
295	133	1055	-1.91607	-2.07285	-2.29274	-1.45219	-1.43635
296	133	1170	-0.975759	-0.987201	-0.818812	-0.94247	-0.933473
297	136	0086	1.46126	2.51592	1.79432	1.62842	1.46823
298	136	0184	0.0421855	0.892984	-0.151333	-0.32742	-0.339361
299	136	0186	-0.881953	-1.0213	-0.624967	-0.63764	-0.683415
300	136	0194	0.0729933	0.0944684	0.0209355	0.0292429	-0.077943
301	136	0196	-2.12729	-1.44674	-1.11558	-1.84356	-1.78693
302	136	0299	-2.27527	-1.73818	-1.55994	-1.68154	-1.62591
303	136	0300	-0.453253	-0.311394	-0.462923	-0.518342	-0.488932
304	136	0426	-0.780759	-1.13699	-0.468844	-0.788796	-0.80935
305	137	0283	0.830403	0.399106	0.846835	0.843496	0.956816
306	137	0301	1.83958	1.76277	1.55758	1.69144	1.63656
307	137	0366	-4.08645	-4.03916	-4.35665	-3.89529	-3.78494
308	137	0459	0.442052	0.399458	0.022258	-0.124237	-0.179924
309	137	0686	0.073577	0.06952	0.08792	-0.0219355	-0.0773805
310	137	0796	0.855325	0.225545	0.638146	0.429706	0.372644
311	137	0972	-1.17203	-1.43055	-0.541663	-1.19326	-1.28715
312	137	1041	-5.70022	-2.52201	-5.60057	-4.46776	-3.90964
313	141	0696	-3.84563	-2.85598	-3.39509	-3.7472	-3.68133
314	141	0717	-0.812285	-0.624005	-0.301075	-0.680809	-0.662349
315	141	0726		-1.2557	-1.82262	-2.38167	-2.1926
316	141	0767	-0.198212	0.975378	-0.170154	-0.512404	-0.414
317	141	0810	-1.23761	-0.955097	-1.16999	-0.943318	-0.942667
318	141	0852	-1.04751	-0.521271	-1.26328	-0.878606	-0.807214
319	141	0853	-1.45756	-1.54459	-0.844364	-1.13234	-0.967602
320	141	1024	-1.87562	-1.31685	-1.27827	-1.52822	-1.4342
321	141	1094	-1.51888	-3.06402	-2.95362	-1.81702	-1.73917
322	141	1137	-1.27306	-2.63673	-2.52305	-3.03464	-2.65032
323	141	1152	-3.27142	-2.21185	-2.94586	-2.99727	-3.01715
325	941	1197	-0.975904	-1.34154	-0.92566	-0.965974	-0.934608
326	941	1202	-0.340753	-0.809329	-0.186403	-0.071285	-0.0507035
327	005	0221	-4.45242	-2.88673	-4.03019	-4.35045	-4.35975
328	020	0883	-0.595916	-0.560552	-0.459563	-0.551324	-0.547601
329	032	0095	0.0272957	-0.155211	-0.159451	0.0136682	-0.0276445
330	032	1101	-1.69463	-0.36397	-0.582617	0.32272	-0.512464
331	036	1001	-1.82248	-1.59525	-0.893861	-1.35013	-1.21631
332	067	0029	-2.47417	-1.77181	-2.2637	-2.51289	-2.39203
333	100	0015	1.32684	3.08373	2.87109	2.43355	2.23766
334	100	0035	-0.15268	0.00025875	-0.0204601	-0.454706	-0.422957
335	100	0047	-1.19098	0.079093	0.0473075	-0.120216	-0.0916724
336	100	0069	-0.666837	-0.320922	-0.409147	-0.416569	-0.435876
337	141	0790	-2.68334	-3.03122	-3.2464	-2.83225	-2.73773
338	009	0751	-1.4785	-1.60444	-1.57083	-1.88902	-1.74672
339	072	0315	-0.463678	-0.332231	-0.224601	-0.295378	-0.341172
340	133	0488	-1.68363	0.526575	-1.40625	-1.85055	-2.2396
341	009	0842	0.135002	0.230011	0.0284228	-0.110138	-0.0926371
342	009	0862	-1.25191	-1.41779	-1.37746	-0.950963	-1.14149
343	012	0712	2.21561	-3.82105	-3.12911	-2.92051	-2.87457
344	012	0720	5.42155	-0.435364	-1.03226	-1.09628	-1.07662
345	018	0043	-0.617174	-0.392722	-0.553817	-0.543766	-0.524826
346	018	0633		-2.89762	-2.8131	-3.00445	-2.90347
347	018	0682	0.30282	-2.43199	-2.305	-2.72614	-2.64866

## Sheet: Table3oasis
SubjID	TP	Vanilla-SIENA	Popescu-SIENA	Cover-SIENA	CBET-SIENA	BEAST-SIENA
OASIS_0112	MR2-1	-2.20374	-5.87387	-4.49774	-9.85939	-3.29019
OASIS_0114	MR2-1	-6.08832	-4.83403	-4.74554	-5.95834	-4.92152
OASIS_0050	MR2-1	-6.61998	-4.77416	-4.84231	-5.17061	-5.27689
OASIS_0048	MR3-1	-6.29936	-6.4768	-5.72433	-5.60196	-4.99587
OASIS_0111	MR2-1	-7.76131	-5.19725	-6.11041	-7.36155	-6.6799
OASIS_0014	MR2-1	-4.18758	-2.50772	-2.98322	-3.95556	-3.43401
OASIS_0182	MR2-1	-5.8327	-3.89817	-4.94183	-6.04636	-5.78367
OASIS_0023	MR2-1	-2.83548	-3.15498	-4.01218	-3.9305	-3.48477
OASIS_0104	MR2-1	-4.03854	-2.37916	-2.41477	-3.14686	-2.68797
OASIS_0165	MR2-1	-9.19791	-6.67639	-4.12757	-4.86686	-3.97011
OASIS_0139	MR2-1	-2.53423	-2.61591	-2.10743	-2.48746	-2.62197
OASIS_0088	MR2-1	-5.24695	-4.1361	-4.53519	-4.59903	-4.2623
OASIS_0184	MR2-1	-3.70827	-3.88151	-3.35128	-3.37121	-3.46462
OASIS_0106	MR2-1	-4.89421	-4.33479	-4.40845	-4.20491	-4.06959
OASIS_0089	MR3-1	-2.94928	-2.30358	-2.28412	-3.08301	-3.84281
OASIS_0040	MR2-1	-3.68802	-4.52976	-4.23438	-2.98008	-2.56047
OASIS_0146	MR2-1	-2.19521	-2.47399	-2.32713	-2.69286	-2.55448
OASIS_0063	MR2-1	-1.91325	1.14883	-2.02787	-2.35324	-2.01044
OASIS_0079	MR2-1	-3.0516	-2.60516	-2.60093	-2.78023	-2.84117
OASIS_0066	MR2-1	-2.32077	-2.00039	-2.01004	-2.22595	-1.94474
OASIS_0026	MR2-1	-3.68158	-2.33263	-2.35018	-2.90731	-2.35237
OASIS_0120	MR2-1	-2.11131	-1.3273	-1.74608	-2.54373	-2.87136
OASIS_0043	MR2-1	-2.2222	-1.7091	-1.92846	-1.89419	-1.82301
OASIS_0164	MR2-1	-2.45229	1.80637	-1.65524	-2.22616	-1.94773
OASIS_0075	MR2-1	-3.14316	-2.03612	-1.42462	-2.10113	-1.27607
OASIS_0185	MR2-1	-2.97766	-1.08867	-2.14977	-3.01475	-2.80294
OASIS_0175	MR2-1	-2.25324	-2.11504	-2.17099	-2.40794	-1.97599
OASIS_0134	MR2-1	0.209685	-2.43656	-1.46925	-1.81195	-1.59336
OASIS_0081	MR2-1	-0.864089	-1.11344	-1.69094	-2.17127	-1.92713
OASIS_0162	MR2-1	-1.80901	-6.97961	-1.66137	-1.95714	-2.00945
OASIS_0002	MR2-1	-1.69139	0.63876	-1.60596	-1.60604	-1.24756
OASIS_0039	MR2-1	-1.53063	-1.49443	-1.40835	-1.38924	-1.33311
OASIS_0028	MR2-1	-2.66957	-2.1766	-2.58432	-1.70845	-1.87738
OASIS_0160	MR2-1	-0.932951	-0.31268	-1.03473	-1.38654	-0.99099
OASIS_0137	MR2-1	-1.58486	-2.87996	-1.26049	-1.50442	-1.27364
OASIS_0099	MR2-1	-1.78864	0.916585	-1.21822	-1.88065	-1.65662
OASIS_0064	MR2-1	-1.93482	-1.53682	-1.93866	-1.8808	-1.80031
OASIS_0087	MR2-1	-1.02829	-1.9625	-1.61436	-1.68697	-1.7429
OASIS_0113	MR2-1	-0.55701	0.204815	-0.532243	-0.856933	-0.662725
OASIS_0179	MR2-1	-1.69539	-1.73739	-1.05102	-0.99739	-1.11264
OASIS_0140	MR2-1	-0.335665	-0.578039	-1.63029	-1.18492	-1.31139
OASIS_0150	MR2-1	0.16498	-1.62979	-1.34653	-0.765078	-1.27323
OASIS_0080	MR2-1	-0.32958	-0.97861	-0.632195	-0.748275	-0.947435
OASIS_0046	MR2-1	0.41208	-1.33151	-1.39497	-0.619905	-0.623434
OASIS_0098	MR2-1	-0.75936	0.585488	-0.596341	-0.643098	-0.600514
OASIS_0044	MR3-1	-0.106255	-6.86013	-1.73971	-0.715996	-0.850562
OASIS_0010	MR2-1	-0.478002	-0.25363	-0.790809	-0.700679	-0.775551
OASIS_0108	MR2-1	-0.297365	-0.126647	-0.73077	-0.718156	-0.931624
OASIS_0157	MR2-1	-2.08107	-4.07998	-1.74728	-0.5148	-1.77324
OASIS_0016	MR2-1	0.06696	-0.0704575	-0.113896	-0.452125	-0.714326
OASIS_0102	MR2-1	-0.669225	2.19558	-0.59709	-0.352525	-0.557469
OASIS_0116	MR2-1	-0.08699	5.17989	0.170485	-0.32351	-0.38194
OASIS_0058	MR3-1	-0.700995	2.93341	-0.938599	-0.367255	-0.791123
OASIS_0009	MR2-1	-0.032565	-0.0817	-0.317192	-0.11394	-0.612824
OASIS_0159	MR2-1	0.11673	-0.27855	-0.550125	0.0744	-0.14023
OASIS_0032	MR2-1	0.05354	-0.997497	1.03504	0.341436	0.221143
OASIS_0007	MR3-1	-0.345995	-3.16466	-0.1632	0.313425	0.27793
OASIS_0181	MR2-1	1.25042	-0.998964	0.490524	0.969467	1.04805
OASIS_0124	MR2-1	0.587514	-0.957106	0.481289	0.854285	0.581503
OASIS_0001	MR2-1	-1.19984	-1.47553	-0.815821	-1.29832	-1.12613
OASIS_0004	MR2-1	-1.30423	-0.424478	-0.00761	-0.468631	-0.373513
OASIS_0005	MR2-1	-1.75306	-0.882711	-2.15878	-1.57888	-1.47104
OASIS_0008	MR2-1	1.06357	-0.0987015	-0.420045	0.239355	-0.399419
OASIS_0012	MR2-1	-2.12409	-1.23787	-1.61009	-1.63396	-1.57904
OASIS_0013	MR2-1	-1.94029	-4.18951	-2.12496	-1.82685	-1.70851
OASIS_0017	MR3-1	-1.16601	-1.86021	-1.05512	-1.08206	-1.0706
OASIS_0022	MR2-1	-1.78846	-1.80583	-1.73787	-1.56499	-1.54785
OASIS_0027	MR2-1	0.171345	0.29077	0.178935	-0.51632	-0.37371
OASIS_0030	MR2-1	-0.306732	-1.31175	-1.13839	-1.20096	-1.40403
OASIS_0034	MR2-1	-1.0791	-1.39044	-1.05452	-1.02833	-0.45217
OASIS_0035	MR2-1	0.119245	1.11825	0.11297	0.344175	0.443299
OASIS_0036	MR3-1	-0.812654	-2.15383	-0.723908	-0.736119	-0.506165
OASIS_0042	MR2-1	-1.90085	-1.39089	-1.71739	-1.80514	-1.82166
OASIS_0045	MR2-1	-0.565199	-0.325584	-0.532686	-0.249561	-0.100359
OASIS_0047	MR2-1	-1.58812	-0.599845	-0.450925	-0.890611	-1.02865
OASIS_0049	MR3-1	2.42199	2.49597	1.71924	2.27095	2.3832
OASIS_0051	MR2-1	-1.67835	-1.30493	-0.587435	-1.78435	-0.870165
OASIS_0053	MR2-1	-0.686004	1.00529	-0.655513	-1.23109	-1.14704
OASIS_0055	MR2-1	-0.140255	-0.776324	-0.192598	-0.547565	-0.43334
OASIS_0056	MR2-1	-0.660371	-0.740185	-0.444359	-0.429495	-0.459724
OASIS_0057	MR2-1	-1.48853	0.285615	-1.27994	-1.55008	-1.57954
OASIS_0061	MR2-1	-2.02949	-2.8478	-1.58682	-1.65412	-1.38719
OASIS_0062	MR2-1	-3.32307	-2.66719	-2.1866	-2.28526	-1.91725
OASIS_0067	MR2-1	-1.11751	-2.08102	-2.259	-1.05471	-1.26597
OASIS_0068	MR2-1	-3.41777	0.202987	-0.209335	-2.25696	-0.789139
OASIS_0069	MR2-1	-0.135911	0.37621	-0.194272	-0.210566	-0.155073
OASIS_0070	MR2-1	-0.409581	1.52666	-0.046428	-0.383551	-0.406222
OASIS_0073	MR2-1	-1.82872	-0.613983	-1.33323	-1.51483	-1.72402
OASIS_0076	MR2-1	0.309209	0.237788	0.172845	0.326286	0.421346
OASIS_0078	MR2-1	0.050275	0.087229	-0.0326	-0.0574935	-0.120731
OASIS_0085	MR2-1	-0.75221	0.146351	-0.299965	-0.565895	-0.492905
OASIS_0086	MR2-1	-1.6306	-1.03513	-1.10754	-1.58865	-1.48725
OASIS_0090	MR2-1	-1.12215	-0.916602	-0.718114	-0.866393	-0.902644
OASIS_0091	MR2-1	-0.75656	-3.7353	-2.5601	-2.53639	-2.58163
OASIS_0094	MR2-1	-1.32281	-0.568461	-1.08906	-1.27528	-1.32782
OASIS_0095	MR2-1	-1.79691	-2.20996	-1.46685	-1.73926	-1.52621
OASIS_0096	MR2-1		0.385472	-1.16381	-1.36114	-1.26183
OASIS_0097	MR2-1	-2.46449	-2.26386	-2.41735	-2.51918	-2.5347
OASIS_0101	MR2-1	-0.538516	-1.1034	-0.637948	-0.569278	-0.596607
OASIS_0105	MR2-1	-1.91359	-1.1045	-1.626	-1.02479	-1.23012
OASIS_0109	MR2-1	-0.635955	-0.362175	-0.434891	-0.8309	-0.67285
OASIS_0117	MR2-1	-0.87255	0.34156	-0.82283	-0.0246	-0.11232
OASIS_0119	MR2-1	-0.215575	-0.764015	0.207185	-0.33882	-0.268346
OASIS_0121	MR2-1	0.07081	-0.166227	-0.407367	-0.259106	-0.492596
OASIS_0122	MR2-1	0.375045	-0.258075	-0.56676	-0.04006	-0.345555
OASIS_0126	MR2-1	-0.404096	0.488311	-0.0188165	-0.444823	-0.398298
OASIS_0129	MR2-1	-0.18228	-0.476295	-0.045919	-0.980459	-0.624453
OASIS_0138	MR2-1	-1.72261	0.113035	-2.47889	-1.97209	-2.22648
OASIS_0141	MR2-1	-0.588512	-0.816085	-0.967399	-0.882395	-0.930864
OASIS_0142	MR2-1	-1.1068	-0.510134	-0.95465	-0.984363	-1.06117
OASIS_0143	MR2-1	-1.17813	-1.12561	-1.13464	-0.942436	-0.888153
OASIS_0147	MR2-1	-1.03765	-0.350326	-0.648065	-0.830717	-0.773961
OASIS_0149	MR2-1	-1.18287	-0.584049	-0.855404	-0.871329	-0.963741
OASIS_0152	MR2-1	0.694354	-0.812538	-0.206244	0.220998	-0.0445635
OASIS_0154	MR2-1
OASIS_0156	MR2-1	-0.775705	3.06667	-0.29299	-0.13703	-0.03173
OASIS_0161	MR2-1	0.41513	0.179545	0.15304	0.717195	0.538117
OASIS_0169	MR2-1	0.18534	0.0785615	0.215589	-0.0200535	-0.152214
OASIS_0171	MR2-1	0.00268	1.27314	0.01068	-0.007135	-0.0291455
OASIS_0174	MR2-1	-1.35816	-0.808107	-1.27184	-1.41815	-1.27897
OASIS_0177	MR2-1	-0.3403	0.13831	-0.350575	-0.36919	-0.480264
OASIS_0178	MR2-1	-0.532322	-2.77152	-0.576541	-0.336805	-0.47048
OASIS_0183	MR3-1	-1.62318	-1.36028	-1.39735	-1.38528	-1.44887
OASIS_0186	MR2-1	-0.674876	-1.08023	-1.09571	-1.032	-0.850021
